# Supplementary material for: Effectiveness and safety of non-steroidal anti-inflammatory drugs and opioid treatment for knee and hip osteoarthritis: network meta-analysis
Source: PubMed Central journal article supplement — BMJ. 2021 Oct 12;375:n2321. doi: 10.1136/bmj.n2321 (PMC8506236; doi:10.1136/bmj.n2321), 2021-10-12
Supplement: dacb066235.ww.pdf [file dacb066235.ww.pdf]

## WEB-APPENDIX

### Comparative effectiveness of non-steroidal anti-inflammatory drugs and opioid therapy for the treatment of pain in knee and hip osteoarthritis: a network meta-analysis

#### Table of Contents

|                                                                                                                                                                                                            |           |
|------------------------------------------------------------------------------------------------------------------------------------------------------------------------------------------------------------|-----------|
| <i>Web-appendix 1. Protocol.....</i>                                                                                                                                                                       | <i>2</i>  |
| <i>Web-appendix 2. Search Strategy.....</i>                                                                                                                                                                | <i>11</i> |
| <i>Web-appendix 3. List of 61 systematic reviews screened for trials that satisfied the eligibility criteria of the current review.....</i>                                                                | <i>12</i> |
| <i>Web-appendix 4. Definitions used to classify trials according to components of methodological quality.....</i>                                                                                          | <i>22</i> |
| <i>Web-appendix 5. Description of the main model of analysis (Random walk)...</i>                                                                                                                          | <i>24</i> |
| <i>Web-appendix 6. Imputation of missing standard deviations .....</i>                                                                                                                                     | <i>28</i> |
| <i>Web-appendix 7. Treatment effect estimates for pain, physical function, and adverse events, as compared to oral placebo .....</i>                                                                       | <i>31</i> |
| <i>Web-appendix 8. Number of arms and randomized participants.....</i>                                                                                                                                     | <i>34</i> |
| <i>Web-appendix 9. Network plot.....</i>                                                                                                                                                                   | <i>37</i> |
| <i>Web-appendix 10. Number of trials reporting efficacy estimates by drug category and timepoint.....</i>                                                                                                  | <i>39</i> |
| <i>Web-appendix 11. Trial characteristics.....</i>                                                                                                                                                         | <i>40</i> |
| <i>Web-appendix 12. Summary risk of bias .....</i>                                                                                                                                                         | <i>53</i> |
| <i>Web-appendix 13. Dose-response analysis .....</i>                                                                                                                                                       | <i>54</i> |
| <i>Web-appendix 14. Differences in pain intensity expressed as effect sizes comparing each intervention to oral placebo over time.....</i>                                                                 | <i>57</i> |
| <i>Web-appendix 15. Treatment effect estimates for pain (effect sizes [95% CrI]) adjusted by risk of bias .....</i>                                                                                        | <i>60</i> |
| <i>Web-appendix 16. Results for the primary outcome (pain) based on different prior distributions for the between-trial heterogeneity.....</i>                                                             | <i>65</i> |
| <i>Web-appendix 17. Dropouts due to adverse events and treatment effect on osteoarthritis pain as compared to oral placebo, ordered according to the odds ratio of dropouts due to adverse events.....</i> | <i>67</i> |
| <i>Web-appendix 18. Model fit for pain and function.....</i>                                                                                                                                               | <i>69</i> |
| <i>Web-appendix 19. Model fit for safety outcomes .....</i>                                                                                                                                                | <i>70</i> |
| <i>Web-appendix 20. Assessment of inconsistency.....</i>                                                                                                                                                   | <i>71</i> |

## Web-appendix 1. Protocol

### **Protocol for a systematic review and network meta-analysis: Comparative effectiveness of non-steroidal anti-inflammatory drugs and opioid therapy for the treatment of pain in knee and hip osteoarthritis: a network meta-analysis**

**Authors:** Bruno R. da Costa, Tiago V. Pereira, Peter Jüni

**Note:** This protocol is based on our previous network meta-analysis and its protocol (da Costa et al., 2017).

**Date:** August 5<sup>th</sup>, 2021 (replaces the initial versions of October 9<sup>th</sup> and November 15<sup>th</sup> 2020)

#### **Introduction**

Osteoarthritis (OA) is a clinical syndrome that most commonly affects the knee, hip, and hand joints in the elderly population [1]. It is accompanied by increased pain symptoms, which result in reduced physical function and quality of life, thereby increasing the risk of all-cause mortality [2-3]. Based on the hierarchical treatment modalities for managing osteoarthritis, non-steroidal anti-inflammatory drugs (NSAIDs) followed by opioids are the first line of pharmacotherapy, after nonpharmacologic therapy, such as exercise and weight loss [4]. While considerable uncertainty remains regarding the benefits and risks of opioid therapy to treat pain and function in the knee or hip OA patients [5], prescribed opioid use for musculoskeletal pain has increased by 70% between 2001 and 2010 in the US [6]. Therefore, we will conduct a network meta-analysis to assess the efficacy and safety of different drugs and doses of NSAIDs and opioids, establish a more comprehensive panorama about the benefits and risks of those therapies to treat pain and function in patients with knee or hip OA.

#### **Objectives**

- To describe the effectiveness and safety of NSAIDs, opioids, and acetaminophen (paracetamol) for pain and function management of patients with knee or hip OA using large randomized trials.
- To provide a risk-benefit perspective of the different preparations and doses of NSAIDs, opioids, and acetaminophen (paracetamol) considering their effects on pain and function and their safety profiles as measured by the rate of adverse events and dropouts.

## **Criteria for considering trials for this review**

### *Types of trials*

We will include only randomized trials with, on average, at least 100 patients per arm. Any non-randomized study will not be eligible.

### *Types of participants (population)*

Patients with knee or hip osteoarthritis will be the study population. More specifically, we will consider large randomized co), or placebo. Trials that included patients with other types of arthritis or joints other than knee or hip will be only included if at least 75% of the included patients were confirmed to have knee or hip osteoarthritis and data pertaining to that cohort are retrievable. In addition, trials must have at least one follow-up measurement of pain or another algo-functional outcome. To reduce small-study bias, trials must have randomly assigned, on average, at least 100 patients per group. We will include trials and/or reports published in English only. However, no restriction will be applied to publication status or year of publication as long as data are retrievable.

### *Type of interventions*

We will include trials examining the effects of any non-steroidal anti-inflammatory drugs (NSAIDs), any opioids, and any preparation of acetaminophen (paracetamol) on knee/hip OA.

### *Control*

We will use as comparator acetaminophen (paracetamol) or placebo.

### *Type of outcomes*

#### Primary outcome

Our prespecified primary outcome will be pain. If a trial presented pain outcome on more than one scale, the following hierarchical list will be used to extract data from the scale higher on the list (1) global pain score; (2) pain on walking; (3) WOMAC osteoarthritis index pain subscore; (4) composite pain scores other than WOMAC; (5) pain on activities other than walking (such as stair climbing); (6) WOMAC global score; (7) Lequesne osteoarthritis index global score; (8) other algo-functional composite scores; (9) patient's global assessment; (10) physician's global assessment. Data will be extracted for the following time points whenever available: 1 week ( $\pm 2$  days), 2 weeks ( $\pm 2$  days), 4 weeks ( $\pm 3$  to 4.5 weeks), 6 weeks ( $\pm 1$  week), 12 weeks ( $\pm 4$  weeks), 24 weeks ( $\pm 4$  weeks), 48 weeks ( $\pm 4$  weeks), or at the end of treatment if not covered by the prespecified time points.

Secondary outcomes: Efficacy

Our secondary prespecified outcome will be physical function. If a trial presented function outcome on more than one scale, the following hierarchical list will be used to extract data from the scale higher on the list (1) global function score; (2) walking disability; (3) WOMAC osteoarthritis index physical function subscore; (4) composite physical function scores other than WOMAC; (5) physical function on activities other than walking (such as stair climbing); (6) WOMAC global score; (7) Lequesne osteoarthritis index global score; (8) other algo-functional composite scores; (9) patient’s global assessment; (10) physician’s global assessment. We will extract data on this outcome for the same time points as those mentioned for pain.

Secondary outcomes: Safety

We will also evaluate safety outcomes: lack of efficacy, any dropouts, any adverse events, serious adverse events, dropouts due to adverse events, and all-cause mortality. Adverse events will be captured as a binary outcome.

**Search Strategy**

We will use a simple search strategy with high sensitivity. The search will be conducted via the Cochrane Central Register of Controlled Trials (CENTRAL) (inception to date of final search update):

| Step                                                                                                                             |
|----------------------------------------------------------------------------------------------------------------------------------|
| 1 (osteoarthritis* OR osteoarthro* OR gonarthriti* OR gonarthro* OR coxarthriti* OR coxarthro* OR arthros* OR arthrot*):ti,ab,kw |
| 2 MeSH descriptor <b>Osteoarthritis</b> explode all trees                                                                        |
| 3 (#1 OR #2) in Trials                                                                                                           |

*Searching other resources*

We will screen reference lists of all obtained articles, including relevant reviews. Finally, we will search for clinical trial registries through clinicaltrials.gov

**Data collection and analysis**

*Selection of trials*

## Comparative effectiveness of non-steroidal anti-inflammatory drugs and opioid therapy

Two review authors will independently evaluate all identified potentially eligible titles and abstracts for eligibility. Disagreements will be resolved by consensus or discussion with a third investigator. If multiple reports describe the same trial, we will consider the most comprehensive information. In case of discrepancies, information submitted to regulatory authorities will precede peer-reviewed information and non-peer-reviewed information. More up-to-date information will take precedence over older information.

We will screen trials for eligibility, data availability, and all steps based on a consensus reached via a standardized and piloted web-based data management platform.

### *Data extraction and management*

We will extract trial characteristics, such as study design, sample size, and follow-up duration; intervention characteristics, such as dose and treatment duration; participant characteristics, such as mean age, sex, mean duration of symptoms, index joint; type of outcome (pain or function); and outcome data for each time point of interest. We will extract data before the crossover timepoint to eliminate any possible carryover effects in crossover trials. Whenever necessary, we will approximate the means and measures of dispersions from graphs in the reports. Results based on the ITT analysis will be preferred whenever possible.

### *Assessment of risk of bias in included studies*

Two review authors will independently assess randomization, blinding, and adequacy of analyses. Disagreements will be resolved by consensus. We will assess two components of randomization: generation of allocation sequences and concealment of allocation. We will consider the generation adequate if it resulted in unpredictable allocation sequences; mechanisms considered adequate include random-number tables, computer-generated random numbers, minimization, coin tossing, shuffling of cards, and drawing of lots. We will consider allocation concealment adequate if the investigators responsible for patient selection were unable to deduce before allocation which treatment was next; methods considered adequate included central randomization and sequentially numbered, sealed, opaque envelopes. We will consider the blinding of the patients adequate if the interventions were explicitly described as indistinguishable. We will consider analyses adequate if all randomized patients were included in the analysis according to the intention-to-treat principle.

### *Strategy for data synthesis*

#### Measures of treatment effect

The effect measure will be the standardized mean difference (SMD) for continuous outcomes and the odds ratio (RR) for binary outcomes.

### *Data synthesis*

We will use an extension of multivariable Bayesian random-effects models for mixed multiple treatment comparisons [7]. These models fully preserve the direct randomized comparisons within each trial and compare all available interventions across trials, and account for multiple comparisons in trials with more than two treatment groups. The model includes a random effect at the level of trials and uses a random walk to account for the correlation of longitudinal outcome data in trials reporting results for more than one time point, borrowing strength across timepoints for an estimate. The model assumes that, within a trial with longitudinal outcome data, the data recorded at a specified time point are more similar to the outcome data recorded at adjacent time points immediately before and after than at nonadjacent, more remote time points. We will use the following prior distributions for the heterogeneity parameters: a gamma distribution for between-trial heterogeneity ( $1/\tau^2 \sim \text{gamma}(0.1, 0.1) | (0, 2000)$ ) and a uniform distribution for between-timepoint heterogeneity ( $\tau \sim \text{unif}(0, 5)$ ). A half-normal distribution  $\tau \sim \text{normal}(0, 1) | (0, \infty)$  will be used in a sensitivity analysis for the between-trial heterogeneity. We will assess the goodness of fit of the model to the data by calculating the number of means of standardized node-based residuals within 1.96 of the standard normal distribution; visually inspecting the distribution of residuals on Q–Q plots; calculating the heterogeneity of treatment effects estimated from the posterior median between trial variance  $\tau^2$ , and calculating the consistency of the network (determined by the difference in effect sizes derived from direct and indirect comparisons). The posterior probability for the effect of the experimental intervention will be the minimum clinically important difference of  $-0.37$  SD units, with high posterior probabilities favoring the active treatment. This threshold of  $0.37$  SD units is based on the median minimum clinically important between-group difference reported in studies in osteoarthritis patients. An effect size of  $0.37$  corresponds to a difference of  $9$  mm on a  $100$  mm visual analog scale. Analyses will be done with Stata (StataCorp, College Station, TX, USA) and OpenBUGS (MRC Biostatistics Unit Cambridge, UK).

### *Analysis of subgroups or subsets*

We will adjust the results of the primary outcome for trial characteristics (e.g., concealment of allocation, therapist blinding, completeness of outcome data) by incorporating a regression coefficient in the model. We will estimate two-sided  $p$  values for interaction between treatment effects and trial characteristics from the posterior distribution. We will conduct separate analyses per timepoint to assess whether treatment effects varied over time.

### *Role of the funding source*

## Comparative effectiveness of non-steroidal anti-inflammatory drugs and opioid therapy

The Arthritis Society (Canada, grant YIO-17-0164) will have no role in study design, data collection, data synthesis, data interpretation, writing the report, or the decision to submit the manuscript for publication. None of the authors is affiliated with or funded by any manufacturer of any of the agents evaluated in this study.

## References

- [1] Altman R, Brandt K, Hochberg M, et al. Design and conduct of clinical trials in patients with osteoarthritis: recommendations from a task force of the Osteoarthritis Research Society. Results from a workshop. *Osteoarthritis Cartilage* 1996; 4: 217–43.
- [2] Nüesch E, Dieppe P, Reichenbach S, Williams S, Iff S, Jüni P. All cause and disease specific mortality in patients with knee or hip osteoarthritis: population based cohort study. *BMJ* 2011; 342: d1165.
- [3] Hawker GA, Croxford R, Bierman AS, et al. All-cause mortality and serious cardiovascular events in people with hip and knee osteoarthritis: a population based cohort study. *PLoS One* 2014; 9: e91286.
- [4] National Clinical Guideline Centre (UK). *Osteoarthritis: Care and Management in Adults*.
- [5] Avouac J, Gossec L, Dougados M. Efficacy and safety of opioids for osteoarthritis: a meta-analysis of randomized controlled trials. *Osteoarthritis Cartilage* 2007; 15: 957–65.
- [6] Larochelle MR, Zhang F, Ross-Degnan D, Wharam, JF. Trends in opioid prescribing and co-prescribing of sedative hypnotics for acute and chronic musculoskeletal pain: 2001–2010. *Pharmacoepidemiology and drug safety* 2015; 24(8): 885-892.
- [7] da Costa BR, Reichenbach S, Keller N, *et al.* Effectiveness of non-steroidal anti-inflammatory drugs for the treatment of pain in knee and hip osteoarthritis: a network meta-analysis. *Lancet* 2017; 390: e21–33.



## Change history

As of August 5<sup>th</sup>, 2021, we have added minor modifications to the initial versions of the protocol. Specifically, we have changed the following items before or during the review process:

### *Modification/decision made before the review process started:*

1. We will change the time point “4 weeks” from 4 weeks ( $\pm 1$  week) to 4 weeks (from 3 weeks to 4.5 weeks) to avoid overlap with the next time point “6 weeks ( $\pm 1$  week)”.
2. We will evaluate the risk of bias regarding incomplete outcome data focusing on the use of imputation methods (deterministic or probabilistic) in the trials to take into account dropouts or missing data. This domain in the risk of bias will be assessed for pain and function separately.

### *Modification/decision made after the review process started:*

3. We will not present results for all comparisons because of the excessively high number of preparations found (>3400 head-to-head comparisons). Results will be presented comparing each intervention to a common control group, which will be the oral placebo.
4. The following outcomes will not be analyzed: all-cause mortality (because of sparse data; not enough evidence for a network meta-analysis), any dropouts, and lack of efficacy. For the latter two outcomes, the decision of not analyzing the results was based on the large amount of information already collected for safety outcomes (any adverse events (AEs), serious AEs, and dropouts due to AEs).
5. We added a sensitivity analysis focused on time point 1 week and time point 12 weeks. These analyses were anticipated in the initial protocol, but the time points had not been defined.
6. We changed the metric for the binary outcomes. Specifically, we will analyze data using rate ratio. This modification was necessary since the follow-up time varied significantly across trials. Therefore, the follow-up period was taken into account in the final analyses.
7. We revoked protocol change #6 mentioned above and went back to the original plan of analyzing binary outcomes using the odds ratio. Difficulties in estimating rate ratios due to convergence problems with Poisson likelihood and log link led to a second change of the metric used to capture binary outcomes. Specifically, after technical discussion among the statisticians and methodologists of the project on February 8, 2021, we amended the systematic review protocol. We decided to use odds ratios instead of rate ratios to summarize binary outcomes.

## Comparative effectiveness of non-steroidal anti-inflammatory drugs and opioid therapy

8. After submission, reviewers and editors requested an additional search, including Medline and Embase. Therefore, non-prespecified searches were performed in Medline+Embase (via OVID), encompassing database inception to June 28th, 2021.

## Web-appendix 2. Search Strategy

The Cochrane Central Register of Controlled Trials was searched through the Cochrane library from inception to 30<sup>th</sup> of June 2021.

| <b>Cochrane Central Register of Controlled Trials (CENTRAL)</b> |                                                                                                                               |
|-----------------------------------------------------------------|-------------------------------------------------------------------------------------------------------------------------------|
| <b>Step</b>                                                     | <b>Search Strategy</b>                                                                                                        |
| 1                                                               | (osteoarthriti* OR osteoarthro* OR gonarthriti* OR gonarthro* OR coxarthriti* OR coxarthro* OR arthros* OR arthrot*):ti,ab,kw |
| 2                                                               | MeSH descriptor <b>Osteoarthritis</b> explode all trees                                                                       |
| 3                                                               | (#1 OR #2) in Trials                                                                                                          |

The search on Medline and Embase databases was searched through OVID inception to 28<sup>th</sup> June 2021.

| <b>MEDLINE + EMBASE (via OVID)</b> |                                                                                                                                                                                                                                                       |
|------------------------------------|-------------------------------------------------------------------------------------------------------------------------------------------------------------------------------------------------------------------------------------------------------|
| <b>Step</b>                        | <b>Search Strategy</b>                                                                                                                                                                                                                                |
| 1                                  | (osteoarthriti* or osteoarthro* or gonarthriti* or gonarthro* or coxarthriti* or coxarthro* or arthros* or arthrot*).mp. [mp=ti, ab, ot, nm, hw, fx, kf, ox, px, rx, ui, sy, tn, dm, mf, dv, kw, dq]                                                  |
| 2                                  | osteoarthritis.mp. [mp=ti, ab, ot, nm, hw, fx, kf, ox, px, rx, ui, sy, tn, dm, mf, dv, kw, dq]                                                                                                                                                        |
| 3                                  | (#1 OR #2) in Trials<br>Limit 3 to randomized controlled trial<br>Limit 4 to English language<br>Limit 5 to (buccal or intraarticular or intradermal or intramuscular or intravenous or oral or subcutaneous or sublingual or topical or transdermal) |

Limit #5 is not valid in Medline (e.g., only applicable to EMBASE).

Comparative effectiveness of non-steroidal anti-inflammatory drugs and opioid therapy

**Web-appendix 3. List of 61 systematic reviews screened for trials that satisfied the eligibility criteria of the current review**

| Author                   | Year | Network meta-analysis? | Joint*          | Specific to OA? | Treatments#          | Trials | Period                                                         | Databases                                                                                       |
|--------------------------|------|------------------------|-----------------|-----------------|----------------------|--------|----------------------------------------------------------------|-------------------------------------------------------------------------------------------------|
| Avouac <sup>1</sup>      | 2007 | No                     | Mixed           | Yes             | Opioids              | 22     | Between 1966 and August 2006                                   | Medline, Embase and CENTRAL                                                                     |
| Bannuru <sup>2</sup>     | 2014 | No                     | Knee            | Yes             | NSAIDs vs IA         | 5      | Inception until February 2013                                  | Medline, Embase, Google Scholar, ISI Web of Science, and CENTRAL                                |
| Bannuru <sup>3</sup>     | 2015 | Yes                    | Knee            | Yes             | Mixed                | 137    | Inception through August 2014                                  | MEDLINE, EMBASE, Web of Science, Google Scholar, Cochrane Central Register of Controlled Trials |
| Bannuru <sup>4</sup>     | 2015 | Yes                    | Knee            | Yes             | Mixed                | 149    | Inception through 1 June 2015                                  | Medline, Embase, Web of Science, Google Scholar, and CENTRAL and unpublished                    |
| Beaudart <sup>5</sup>    | 2020 | Yes                    | Knee            | Yes             | Mixed                | 80     | Inception to August 2019                                       | Medline, Scopus, and Cochrane database of systematic reviews                                    |
| Berenbaum <sup>6</sup>   | 2005 | No                     | Knee and hip    | Yes             | NSAIDs               | 9      | Not described                                                  |                                                                                                 |
| Biswal <sup>7</sup>      | 2006 | No                     | Knee            | Yes             | NSAIDs               | 4      | 1966 to December 2004                                          | PubMed, Medline, Embase, and CENTRAL                                                            |
| Bjordal <sup>8</sup>     | 2007 | Yes                    | Knee            | Yes             | Mixed                | 63     | From 1966 through November 2005                                | Medline, Embase, PedRo and CENTRAL                                                              |
| Cepeda <sup>9</sup>      | 2007 | No                     | Hip and/or knee | Yes             | Opioids              | 11     | Up to August 2005                                              | CENTRAL, Medline, Embase, and Lilacs                                                            |
| Chen <sup>10</sup>       | 2007 | No                     | Mixed           | Yes             | NSAIDs               | 55     | 1966 to June 2006                                              | Medline, Embase and CENTRAL                                                                     |
| da Costa <sup>11</sup>   | 2014 | No                     | Knee or hip     | Yes             | Opioids              | 22     | Up to 28 July 2008, with an update performed on 15 August 2012 | CENTRAL, Medline, Embase and CINAHL                                                             |
| da Costa <sup>12</sup>   | 2017 | Yes                    | Knee and hip    | Yes             | NSAIDs + Paracetamol | 76     | 1980 to February 2015                                          | Medline, Embase and CENTRAL                                                                     |
| Datto <sup>13</sup>      | 2013 | Yes                    | Mixed           | No              | NSAIDs               | 167    | Inception to April 2009                                        | Medline, Embase and CENTRAL                                                                     |
| De Vecchis <sup>14</sup> | 2014 | No                     | Mixed           | No              | NSAIDs               | 58     | Inception to March 2014                                        | PubMed, Embase and clinicalstudyresults.org                                                     |
| DeRogatis <sup>15</sup>  | 2019 | No                     | Knee            | Yes             | Mixed                | 43     | January 1995 to December 2018                                  | PubMed and EBSCO Host.                                                                          |
| Derry <sup>16</sup>      | 2016 | No                     | Mixed           | No              | NSAIDs               | 39     | Inception to February 2016                                     | Medline, Embase and CENTRAL                                                                     |
| Essex <sup>17</sup>      | 2013 | No                     | Mixed           | No              | NSAIDs               | 51     | Inception to July 2011                                         | Pfizer clinical trial repository                                                                |

Comparative effectiveness of non-steroidal anti-inflammatory drugs and opioid therapy

|                               |      |     |              |     |                                |    |                                                                       |                                                                                                                                                                                         |
|-------------------------------|------|-----|--------------|-----|--------------------------------|----|-----------------------------------------------------------------------|-----------------------------------------------------------------------------------------------------------------------------------------------------------------------------------------|
| Freyenhagen <sup>18</sup>     | 2021 | No  | Mixed        | No  | Opioids                        | 48 | Up to December 2017, with an update performed in April 2019           | Medline, Embase, PubMed, Cochrane databases and trial registries                                                                                                                        |
| Fuggle <sup>19</sup>          | 2019 | No  | Mixed        | Yes | Opioids                        | 17 | Inception to 30 June 2017                                             | Medline, Ovid CENTRAL, and Scopus                                                                                                                                                       |
| Garner <sup>20</sup>          | 2005 | No  | Mixed        | No  | NSAIDs                         | 26 | Inception to August 2004                                              | Medline, Embase, Cochrane Database of Systematic Reviews, CENTRAL, National Research Register, NHS Economic Evaluation Database, Health Technology Assessment Database.                 |
| Gregori <sup>21</sup>         | 2018 | No  | Knee         | Yes | Mixed                          | 47 | Until June 30 2018                                                    | Medline, Scopus, Embase, Web of Science, and CENTRAL                                                                                                                                    |
| Henriksen <sup>22</sup>       | 2016 | No  | Knee         | Yes | Mixed                          | 54 | Carried out on 31 January 2014                                        | The Cochrane Database of systematic reviews                                                                                                                                             |
| Honvo <sup>23</sup>           | 2019 | No  | Mixed        | No  | NSAIDs                         | 25 | Inception to August 2017                                              | Medline, CENTRAL, and Scopus electronic databases                                                                                                                                       |
| Huang <sup>24</sup>           | 2021 | No  | Knee         | Yes | NSAIDs                         | 12 | Inception to September 2019                                           | PubMed, CENTRAL, Embase, the China Biology Medicine disc (CBM), the Chinese Scientific Journal Database (VIP), China National Knowledge Infrastructure (CNKI), and the Wanfang Database |
| Jevsevar <sup>25</sup>        | 2018 | Yes | Knee         | Yes | Mixed                          | 53 | Up to October 7, 2015                                                 | PubMed, Embase, and CENTRAL                                                                                                                                                             |
| Jung <sup>26</sup>            | 2018 | Yes | Knee         | Yes | NSAIDs + Opioids + Paracetamol | 44 | Inception to June 2016                                                | Medline, Embase and CENTRAL                                                                                                                                                             |
| Kim <sup>27</sup>             | 2017 | Yes | Mixed        | No  | NSAIDs                         | 10 | Inception to September 2017                                           | Medline, Embase and CENTRAL                                                                                                                                                             |
| Kongtharvonskul <sup>28</sup> | 2015 | Yes | Knee         | Yes | Mixed                          | 31 | Inception to 29 August 2014                                           | Medline and Scopus                                                                                                                                                                      |
| Lee <sup>29</sup>             | 2004 | No  | Mixed        | Yes | NSAIDs + Paracetamol           | 7  | 1966 to February 2003 (Medline)/(1991 to first quarter 2003 (Embase)) | Medline and Embase                                                                                                                                                                      |
| Leopoldino <sup>30</sup>      | 2019 | No  | Knee and hip | Yes | Paracetamol                    | 10 | Inception to October 2017                                             | CENTRAL, Medline, Embase, AMED, CINAHL, Web of Science, LILACS, and International Pharmaceutical                                                                                        |
| Lin <sup>31</sup>             | 2004 | No  | Mixed        | Yes | NSAIDs                         | 13 | 1966 to October 2003                                                  | Medline, Embase, Scientific Citation Index, CINAHL, Cochrane Library, and abstracts from conferences                                                                                    |
| Makris <sup>32</sup>          | 2010 | No  | Mixed        | Yes | NSAIDs                         | 16 | 1950 to November 2009                                                 | Scopus, Embase, Web of Science, Cochrane                                                                                                                                                |

Comparative effectiveness of non-steroidal anti-inflammatory drugs and opioid therapy

|                            |      |    |             |     |             |    |                                      |                                                                                                                                                                             |
|----------------------------|------|----|-------------|-----|-------------|----|--------------------------------------|-----------------------------------------------------------------------------------------------------------------------------------------------------------------------------|
|                            |      |    |             |     |             |    |                                      | databases, Dissertation and American College of Rheumatology meeting Abstracts.                                                                                             |
| Matchaba <sup>33</sup>     | 2005 | No | Mixed       | No  | NSAIDs      | 22 | Not described                        | Novartis Lumiracoxib Clinical Trial Database                                                                                                                                |
| Miller <sup>34</sup>       | 2020 | No | Knee        | Yes | Mixed       | 6  | Up to March 31, 2019                 | Medline, Embase, and CENTRAL                                                                                                                                                |
| Myers <sup>35</sup>        | 2014 | No | Mixed       | Yes | Mixed       | 32 | Between January 1985 and March 2013  | PubMed, Embase, Medline, In-Process, Cochrane Library, and ClinicalTrials.gov                                                                                               |
| Osani <sup>36</sup>        | 2020 | No | Knee        | Yes | NSAIDs      | 72 | Inception to May 2018                | Medline, Embase, Web of Science, Google Scholar, and the Cochrane Database                                                                                                  |
| Osani <sup>37</sup>        | 2020 | No | Knee or hip | Yes | Opioids     | 18 | Inception to December 2019           | Medline, Embase, PubMed Central, and CENTRAL                                                                                                                                |
| Patel <sup>38</sup>        | 2017 | No | Mixed       | Yes | NSAIDs      | 9  | Inception to April 2016              | PubMed, Google Scholar, Cochrane systematic review database, clinicaltrial registry (clinicaltrials.Gov) and bibliographies of relevant articles.                           |
| Pavelka <sup>39</sup>      | 2012 | No | Mixed       | Yes | NSAIDs      | 37 | 1999 to September 2010               | Medline and Embase                                                                                                                                                          |
| Phleps <sup>40</sup>       | 2001 | No | Mixed       | No  | NSAIDs      | 7  | Not described                        | Not described                                                                                                                                                               |
| Puljak <sup>41</sup>       | 2017 | No | Mixed       | Yes | NSAIDs      | 36 | Inception to April 2017              | CENTRAL, Medline, Embase and clinical trials registers                                                                                                                      |
| Richy <sup>42</sup>        | 2009 | No | Mixed       | No  | NSAIDs      | 75 | January 1980 to August 2006          | Medline and Premedline, Biosis Preview, Healthstar, Embase, CENTRAL, Current Contents, EBM reviews                                                                          |
| Schoenfeld <sup>43</sup>   | 1999 | No | Mixed       | No  | NSAIDs      | 12 | 1990 to 1998                         | Medline                                                                                                                                                                     |
| Smith <sup>44</sup>        | 2016 | No | Knee        | Yes | Mixed       | 17 | Between 1982 and 2015                | PubMed, Web of Science – Science Citation Index Expanded, Embase, and CENTRAL                                                                                               |
| Smith <sup>45</sup>        | 2016 | No | Mixed       | Yes | NSAIDs      | 57 | Inception to February 2015           | Medline, Embase, AMED, CINAHL and the Cochrane library                                                                                                                      |
| Stewart <sup>46</sup>      | 2018 | No | Mixed       | Yes | Mixed       | 29 | From 2006 through to the end of 2016 | Medline                                                                                                                                                                     |
| Taylor <sup>47</sup>       | 2011 | No | Mixed       | No  | NSAIDs      | 37 | Inception to March 2010              | Medline                                                                                                                                                                     |
| Toupin April <sup>48</sup> | 2019 | No | Mixed       | Yes | Opioids     | 22 | Up to February 2018                  | CENTRAL, Medline, Embase, US National Institutes of Health and World Health Organization trial registries                                                                   |
| Towheed <sup>49</sup>      | 1997 | No | Knee        | Yes | Mixed       | 80 | 1966 to August 1994                  | Medline                                                                                                                                                                     |
| Towheed <sup>50</sup>      | 2006 | No | Knee        | Yes | NSAIDs      | 4  | 1966 to February 2005                | Medline, Embase, CENTRAL, Cochrane Database of Systematic Reviews (CDSR), American College of Physicians (ACP) Journal Club, Database of Abstracts of Effectiveness (DARE). |
| Towheed <sup>51</sup>      | 2006 | No | Mixed       | Yes | Paracetamol | 15 | Up to July 2005                      | Medline, Embase and CENTRAL Cochrane                                                                                                                                        |

Comparative effectiveness of non-steroidal anti-inflammatory drugs and opioid therapy

|                          |      |     |                 |     |                      |     |                                                         | Database of Systematic Reviews (CDSR),<br>American College of Physicians (ACP) Journal<br>Club, Database of Abstracts of Effectiveness<br>(DARE) |
|--------------------------|------|-----|-----------------|-----|----------------------|-----|---------------------------------------------------------|--------------------------------------------------------------------------------------------------------------------------------------------------|
| Van Walsem <sup>52</sup> | 2015 | Yes | Mixed           | No  | NSAIDs               | 176 | Inception to June 2013                                  | Medline, Embase, and Cochrane Library                                                                                                            |
| Welsch <sup>53</sup>     | 2020 | No  | Mixed           | Yes | Opioids              | 22  | October 2013 to July 2019                               | Clinicaltrials.gov, CENTRAL, Medline and PsycINFO                                                                                                |
| Wiffen <sup>54</sup>     | 2020 | No  | Mixed           | No  | NSAIDs               | 23  | Inception to November 2018                              | Medline, Embase and CENTRAL                                                                                                                      |
| Wolff <sup>55</sup>      | 2021 | No  | Knee            | Yes | NSAIDs               | 18  | June 2018 (Medline and Embase)/September 2020 (CENTRAL) | Medline, Embase and CENTRAL                                                                                                                      |
| Zeng <sup>56</sup>       | 2021 | Yes | Knee            | Yes | NSAIDs + Paracetamol | 122 | Inception to March 2021                                 | PubMed, Embase, Cochrane Library, and Web of Science                                                                                             |
| Zeng <sup>57</sup>       | 2018 | Yes | Mixed           | Yes | NSAIDs               | 36  | 1966 to January 2017                                    | PubMed, Embase, Cochrane Library and Web of Science                                                                                              |
| Zhang <sup>58</sup>      | 2008 | No  | Mixed           | Yes | Mixed                | 198 | Unclear (inception to January-February 2007)            | Medline, Embase, Scientific Citation Index, CINAHL and Cochrane Library.                                                                         |
| Zhang <sup>59</sup>      | 2004 | No  | Mixed           | Yes | Paracetamol          | 10  | 1966 to July 2003                                       | Medline, Embase, Scientific Citation Index, CINAHL, Cochrane Library, and conference Abstracts                                                   |
| Zhang <sup>60</sup>      | 2021 | Yes | Hip and/or knee | Yes | Opioids              | 6   | Up to May 2020                                          | Pubmed, Embase, Cochrane Library and Web of Science                                                                                              |
| Zhu <sup>61</sup>        | 2018 | Yes | Knee or hip     | Yes | Mixed                | 61  | Inception to October 23, 2017                           | PubMed, Embase, and Cochrane Library                                                                                                             |

\* Mixed = different joints (elbow, ankle, among others) including knee and hip.

#Mixed = includes several modalities: exercise, IA, nutraceuticals, among others.

## References

1. Avouac J, Gossec L, Dougados M. Efficacy and safety of opioids for osteoarthritis: a meta-analysis of randomized controlled trials. *Osteoarthritis Cartilage* 2007;15(8):957-65. doi: 10.1016/j.joca.2007.02.006 [published Online First: 2007/04/03]
2. Bannuru RR, Vaysbrot EE, Sullivan MC, et al. Relative efficacy of hyaluronic acid in comparison with NSAIDs for knee osteoarthritis: a systematic review and meta-analysis. *Semin Arthritis Rheum* 2014;43(5):593-9. doi: 10.1016/j.semarthrit.2013.10.002 [published Online First: 2013/11/13]
3. Bannuru RR, Schmid CH, Kent DM, et al. Comparative effectiveness of pharmacologic interventions for knee osteoarthritis: a systematic review and network meta-analysis. *Ann Intern Med* 2015;162(1):46-54. doi: 10.7326/m14-1231 [published Online First: 2015/01/07]
4. Bannuru RR, McAlindon TE, Sullivan MC, et al. Effectiveness and Implications of Alternative Placebo Treatments: A Systematic Review and Network Meta-analysis of Osteoarthritis Trials. *Ann Intern Med* 2015;163(5):365-72. doi: 10.7326/m15-0623 [published Online First: 2015/07/29]
5. Beaudart C, Lengelé L, Leclercq V, et al. Symptomatic Efficacy of Pharmacological Treatments for Knee Osteoarthritis: A Systematic Review and a Network Meta-Analysis with a 6-Month Time Horizon. *Drugs* 2020;80(18):1947-59. doi: 10.1007/s40265-020-01423-8 [published Online First: 2020/10/20]
6. Berenbaum F, Grifka J, Brown JP, et al. Efficacy of lumiracoxib in osteoarthritis: a review of nine studies. *J Int Med Res* 2005;33(1):21-41. doi: 10.1177/147323000503300102 [published Online First: 2005/01/18]
7. Biswal S, Medhi B, Pandhi P. Longterm efficacy of topical nonsteroidal antiinflammatory drugs in knee osteoarthritis: metaanalysis of randomized placebo controlled clinical trials. *J Rheumatol* 2006;33(9):1841-4. [published Online First: 2006/09/09]
8. Bjordal JM, Klovning A, Ljunggren AE, et al. Short-term efficacy of pharmacotherapeutic interventions in osteoarthritic knee pain: A meta-analysis of randomised placebo-controlled trials. *Eur J Pain* 2007;11(2):125-38. doi: 10.1016/j.ejpain.2006.02.013 [published Online First: 2006/05/10]
9. Cepeda MS, Camargo F, Zea C, et al. Tramadol for osteoarthritis: a systematic review and metaanalysis. *J Rheumatol* 2007;34(3):543-55. [published Online First: 2007/03/09]
10. Chen LC, Ashcroft DM. Risk of myocardial infarction associated with selective COX-2 inhibitors: meta-analysis of randomised controlled trials. *Pharmacoepidemiol Drug Saf* 2007;16(7):762-72. doi: 10.1002/pds.1409 [published Online First: 2007/04/26]



11. da Costa BR, Nüesch E, Kasteler R, et al. Oral or transdermal opioids for osteoarthritis of the knee or hip. *Cochrane Database Syst Rev* 2014(9):Cd003115. doi: 10.1002/14651858.CD003115.pub4 [published Online First: 2014/09/18]
12. da Costa BR, Reichenbach S, Keller N, et al. Effectiveness of non-steroidal anti-inflammatory drugs for the treatment of pain in knee and hip osteoarthritis: a network meta-analysis. *Lancet* 2017;390(10090):e21-e33. doi: 10.1016/s0140-6736(17)31744-0 [published Online First: 2017/07/13]
13. Datto C, Hellmund R, Siddiqui MK. Efficacy and tolerability of naproxen/esomeprazole magnesium tablets compared with non-specific NSAIDs and COX-2 inhibitors: a systematic review and network analyses. *Open Access Rheumatol* 2013;5:1-19. doi: 10.2147/oarr.S41420 [published Online First: 2013/02/26]
14. De Vecchis R, Baldi C, Di Biase G, et al. Cardiovascular risk associated with celecoxib or etoricoxib: a meta-analysis of randomized controlled trials which adopted comparison with placebo or naproxen. *Minerva Cardioangiol* 2014;62(6):437-48. [published Online First: 2014/07/17]
15. DeRogatis M, Anis HK, Sodhi N, et al. Non-operative treatment options for knee osteoarthritis. *Ann Transl Med* 2019;7(Suppl 7):S245. doi: 10.21037/atm.2019.06.68 [published Online First: 2019/11/16]
16. Derry S, Conaghan P, Da Silva JA, et al. Topical NSAIDs for chronic musculoskeletal pain in adults. *Cochrane Database Syst Rev* 2016;4(4):Cd007400. doi: 10.1002/14651858.CD007400.pub3 [published Online First: 2016/04/23]
17. Essex MN, Zhang RY, Berger MF, et al. Safety of celecoxib compared with placebo and non-selective NSAIDs: cumulative meta-analysis of 89 randomized controlled trials. *Expert Opin Drug Saf* 2013;12(4):465-77. doi: 10.1517/14740338.2013.780595 [published Online First: 2013/03/20]
18. Freynhagen R, Elling C, Radic T, et al. Safety of tapentadol compared with other opioids in chronic pain treatment: network meta-analysis of randomized controlled and withdrawal trials. *Curr Med Res Opin* 2021;37(1):89-100. doi: 10.1080/03007995.2020.1832977 [published Online First: 2020/10/10]
19. Fuggle N, Curtis E, Shaw S, et al. Safety of Opioids in Osteoarthritis: Outcomes of a Systematic Review and Meta-Analysis. *Drugs Aging* 2019;36(Suppl 1):129-43. doi: 10.1007/s40266-019-00666-9 [published Online First: 2019/05/11]
20. Garner SE, Fidan DD, Frankish R, et al. Rofecoxib for osteoarthritis. *Cochrane Database Syst Rev* 2005(1):Cd005115. doi: 10.1002/14651858.Cd005115 [published Online First: 2005/01/18]
21. Gregori D, Giacobelli G, Minto C, et al. Association of Pharmacological Treatments With Long-term Pain Control in Patients With Knee Osteoarthritis: A Systematic Review and Meta-

- analysis. *Jama* 2018;320(24):2564-79. doi: 10.1001/jama.2018.19319 [published Online First: 2018/12/24]
22. Henriksen M, Hansen JB, Klokke L, et al. Comparable effects of exercise and analgesics for pain secondary to knee osteoarthritis: a meta-analysis of trials included in Cochrane systematic reviews. *J Comp Eff Res* 2016;5(4):417-31. doi: 10.2217/ce-2016-0007 [published Online First: 2016/06/28]
23. Honvo G, Leclercq V, Geerinck A, et al. Safety of Topical Non-steroidal Anti-Inflammatory Drugs in Osteoarthritis: Outcomes of a Systematic Review and Meta-Analysis. *Drugs Aging* 2019;36(Suppl 1):45-64. doi: 10.1007/s40266-019-00661-0 [published Online First: 2019/05/11]
24. Huang H, Luo M, Liang H, et al. Meta-analysis Comparing Celecoxib with Diclofenac Sodium in Patients with Knee Osteoarthritis. *Pain Med* 2021;22(2):352-62. doi: 10.1093/pm/pnaa230 [published Online First: 2020/08/17]
25. Jevsevar DS, Shores PB, Mullen K, et al. Mixed Treatment Comparisons for Nonsurgical Treatment of Knee Osteoarthritis: A Network Meta-analysis. *J Am Acad Orthop Surg* 2018;26(9):325-36. doi: 10.5435/jaaos-d-17-00318 [published Online First: 2018/04/25]
26. Jung SY, Jang EJ, Nam SW, et al. Comparative effectiveness of oral pharmacologic interventions for knee osteoarthritis: A network meta-analysis. *Mod Rheumatol* 2018;28(6):1021-28. doi: 10.1080/14397595.2018.1439694 [published Online First: 2018/02/13]
27. Kim D, Cho S-K, Nam SW, et al. Cardiovascular and gastrointestinal effects of etoricoxib in the treatment of osteoarthritis: a systematic review and network meta-analysis. *Journal of Rheumatic Diseases* 2017;24(5):293-302.
28. Kongtharvonskul J, Anothaisintawee T, McEvoy M, et al. Efficacy and safety of glucosamine, diacerein, and NSAIDs in osteoarthritis knee: a systematic review and network meta-analysis. *Eur J Med Res* 2015;20(1):24. doi: 10.1186/s40001-015-0115-7 [published Online First: 2015/04/19]
29. Lee C, Straus WL, Balshaw R, et al. A comparison of the efficacy and safety of nonsteroidal antiinflammatory agents versus acetaminophen in the treatment of osteoarthritis: a meta-analysis. *Arthritis Rheum* 2004;51(5):746-54. doi: 10.1002/art.20698 [published Online First: 2004/10/13]
30. Leopoldino AO, Machado GC, Ferreira PH, et al. Paracetamol versus placebo for knee and hip osteoarthritis. *Cochrane Database Syst Rev* 2019;2(2):Cd013273. doi: 10.1002/14651858.Cd013273 [published Online First: 2019/02/26]
31. Lin J, Zhang W, Jones A, et al. Efficacy of topical non-steroidal anti-inflammatory drugs in the treatment of osteoarthritis: meta-analysis of randomised controlled trials. *Bmj* 2004;329(7461):324. doi: 10.1136/bmj.38159.639028.7C [published Online First: 2004/08/03]

32. Makris UE, Kohler MJ, Fraenkel L. Adverse effects of topical nonsteroidal antiinflammatory drugs in older adults with osteoarthritis: a systematic literature review. *J Rheumatol* 2010;37(6):1236-43. doi: 10.3899/jrheum.090935 [published Online First: 2010/04/03]
33. Matchaba P, Gitton X, Krammer G, et al. Cardiovascular safety of lumiracoxib: a meta-analysis of all randomized controlled trials > or =1 week and up to 1 year in duration of patients with osteoarthritis and rheumatoid arthritis. *Clin Ther* 2005;27(8):1196-214. doi: 10.1016/j.clinthera.2005.07.019 [published Online First: 2005/10/04]
34. Miller LE, Fredericson M, Altman RD. Hyaluronic Acid Injections or Oral Nonsteroidal Anti-inflammatory Drugs for Knee Osteoarthritis: Systematic Review and Meta-analysis of Randomized Trials. *Orthop J Sports Med* 2020;8(1):2325967119897909. doi: 10.1177/2325967119897909 [published Online First: 2020/02/13]
35. Myers J, Wielage RC, Han B, et al. The efficacy of duloxetine, non-steroidal anti-inflammatory drugs, and opioids in osteoarthritis: a systematic literature review and meta-analysis. *BMC Musculoskelet Disord* 2014;15:76. doi: 10.1186/1471-2474-15-76 [published Online First: 2014/03/13]
36. Osani MC, Vaysbrot EE, Zhou M, et al. Duration of Symptom Relief and Early Trajectory of Adverse Events for Oral Nonsteroidal Antiinflammatory Drugs in Knee Osteoarthritis: A Systematic Review and Meta-Analysis. *Arthritis Care Res (Hoboken)* 2020;72(5):641-51. doi: 10.1002/acr.23884 [published Online First: 2019/03/26]
37. Osani MC, Lohmander LS, Bannuru RR. Is There Any Role for Opioids in the Management of Knee and Hip Osteoarthritis? A Systematic Review and Meta-Analysis. *Arthritis Care Res (Hoboken)* 2020 doi: 10.1002/acr.24363 [published Online First: 2020/06/26]
38. Patel PB, Patel TK. Efficacy and safety of aceclofenac in osteoarthritis: A meta-analysis of randomized controlled trials. *Eur J Rheumatol* 2017;4(1):11-18. doi: 10.5152/eurjrheum.2017.160080 [published Online First: 2017/03/16]
39. Pavelka K. A comparison of the therapeutic efficacy of diclofenac in osteoarthritis: a systematic review of randomised controlled trials. *Curr Med Res Opin* 2012;28(1):163-78. doi: 10.1185/03007995.2011.649848 [published Online First: 2011/12/16]
40. Phleps W. Overview on clinical data of dexibuprofen. *Clin Rheumatol* 2001;20 Suppl 1:S15-21. doi: 10.1007/bf03342663 [published Online First: 2002/01/05]
41. Puljak L, Marin A, Vrdoljak D, et al. Celecoxib for osteoarthritis. *Cochrane Database Syst Rev* 2017;5(5):Cd009865. doi: 10.1002/14651858.CD009865.pub2 [published Online First: 2017/05/23]
42. Richy F, Scarpignato C, Lanus A, et al. Efficacy and safety of piroxicam revisited. A global meta-analysis of randomised clinical trials. *Pharmacol Res* 2009;60(4):254-63. doi: 10.1016/j.phrs.2009.03.021 [published Online First: 2009/05/27]

43. Schoenfeld P. Gastrointestinal safety profile of meloxicam: a meta-analysis and systematic review of randomized controlled trials. *Am J Med* 1999;107(6a):48s-54s. doi: 10.1016/s0002-9343(99)00367-8 [published Online First: 2000/01/11]
44. Smith SR, Deshpande BR, Collins JE, et al. Comparative pain reduction of oral non-steroidal anti-inflammatory drugs and opioids for knee osteoarthritis: systematic analytic review. *Osteoarthritis Cartilage* 2016;24(6):962-72. doi: 10.1016/j.joca.2016.01.135 [published Online First: 2016/02/05]
45. Smith TO, Zou K, Abdullah N, et al. Does flare trial design affect the effect size of non-steroidal anti-inflammatory drugs in symptomatic osteoarthritis? A systematic review and meta-analysis. *Ann Rheum Dis* 2016;75(11):1971-78. doi: 10.1136/annrheumdis-2015-208823 [published Online First: 2016/02/18]
46. Stewart M, Cibere J, Sayre EC, et al. Efficacy of commonly prescribed analgesics in the management of osteoarthritis: a systematic review and meta-analysis. *Rheumatol Int* 2018;38(11):1985-97. doi: 10.1007/s00296-018-4132-z [published Online First: 2018/08/19]
47. Taylor RS, Fotopoulos G, Maibach H. Safety profile of topical diclofenac: a meta-analysis of blinded, randomized, controlled trials in musculoskeletal conditions. *Curr Med Res Opin* 2011;27(3):605-22. doi: 10.1185/03007995.2010.550606 [published Online First: 2011/01/15]
48. Toupin April K, Bisailon J, Welch V, et al. Tramadol for osteoarthritis. *Cochrane Database Syst Rev* 2019;5(5):Cd005522. doi: 10.1002/14651858.CD005522.pub3 [published Online First: 2019/05/28]
49. Towheed TE, Hochberg MC. A systematic review of randomized controlled trials of pharmacological therapy in osteoarthritis of the knee, with an emphasis on trial methodology. *Semin Arthritis Rheum* 1997;26(5):755-70. doi: 10.1016/s0049-0172(97)80043-1 [published Online First: 1997/04/01]
50. Towheed TE. Pennsaid therapy for osteoarthritis of the knee: a systematic review and metaanalysis of randomized controlled trials. *J Rheumatol* 2006;33(3):567-73. [published Online First: 2006/03/03]
51. Towheed TE, Maxwell L, Judd MG, et al. Acetaminophen for osteoarthritis. *Cochrane Database Syst Rev* 2006(1):Cd004257. doi: 10.1002/14651858.CD004257.pub2 [published Online First: 2006/01/27]
52. van Walsem A, Pandhi S, Nixon RM, et al. Relative benefit-risk comparing diclofenac to other traditional non-steroidal anti-inflammatory drugs and cyclooxygenase-2 inhibitors in patients with osteoarthritis or rheumatoid arthritis: a network meta-analysis. *Arthritis Res Ther* 2015;17(1):66. doi: 10.1186/s13075-015-0554-0 [published Online First: 2015/04/17]
53. Welsch P, Petzke F, Klose P, et al. Opioids for chronic osteoarthritis pain: An updated systematic review and meta-analysis of efficacy, tolerability and safety in randomized placebo-

- controlled studies of at least 4 weeks double-blind duration. *Eur J Pain* 2020;24(4):685-703. doi: 10.1002/ejp.1522 [published Online First: 2019/12/27]
54. Wiffen PJ, Xia J. Systematic review of topical diclofenac for the treatment of acute and chronic musculoskeletal pain. *Curr Med Res Opin* 2020;36(4):637-50. doi: 10.1080/03007995.2020.1716703 [published Online First: 2020/01/17]
55. Wolff DG, Christophersen C, Brown SM, et al. Topical nonsteroidal anti-inflammatory drugs in the treatment of knee osteoarthritis: a systematic review and meta-analysis. *Phys Sportsmed* 2021:1-11. doi: 10.1080/00913847.2021.1886573 [published Online First: 2021/02/09]
56. Zeng C, Doherty M, Persson MSM, et al. Comparative efficacy and safety of acetaminophen, topical and oral non-steroidal anti-inflammatory drugs for knee osteoarthritis: evidence from a network meta-analysis of randomized controlled trials and real-world data. *Osteoarthritis Cartilage* 2021 doi: 10.1016/j.joca.2021.06.004 [published Online First: 2021/06/27]
57. Zeng C, Wei J, Persson MSM, et al. Relative efficacy and safety of topical non-steroidal anti-inflammatory drugs for osteoarthritis: a systematic review and network meta-analysis of randomised controlled trials and observational studies. *Br J Sports Med* 2018;52(10):642-50. doi: 10.1136/bjsports-2017-098043 [published Online First: 2018/02/14]
58. Zhang W, Robertson J, Jones AC, et al. The placebo effect and its determinants in osteoarthritis: meta-analysis of randomised controlled trials. *Ann Rheum Dis* 2008;67(12):1716-23. doi: 10.1136/ard.2008.092015 [published Online First: 2008/06/11]
59. Zhang W, Jones A, Doherty M. Does paracetamol (acetaminophen) reduce the pain of osteoarthritis? A meta-analysis of randomised controlled trials. *Ann Rheum Dis* 2004;63(8):901-7. doi: 10.1136/ard.2003.018531 [published Online First: 2004/03/17]
60. Zhang X, Li X, Xiong Y, et al. Efficacy and safety of tramadol for knee or hip osteoarthritis: a systematic review and network meta-analysis of randomized controlled trials. *Arthritis Care Res (Hoboken)* 2021 doi: 10.1002/acr.24750 [published Online First: 2021/07/13]
61. Zhu X, Wu D, Sang L, et al. Comparative effectiveness of glucosamine, chondroitin, acetaminophen or celecoxib for the treatment of knee and/or hip osteoarthritis: a network meta-analysis. *Clin Exp Rheumatol* 2018;36(4):595-602. [published Online First: 2018/02/22]

#### **Web-appendix 4. Definitions used to classify trials according to components of methodological quality**

##### **Random sequence allocation**

We considered trials as being at low risk of bias for random sequence allocation when an adequate method of randomization was used: computer-generated methods, use of random number tables, drawing of lots, among others - as per Cochrane's recommendations. Trials that used one of the following methods were judged as having a high risk of bias for random sequence allocation: pseudo-randomization based on dates (birth, admission, any other), hospital/clinical record number, or any methods not considered adequate as per Cochrane's recommendations. Trials with insufficient information to judge random sequence generation methods were classified as having "unclear risk of bias" for this domain.

##### **Concealment of allocation**

We considered allocation concealment adequate if the investigators responsible for patient selection were unable to suspect before allocation which treatment was next. Methods considered adequate included central randomization, coded drugs, and sequentially numbered, sealed, opaque envelopes. Concealment was downgraded to inadequate if there was evidence of inadequate sequence generation.

##### **Blinding of patients**

We considered blinding of patients adequate if a trial was placebo-controlled, if interventions were described as indistinguishable, or if double-dummy technique was used.

##### **Blinding of therapist**

We considered blinding of therapists adequate if it was explicitly mentioned in the text that therapists were blinded.

##### **Blinding of assessor (outcome assessor)**

Pain and function scales such as the Visual Analogue Scale (VAS), WOMAC, and Lequesne are self-administered tools; that is, the patients will respond to the questionnaire. Typically, therapists will not be involved or greatly influence this assessment. If there was a "low risk of bias" in the blinding of patients, blinding of outcome assessor was considered as being at a "low risk of bias" too. If patients were not blinded and patient-reported outcomes were used, blinding of outcome assessor was considered at a "high risk of bias." Outcome assessment was considered to be blinded if self-report outcomes were employed AND

blinding of patients was considered adequate, AND there was no information to suggest that there was an investigator involved during the process of outcome assessment. Also, we will judge as in "low risk of bias" if blinding of investigators performing the outcome assessment was reported AND an attempt to blind patients was reported. We chose this option if outcome assessors (interviewers) were explicitly described as being blinded. Open-label trials were considered at a "high risk of bias" if pain/function was measured by the physician's global assessment, and they were not blinded to patient's allocation. If the information is not sufficient to judge, trials were deemed as "unclear risk of bias" for this domain.

### **Incomplete outcome data**

Trials that performed a bona fide intention-to-treat analysis were considered at low risk of bias. We considered trials at a high-risk of bias when reports explicitly mentioned that patients were excluded after randomization or when the number of patients analyzed at six weeks (or the closest time point) differed from the number of patients randomized

### Web-appendix 5. Description of the main model of analysis (Random walk)

The assumption that the standardized effects at each timepoint are fully exchangeable around a common standardized effect may be considered too restrictive, especially when the course of the disease has a potential temporal pattern. We may weaken this assumption by using a (first order) random walk. A random walk of first order assumes that any adjacent standardized effects are more similar to each other than non-adjacent standardized effects. Therefore, if there is an underlying temporal pattern, a random walk model may capture this more appropriately than a full exchangeability model.

We use the following notation:

- $i$  denotes the study
- $k$  denotes the study arm
- $t$  denotes the timepoint
- $trt(i, k)$  denotes the treatment in arm  $k$  in study  $i$
- $bsl(i)$  denotes the “baseline” treatment in study  $i$
- $g = 1, 2, \dots$ , are the treatments
- $x_i$  is a covariate on the study-level (e.g. adequate blinding)

In mathematical terms, the model is then written as follows:

$$seff_{itk} | \theta_{itk}, se_{itk} \sim N(\theta_{itk}, se_{itk}^2)$$

for  $t > 1$

$$\theta_{itk} | \theta_{i(t-1)k}, \tau_{time} \sim N(\theta_{i(t-1)k}, \tau_{time}^2)$$

and

$$\theta_{i1k} = \begin{cases} \mu_i & \text{if } trt(i, k) = bsl(i) \\ \mu_i + \delta_{ik} & \text{else} \end{cases}$$

$$\delta_{ik} | d_{trt(i,k)}, d_{bsl(i)}, \tau_{RE} \sim N(d_{trt(i,k)} - d_{bsl(i)} + \beta * x_i, \tau_{RE}^2)$$

Furthermore, the following prior distributions were used:

$$\mu_i \sim N(0, 1000)$$

$$d_g \sim N(0, 1000)$$

$$\beta \sim N(0, 1000)$$

$$\tau_{time} \sim U(0, 5)$$

$$\tau_{RE}^{-2} \sim G(0.1, 0.1) I_{(0, 2000)}$$



We note a few points with respect to this model:

- $\theta_{itk}$  is the estimated standardized effect of arm  $k$  in study  $i$  at timepoint  $t$
- $\tau_{time}^2$  is the variance determining how close two adjacent  $\theta_{itk}$  are to each other
- $\mu_i$  is the baseline effect at time 1 in study  $i$
- $\delta_{ik}$  is the treatment effect at time 1 in study  $i$
- $d_g$  is the overall (treatment) effect at timepoint 1
- An adjustment for multi-arm trials based on the approach proposed by Cooper et al was done (for simplification, this is omitted in the model formulation above)

One advantage of such (or any similar model) is that it can handle incomplete data structures, i.e. also in studies for which outcome data was reported only for some of the timepoints of interest. In a Bayesian framework, such an incomplete data structure does not pose a problem. For example, studies which only reported outcomes at later timepoints ( $t > 1$ ) will contribute less to the estimated treatment effect  $d_g$  since they are naturally down-weighted through the random walk structure.

One challenge with such a model is that the estimated overall treatment effects corresponds to timepoint 1. Thus, we performed our main analysis using timepoint 4 (week 6) as the reference timepoint and performed a sensitivity analysis with timepoints 1 (week 1) and 6 (week 12) as the reference.

OpenBUGS code used for random walk model (timepoint 4 as reference)<sup>1</sup>:

```
model {  
  
  for(i in 1:nobs){  
  
    # Categorical timepoint 4 corresponds to 6 weeks  
    prec.t[i,4] <- pow(set[i,4],-2)  
    sefft[i,4] ~ dnorm(mean.t[i,4],prec.t[i,4])  
    mean.t[i,4] <- mu[trial[i]] + delta[trial[i],arm[i]]  
    rest[i,4] <- (mean.t[i,4] - sefft[i,4])  
    dev[i,4] <- (sefft[i,4]-mean.t[i,4])*(sefft[i,4]-mean.t[i,4])*prec.t[i,4]  
  
    for(k in 1:3){  
      prec.t[i,k] <- pow(set[i,k],-2)    }  
  }  
}
```

---

<sup>1</sup> The code includes one additional prior for the between-trial heterogeneity that we used to assess sensitivity of the analysis to the prior distribution. This additional analysis showed similar results.

## Comparative effectiveness of non-steroidal anti-inflammatory drugs and opioid therapy

```
sefft[i,k] ~ dnorm(mean.t[i,k],prec.t[i,k])
mean.t[i,k] ~ dnorm(mean.t[i,k+1],prec.RW[k])
rest[i,k] <- (mean.t[i,k] - sefft[i,k])
dev[i,k] <- (sefft[i,k]-mean.t[i,k])*(sefft[i,k]-mean.t[i,k])*prec.t[i,k]
}

for(k in 5:n.times){
  prec.t[i,k] <- pow(set[i,k],-2)
  sefft[i,k] ~ dnorm(mean.t[i,k],prec.t[i,k])
  mean.t[i,k] ~ dnorm(mean.t[i,k-1],prec.RW[k])
  rest[i,k] <- (mean.t[i,k] - sefft[i,k])
  dev[i,k] <- (sefft[i,k]-mean.t[i,k])*(sefft[i,k]-mean.t[i,k])*prec.t[i,k]
}
resdev[i] <- sum(dev[i, 1:n.times])
}

totresdev <- sum(resdev[])

for (j in 1:ns){
  mu[j] ~ dnorm(0,0.001)
  delta[j, 1] <- 0
  w[j, 1] <- 0

  for (k in 2:na[j]){
    delta[j,k] ~ dnorm(md[j,k],tau[j,k])
    md[j,k] <- d[t.s[j,k]] - d[t.s[j, 1]] + sw[j,k] + beta*x[j]
    tau[j,k] <- 2*tau.re*(k-1)/k
    w[j,k] <- delta[j,k] - (d[t.s[j,k]] - d[t.s[j, 1]] + beta*x[j])
    sw[j,k] <- sum(w[j, 1:(k-1)])/(k-1)
  }
}

d[1] <- 0
for (k in 2:nt){
  d[k] ~ dnorm(0,0.001)
}

beta ~ dnorm(0,0.001)
```

```

prec.RW[4] <- 0
indep[4] <- 0

for(i in 1:3){
  sd.RW[i] <- pow(prec.RW[i], -0.5)
  prec.RW[i] <- prec.RW.which[i,indep[i]]
  prec.RW.which[i,1] <- prec.RW.common
  prec.RW.which[i,2] <- pow(sd.RW.indep[i], -2)
  sd.RW.indep[i] ~ dunif(0, 5)
}

for(i in 5:n.times){
  sd.RW[i] <- pow(prec.RW[i], -0.5)
  prec.RW[i] <- prec.RW.which[i,indep[i]]
  prec.RW.which[i,1] <- prec.RW.common
  prec.RW.which[i,2] <- pow(sd.RW.indep[i], -2)
  sd.RW.indep[i] ~ dunif(0, 5)
}

prec.RW.common <- pow(sd.RW.common, -2)
sd.RW.common ~ dunif(0,5)

  # Gamma prior
  tau.re ~ dgamma(0.1,0.1)|(,2000)
  tausq <- 1/tau.re
}

```

In order to model a treatment specific dose-response relationship, for each preparation the maximum approved dose for the indication “osteoarthritis” was defined as the reference dose. The treatment effect  $d$  is with respect to this reference dose, and for the remaining doses of the preparation, the respective treatment effect was defined as

- $d'_g = \gamma_g * \log\left(\frac{dose'}{referencedose}\right)$

Non-informative prior distributions (normal with mean 0 and variance 1000) were given for the parameters  $\gamma_g$ .

## Web-appendix 6. Imputation of missing standard deviations

When summary statistics were insufficient to approximate the standard deviation, we imputed arm-specific standard deviations based on a restricted cubic spline regression model [1]. We used a large database including data from 388 large OA trials, and assumed a non-linear relationship between time point (weeks) and the magnitude of the standard deviation.

The database of large OA trials has been assembled based on previous projects conducted by our research group [2-6], and included only large OA trials selected with identical eligibility criteria compared to the trials whose standard deviations were imputed. A myriad of interventions were included in this database: physical therapy, exercise, corticosteroids, hyaluronic acid, among others [2-6].

Different scales (e.g., WOMAC, Lesquene, overall pain) and approaches (e.g., visual analog scale, Likert, numeric rating scale) were used across trials to measure pain and physical function. Thus, arm-specific standard deviations were rescaled in [0,1] by dividing the standard deviation by the range of the scale. Next, assuming  $n$  independent trial arms, the arm-level standard deviation was modeled as:

$$sd = \mathbf{C}\beta + \mathbf{S}\gamma + \mathbf{A}\lambda + \mathbf{T}\pi + \epsilon$$

where  $\mathbf{C}$  is a  $n \times k + 1$  matrix, in which the first column of 1's is followed by  $k$  columns containing the  $k$  cubic splines variables.  $\mathbf{S}$  is the  $n \times s - 1$  matrix containing dummy variables for the  $s$  different scales and  $\mathbf{A}$  is the  $n \times a - 1$  matrix containing dummy variables for the  $a$  different approaches.  $\mathbf{T}$  is the matrix containing the values for timepoints (in weeks).  $\beta$ ,  $\gamma$ ,  $\lambda$  and  $\pi$  are the vectors of parameters to be estimated. Finally,  $\epsilon$  is the error vector whose  $i^{\text{th}}$  element is  $\overset{iid}{\sim} N(0, \sigma_{sd}^2)$ .

We used 8 knots covering the entire distribution of time points to ensure sufficient data points in each interval [1]. Specifically, we set the knots at 0,1,4,6,12,16,25,30 and 52 weeks.

The hypothesis of non-linearity was formally using a likelihood-ratio (LR) test. Specifically, the log-likelihood of the full model (including the complete set of cubic splines variables with the linear term) was compared to the log-likelihood of the nested model with the linear term only. The LR test was obtained by  $-2\log\text{-likelihood}_{[\text{nested model}]} - 2\log\text{-likelihood}_{[\text{full model}]}$ . The model with the cubic splines components improved significantly the overall fit of the model when compared to the model without the cubic splines variables (chi-squared = 111.7 on 7 degrees-of-freedom,  $P < 0.0001$ ).

We performed a sensitivity analysis in which a smaller number of knots were used. Different models with varying degrees-of-freedom (3 to 7 knots) were tested using Akaike's information criterion and Bayesian information criterion (BIC), with smaller values of AIC and

## Comparative effectiveness of non-steroidal anti-inflammatory drugs and opioid therapy

BIC preferred. Our results indicated that the model with 8 knots provided the best fit, in which the difference between the 8-knot model vs less complex models was  $> 2$  in all comparisons.

## References

- [1] Harrell JFE. Regression modeling strategies. Springer; 2015.
- [2] da Costa, B. R., Nüesch, E., Rutjes, A. W., et al. (2013). Combining follow-up and change data is valid in meta-analyses of continuous outcomes: a meta-epidemiological study. *Journal of clinical epidemiology*, 66(8), 847-855.
- [3] Rutjes, A. W., Jüni, P., da Costa, B. R., Trelle, S., Nüesch, E., & Reichenbach, S. (2012). Viscosupplementation for osteoarthritis of the knee: a systematic review and meta-analysis. *Annals of internal medicine*, 157(3), 180-191.
- [4] da Costa, B. R., Reichenbach, S., Keller, N., Nartey, L., Wandel, S., Jüni, P., & Trelle, S. (2017). Effectiveness of non-steroidal anti-inflammatory drugs for the treatment of pain in knee and hip osteoarthritis: a network meta-analysis. *The Lancet*, 390(10090), e21-e33.
- [5] da Costa, B. R., Nüesch, E., Kasteler, R., Husni, E., Welch, V., Rutjes, A. W., & Jüni, P. (2014). Oral or transdermal opioids for osteoarthritis of the knee or hip. *Cochrane Database of Systematic Reviews*, (9).
- [6] da Costa, B. R., Saadat, P., Basciani, R. M., Agarwal, A., Johnston, B. C., & Jüni, P. (2021). Visual Analogue Scale has higher assay sensitivity than WOMAC pain in detecting between-group differences in treatment effects: a meta-epidemiological study. *Osteoarthritis and cartilage*. 29(3):304-312.

**Web-appendix 7. Treatment effect estimates for pain, physical function, and adverse events, as compared to oral placebo**

|                             | No. of participants | Pain                   |         | Function               | Dropouts due to AEs   | Any AEs             | Serious AEs          |
|-----------------------------|---------------------|------------------------|---------|------------------------|-----------------------|---------------------|----------------------|
|                             |                     | ES (95% CrI)           | Pr(MID) | ES (95% CrI)           | OR (95% CrI)          | OR (95% CrI)        | OR (95% CrI)         |
| <b>Paracetamol</b>          |                     |                        |         |                        |                       |                     |                      |
| Paracetamol <2000mg         | 158                 | -0.07 (-0.56 to 0.44)  | 11.8    | 0.04 (-0.42 to 0.50)   | 1.51 (0.58 to 3.72)   | 1.22 (0.75 to 1.98) | 1.60 (0.28 to 8.71)  |
| Paracetamol 3000mg          | 442                 | -0.21 (-0.81 to 0.39)  | 29.7    | -0.26 (-0.80 to 0.30)  | 1.31 (0.56 to 3.12)   | 1.25 (0.71 to 2.21) | -                    |
| Paracetamol 3900-4000mg*    | 2614                | -0.15 (-0.25 to -0.05) | 0.0     | -0.15 (-0.25 to -0.05) | 1.35 (1.00 to 1.81)** | 1.19 (0.99 to 1.42) | 1.67 (0.82 to 3.52)  |
| <b>NSAIDs - Oral</b>        |                     |                        |         |                        |                       |                     |                      |
| Aceclofenac 200mg*          | 1179                | -0.56 (-0.78 to -0.34) | 95.1    | -0.54 (-0.76 to -0.31) | 1.42 (0.92 to 2.21)   | 1.10 (0.72 to 1.66) | -                    |
| Celecoxib 100mg             | 419                 | -0.10 (-0.26 to 0.06)  | 0.0     | -0.17 (-0.42 to 0.09)  | 0.83 (0.52 to 1.34)   | 1.12 (0.83 to 1.52) | 0.18 (0.01 to 1.31)  |
| Celecoxib 200mg             | 11362               | -0.35 (-0.40 to -0.30) | 20.0    | -0.35 (-0.40 to -0.30) | 1.04 (0.90 to 1.21)   | 1.06 (0.97 to 1.16) | 0.97 (0.69 to 1.38)  |
| Celecoxib 400mg*            | 661                 | -0.32 (-0.47 to -0.16) | 24.7    | -0.38 (-0.62 to -0.13) | 1.08 (0.70 to 1.67)   | 1.08 (0.83 to 1.41) | 1.19 (0.32 to 4.15)  |
| Diclofenac ≤75mg            | 519                 | -0.42 (-0.65 to -0.18) | 65.1    | -0.27 (-0.77 to 0.23)  | 2.64 (1.53 to 4.65)   | 1.37 (0.71 to 2.70) | 1.54 (0.32 to 7.23)  |
| Diclofenac 100-105mg        | 2113                | -0.47 (-0.63 to -0.31) | 88.4    | -0.44 (-0.65 to -0.24) | 1.48 (1.12 to 1.97)   | 1.19 (0.93 to 1.51) | 1.10 (0.52 to 2.44)  |
| Diclofenac 114-133mg        | 812                 | -0.64 (-1.40 to 0.11)  | 75.9    | -                      | 1.79 (0.74 to 4.42)   | 1.42 (0.74 to 2.73) | -                    |
| Diclofenac 150mg*           | 3709                | -0.56 (-0.68 to -0.45) | 99.9    | -0.47 (-0.59 to -0.35) | 1.67 (1.31 to 2.13)   | 1.27 (1.03 to 1.56) | 2.71 (0.93 to 8.29)  |
| Diflunisal 750mg            | 139                 | -0.33 (-0.69 to 0.03)  | 41.2    | -                      | 0.94 (0.35 to 2.50)   | 1.22 (0.64 to 2.31) | -                    |
| Diflunisal 1000mg           | 140                 | -0.40 (-0.77 to -0.04) | 57.0    | -                      | 1.97 (0.83 to 4.79)   | 1.34 (0.71 to 2.53) | -                    |
| Etodolac 600mg              | 454                 | -0.57 (-0.83 to -0.31) | 93.1    | -0.22 (-0.60 to 0.15)  | 1.22 (0.67 to 2.26)   | 0.95 (0.62 to 1.45) | -                    |
| Etoricoxib 5-10mg           | 231                 | -0.21 (-0.43 to 0.02)  | 7.5     | -                      | 0.65 (0.19 to 2.01)   | -                   | 1.62 (0.29 to 10.91) |
| Etoricoxib 30mg             | 1135                | -0.48 (-0.63 to -0.34) | 94.3    | -0.43 (-0.60 to -0.26) | 0.88 (0.58 to 1.33)   | 1.21 (0.96 to 1.51) | 0.52 (0.22 to 1.21)  |
| Etoricoxib 60mg*            | 939                 | -0.65 (-0.82 to -0.48) | 99.9    | -0.48 (-0.69 to -0.28) | 1.02 (0.62 to 1.68)   | 1.56 (1.12 to 2.22) | 0.89 (0.32 to 2.48)  |
| Etoricoxib 90mg             | 307                 | -0.84 (-1.09 to -0.59) | 100.0   | -                      | 1.58 (0.80 to 3.11)   | -                   | 2.92 (0.52 to 17.43) |
| Ibuprofen 400mg             | 82                  | -                      | -       | -                      | 0.44 (0.09 to 1.46)   | 0.89 (0.46 to 1.68) | 1.91 (0.05 to 76.48) |
| Ibuprofen 1200mg            | 1055                | -0.31 (-0.92 to 0.30)  | 42.1    | -0.41 (-0.96 to 0.16)  | 0.99 (0.39 to 2.53)   | 1.07 (0.72 to 1.59) | -                    |
| Ibuprofen 2400mg*           | 1208                | -0.37 (-0.50 to -0.25) | 52.8    | -0.36 (-0.49 to -0.23) | 1.80 (1.23 to 2.60)   | 1.44 (1.10 to 1.90) | 1.14 (0.36 to 3.64)  |
| Indomethacin 75mg           | 356                 | -0.30 (-0.74 to 0.14)  | 37.6    | -                      | -                     | -                   | -                    |
| Indomethacin 105mg          | 113                 | -                      | -       | -                      | 1.81 (1.05 to 3.20)   | 1.72 (1.06 to 2.81) | -                    |
| Indomethacin 150mg          | 123                 | -                      | -       | -                      | 2.49 (0.74 to 8.49)   | -                   | -                    |
| Indomethacin 210mg*         | 110                 | -                      | -       | -                      | 3.21 (1.08 to 10.03)  | 1.88 (0.79 to 4.45) | -                    |
| Isoxicam 200mg <sup>†</sup> | 391                 | -0.59 (-1.08 to -0.09) | 80.6    | -                      | 1.26 (0.58 to 2.69)   | -                   | -                    |
| Isoxicam 300mg <sup>†</sup> | 112                 | -                      | -       | -                      | 5.61 (1.81 to 18.32)  | 1.67 (0.63 to 4.58) | -                    |
| Ketoprofen 200mg*           | 118                 | -0.60 (-1.06 to -0.13) | 83.0    | -                      | 0.82 (0.31 to 2.09)   | 1.24 (0.60 to 2.55) | -                    |
| Lornoxicam 16mg*            | 137                 | -0.73 (-1.32 to -0.14) | 88.1    | -0.61 (-1.16 to -0.05) | -                     | 0.96 (0.45 to 2.03) | -                    |
| Lumiracoxib 100mg           | 2165                | -0.33 (-0.52 to -0.13) | 33.8    | -0.34 (-0.56 to -0.12) | 0.88 (0.61 to 1.26)   | 1.32 (1.08 to 1.61) | 1.12 (0.59 to 2.19)  |
| Lumiracoxib 200mg*          | 1409                | -0.36 (-0.54 to -0.19) | 46.1    | -0.39 (-0.57 to -0.21) | 0.97 (0.66 to 1.41)   | 1.14 (0.91 to 1.43) | 1.03 (0.49 to 2.31)  |
| Lumiracoxib 400mg           | 1404                | -0.39 (-0.59 to -0.18) | 55.9    | -0.41 (-0.66 to -0.17) | 1.06 (0.71 to 1.57)   | 1.14 (0.90 to 1.45) | 0.90 (0.40 to 2.02)  |
| Meclofenamate sodium 300mg  | 211                 | -0.31 (-0.88 to 0.25)  | 41.8    | -                      | 1.82 (0.71 to 4.84)   | 1.50 (0.87 to 2.58) | -                    |
| Meloxicam ≤10mg             | 886                 | -0.33 (-0.52 to -0.13) | 33.9    | -0.27 (-0.46 to -0.08) | 0.97 (0.61 to 1.52)   | 1.15 (0.79 to 1.66) | 0.42 (0.06 to 2.41)  |
| Meloxicam 15mg*             | 1184                | -0.48 (-0.66 to -0.30) | 88.2    | -0.39 (-0.59 to -0.19) | 1.13 (0.75 to 1.69)   | 1.16 (0.85 to 1.59) | 1.37 (0.24 to 8.76)  |

Comparative effectiveness of non-steroidal anti-inflammatory drugs and opioid therapy

|                                       |      |                        |      |                        |                       |                       |                      |
|---------------------------------------|------|------------------------|------|------------------------|-----------------------|-----------------------|----------------------|
| Nabumetone 1000mg                     | 1034 | -0.22 (-0.37 to -0.08) | 2.3  | 0.12 (-0.19 to 0.44)   | 1.04 (0.68 to 1.59)   | 0.99 (0.76 to 1.30)   | 1.12 (0.40 to 3.27)  |
| Nabumetone 1327mg                     | 191  | -                      | -    | -                      | 1.00 (0.33 to 3.05)   | 1.03 (0.45 to 2.38)   | -                    |
| Nabumetone 1500-1831mg                | 1399 | -0.41 (-0.89 to 0.08)  | 56.3 | -0.65 (-1.23 to -0.07) | 1.05 (0.73 to 1.51)   | 1.31 (0.96 to 1.83)   | -                    |
| Naproxcinod 250mg                     | 111  | 0.04 (-0.21 to 0.29)   | 0.1  | -0.04 (-0.29 to 0.21)  | 0.63 (0.17 to 1.82)   | -                     | -                    |
| Naproxcinod 750mg                     | 708  | -0.31 (-0.43 to -0.19) | 16.6 | -0.35 (-0.48 to -0.23) | 1.41 (0.80 to 2.42)   | 1.06 (0.79 to 1.42)   | 0.35 (0.09 to 1.02)  |
| Naproxcinod 1500mg                    | 1468 | -0.44 (-0.54 to -0.34) | 92.2 | -0.48 (-0.58 to -0.38) | 1.37 (0.93 to 1.99)   | 1.23 (0.99 to 1.52)   | 1.12 (0.56 to 2.21)  |
| Naproxcinod 2250mg                    | 124  | -0.47 (-0.73 to -0.22) | 77.9 | -0.53 (-0.78 to -0.28) | -                     | -                     | 0.58 (0.02 to 5.58)  |
| Naproxen ≤750mg                       | 2370 | -0.38 (-0.63 to -0.13) | 52.3 | -0.31 (-0.58 to -0.05) | 1.33 (0.89 to 2.02)   | 1.48 (1.17 to 1.87)   | 1.15 (0.30 to 4.41)  |
| Naproxen 1000mg*                      | 5869 | -0.39 (-0.45 to -0.32) | 68.1 | -0.43 (-0.50 to -0.36) | 1.50 (1.24 to 1.83)   | 1.39 (1.23 to 1.57)   | 1.03 (0.67 to 1.61)  |
| Nimesulide 200mg*                     | 418  | -0.35 (-0.65 to -0.06) | 45.7 | -0.35 (-0.69 to 0.01)  | 1.29 (0.67 to 2.45)   | 1.17 (0.78 to 1.76)   | 2.77 (0.52 to 15.60) |
| Nimesulide 800mg                      | 146  | -0.44 (-0.93 to 0.05)  | 61.0 | -0.43 (-0.90 to 0.02)  | 0.84 (0.28 to 2.32)   | 1.10 (0.57 to 2.09)   | 1.06 (0.03 to 48.52) |
| Oxaprozin 1200mg                      | 393  | -0.61 (-0.89 to -0.32) | 94.6 | -0.42 (-0.72 to -0.10) | 1.57 (0.89 to 2.74)   | 1.98 (1.32 to 2.97)   | 0.90 (0.02 to 32.98) |
| Oxaprozin 1800mg*                     | 81   | -                      | -    | -                      | 2.02 (0.80 to 4.87)   | 2.92 (1.58 to 5.45)   | 1.96 (0.05 to 71.09) |
| Piroxicam 20mg                        | 2183 | -0.48 (-0.67 to -0.28) | 86.4 | -0.37 (-0.59 to -0.15) | 1.32 (0.88 to 1.97)   | 1.41 (1.04 to 1.91)   | 1.27 (0.21 to 7.71)  |
| Piroxicam 25.5mg                      | 147  | -0.53 (-1.43 to 0.37)  | 63.2 | -                      | 2.26 (0.98 to 5.19)   | -                     | -                    |
| Polmacoxib 2mg                        | 146  | -0.28 (-0.55 to -0.02) | 24.9 | -0.28 (-0.54 to -0.03) | 3.66 (1.28 to 11.99)  | 2.02 (1.12 to 3.63)   | 5.28 (0.93 to 47.47) |
| Rofecoxib 5mg <sup>††</sup>           | 149  | -0.34 (-0.60 to -0.09) | 42.2 | -0.38 (-0.63 to -0.13) | 1.41 (0.44 to 3.93)   | -                     | -                    |
| Rofecoxib 12.5mg <sup>††</sup>        | 3554 | -0.41 (-0.49 to -0.33) | 86.3 | -0.39 (-0.48 to -0.30) | 1.22 (0.96 to 1.54)   | 1.19 (1.00 to 1.42)** | 1.16 (0.63 to 2.21)  |
| Rofecoxib 25mg* <sup>††</sup>         | 3330 | -0.48 (-0.55 to -0.40) | 99.6 | -0.49 (-0.56 to -0.41) | 1.32 (1.04 to 1.68)   | 1.25 (1.04 to 1.50)   | 1.23 (0.63 to 2.39)  |
| Rofecoxib 50mg <sup>††</sup>          | 97   | -0.77 (-1.05 to -0.49) | 99.8 | -0.62 (-0.90 to -0.33) | 1.84 (0.54 to 5.35)   | -                     | -                    |
| Tiaprofenic acid 600mg*               | 307  | -0.27 (-0.74 to 0.22)  | 33.5 | -                      | 1.47 (0.84 to 2.63)   | 1.55 (0.98 to 2.45)   | -                    |
| Tolfenamic acid 600mg                 | 116  | -0.65 (-1.45 to 0.13)  | 76.0 | -                      | 1.80 (0.41 to 8.37)   | 1.80 (0.66 to 5.22)   | -                    |
| Valdecoxib 5mg <sup>††</sup>          | 321  | -0.29 (-0.47 to -0.11) | 18.8 | -0.32 (-0.49 to -0.15) | 1.09 (0.43 to 2.57)   | 1.23 (0.72 to 2.09)   | -                    |
| Valdecoxib 10mg <sup>††</sup>         | 317  | -0.32 (-0.50 to -0.14) | 29.4 | -0.41 (-0.59 to -0.24) | 1.33 (0.54 to 3.12)   | 0.99 (0.58 to 1.68)   | -                    |
| Valdecoxib 20mg <sup>††</sup>         | 202  | -0.37 (-0.59 to -0.14) | 48.5 | -0.33 (-0.55 to -0.11) | -                     | -                     | -                    |
| Zaltoprofen 240mg*                    | 105  | -0.78 (-1.39 to -0.17) | 90.7 | -0.56 (-1.13 to 0.01)  | 4.01 (0.29 to 135.37) | 2.13 (1.02 to 4.49)   | -                    |
| <b>NSAIDs - Topical</b>               |      |                        |      |                        |                       |                       |                      |
| Diclofenac topical 70-81mg            | 987  | -0.54 (-0.77 to -0.31) | 92.3 | -0.47 (-0.70 to -0.25) | 1.14 (0.74 to 1.72)   | 1.03 (0.72 to 1.47)   | -                    |
| Diclofenac topical 140-160mg          | 3124 | -0.61 (-0.87 to -0.35) | 96.3 | -0.55 (-0.82 to -0.27) | 1.58 (0.77 to 3.34)   | 1.17 (0.84 to 1.63)   | 3.35 (0.45 to 35.30) |
| S-flurbiprofen plaster ≤20mg          | 248  | -0.25 (-0.92 to 0.42)  | 36.2 | -0.31 (-0.95 to 0.31)  | 0.40 (0.03 to 4.14)   | 1.19 (0.57 to 2.53)   | -                    |
| S-flurbiprofen plaster 40mg           | 134  | -0.41 (-1.20 to 0.37)  | 53.9 | -0.48 (-1.21 to 0.25)  | 0.32 (0.01 to 3.82)   | 1.40 (0.63 to 3.12)   | -                    |
| Ibuprofen topical 1500mg              | 138  | -0.19 (-1.03 to 0.66)  | 33.7 | -0.43 (-1.19 to 0.35)  | -                     | -                     | -                    |
| Ketoprofen topical 50mg               | 223  | -0.15 (-0.64 to 0.33)  | 18.7 | -0.06 (-0.52 to 0.39)  | 0.67 (0.25 to 1.65)   | 0.98 (0.61 to 1.59)   | -                    |
| Ketoprofen topical 100mg              | 456  | -0.22 (-0.49 to 0.06)  | 14.1 | -0.18 (-0.45 to 0.09)  | 0.99 (0.44 to 2.15)   | 1.07 (0.72 to 1.61)   | -                    |
| Ketoprofen topical 200-220mg          | 863  | -0.23 (-0.39 to -0.06) | 4.4  | -0.21 (-0.37 to -0.05) | 1.27 (0.79 to 2.02)   | 1.09 (0.82 to 1.45)   | 0.71 (0.18 to 2.66)  |
| Piroxicam topical 15mg*               | 117  | 0.39 (-0.49 to 1.25)   | 4.3  | -0.41 (-1.21 to 0.40)  | 1.32 (0.31 to 5.74)   | 1.31 (0.59 to 2.89)   | -                    |
| Piroxicam topical 20mg                | 124  | -                      | -    | -                      | -                     | 6.03 (0.71 to 169.69) | -                    |
| <b>Opioids</b>                        |      |                        |      |                        |                       |                       |                      |
| Buprenorphine sublingual 0.87mg       | 120  | -0.35 (-1.39 to 0.69)  | 48.7 | -                      | 2.88 (1.19 to 6.88)   | 7.91 (3.05 to 21.14)  | -                    |
| Buprenorphine transdermal 0.28-0.36mg | 828  | -0.36 (-0.73 to 0.01)  | 47.9 | -                      | 2.07 (1.19 to 3.61)   | 3.06 (1.96 to 4.75)   | 2.51 (0.44 to 15.49) |
| Codeine 105-127mg                     | 263  | -0.19 (-0.62 to 0.24)  | 19.9 | -                      | 1.51 (0.81 to 2.85)   | 2.14 (1.28 to 3.58)   | 0.64 (0.02 to 12.54) |
| Dextropropoxyphene 300mg              | 129  | -                      | -    | -                      | 1.02 (0.43 to 2.34)   | 1.06 (0.55 to 2.04)   | -                    |
| Fentanyl transdermal 0.6mg            | 216  | -0.31 (-0.69 to 0.07)  | 37.6 | -                      | 2.76 (1.22 to 6.32)   | 5.43 (2.92 to 10.26)  | 3.14 (0.37 to 34.09) |
| Hydromorphone 8mg                     | 319  | -0.01 (-0.53 to 0.50)  | 8.7  | -0.11 (-0.59 to 0.37)  | 4.93 (2.68 to 9.27)   | 2.63 (1.66 to 4.21)   | 1.15 (0.32 to 3.96)  |
| Hydromorphone 13.9-16mg               | 469  | -0.16 (-0.51 to 0.18)  | 12.0 | -0.11 (-0.49 to 0.27)  | 8.72 (5.10 to 15.09)  | 4.79 (3.25 to 7.16)   | 1.46 (0.55 to 3.76)  |



Comparative effectiveness of non-steroidal anti-inflammatory drugs and opioid therapy

|                                 |      |                        |      |                        |                       |                       |                       |
|---------------------------------|------|------------------------|------|------------------------|-----------------------|-----------------------|-----------------------|
| Hydromorphone 34mg              | 100  | -0.00 (-0.61 to 0.60)  | 11.6 | -                      | -                     | 2.41 (1.24 to 4.76)   | 7.64 (0.84 to 257.23) |
| Morphine with naltrexone 43.5mg | 171  | -0.25 (-0.82 to 0.32)  | 34.1 | -0.21 (-0.75 to 0.33)  | 1.46 (0.62 to 3.52)   | 1.21 (0.71 to 2.05)   | 2.12 (0.44 to 12.90)  |
| Oxycodone ≤40mg                 | 705  | -0.09 (-0.41 to 0.22)  | 4.5  | -0.15 (-0.70 to 0.41)  | 7.29 (4.83 to 11.17)  | 4.96 (3.78 to 6.52)   | 1.54 (0.40 to 6.26)   |
| Oxycodone ≥48mg                 | 883  | -0.17 (-0.33 to -0.01) | 0.9  | -0.24 (-0.61 to 0.13)  | 6.78 (4.70 to 9.66)   | 4.65 (3.33 to 6.55)   | 2.40 (1.09 to 5.60)   |
| Oxymorphone 40mg                | 121  | -0.23 (-0.77 to 0.30)  | 31.1 | -0.27 (-0.83 to 0.28)  | 13.26 (6.53 to 27.94) | 10.64 (4.80 to 26.36) | -                     |
| Oxymorphone 80mg                | 121  | -0.32 (-0.86 to 0.22)  | 42.3 | -0.32 (-0.87 to 0.23)  | 19.34 (9.47 to 40.29) | 7.42 (3.57 to 16.41)  | -                     |
| Tapentadol <316mg               | 1422 | -0.34 (-0.50 to -0.17) | 33.9 | -0.33 (-0.62 to -0.04) | 2.58 (1.84 to 3.67)   | 1.94 (1.55 to 2.42)   | 0.55 (0.19 to 1.51)   |
| Tramadol 100-131mg              | 930  | -0.12 (-0.25 to 0.01)  | 0.0  | -0.07 (-0.22 to 0.08)  | 1.77 (1.25 to 2.51)   | 1.62 (1.26 to 2.09)   | 1.45 (0.39 to 4.57)   |
| Tramadol 200mg                  | 858  | -0.13 (-0.26 to 0.00)  | 0.0  | -0.17 (-0.32 to -0.03) | 2.86 (2.10 to 3.89)   | 2.76 (2.16 to 3.53)   | 1.12 (0.38 to 3.13)   |
| Tramadol 275-300mg              | 1319 | -0.31 (-0.43 to -0.20) | 18.1 | -0.28 (-0.43 to -0.14) | 4.73 (3.52 to 6.39)   | 2.88 (2.26 to 3.69)   | 2.23 (0.87 to 5.92)   |
| Tramadol 400mg*                 | 205  | -0.23 (-0.46 to -0.01) | 11.8 | -0.24 (-0.46 to -0.01) | 4.71 (2.75 to 8.02)   | 4.41 (2.68 to 7.34)   | 2.96 (0.74 to 11.42)  |
| Tramadol/paracetamol 110-155mg  | 350  | -0.39 (-0.88 to 0.09)  | 53.0 | -0.21 (-0.67 to 0.24)  | 3.17 (1.55 to 6.84)   | 2.67 (1.46 to 4.99)   | -                     |
| <b>Placebos</b>                 |      |                        |      |                        |                       |                       |                       |
| Topical placebo                 | 4503 | -0.23 (-0.39 to -0.06) | 4.6  | -0.21 (-0.38 to -0.05) | 0.84 (0.55 to 1.27)   | 1.11 (0.85 to 1.44)   | 0.91 (0.28 to 2.90)   |
| Oral and topical placebo        | 127  | 0.07 (-0.22 to 0.35)   | 0.2  | -0.04 (-0.33 to 0.24)  | 1.20 (0.56 to 2.52)   | 0.96 (0.56 to 1.62)   | 1.95 (0.05 to 74.00)  |

All treatment effect estimates are comparisons to oral placebo. Number of participants randomized to oral placebo: 18,712

ES: effect size; Pr: probability; MID: between-group minimum clinically important difference; OR: odds ratio; 95% CrI: 95% credible interval.

Light green ES: lower bound of 95% CrI <0; dark green ES: lower bound of 95% CrI ≤-0.37 (MID); light green MID: probability of reaching MID ≥95%; dark green MID: probability to reach MID ≥99%; light red OR: lower bound of 95% CrI >1; dark red OR: lower bound of 95% CrI ≥2.

All doses are in mg per day. \*Maximum daily recommended dose. ¶ Withdrawn from the market. \*\*The lower bounds of the 95% CrI of dropouts due to adverse events for paracetamol 3900-4000mg and of any adverse event for rofecoxib 12.5mg are >1, but are shown as 1.00 due to rounding.

Pain: 84 out of 93 interventions/controls included, 170 out of 192 trials with available data; physical function: 67 out of 93 interventions/controls included, 125 out of 192 trials with available data; dropouts due to adverse events: 86 out of 93 interventions/controls included, 168 out of 192 trials with data available; any adverse event: 81 out of 93 interventions/controls included, 141 out of 192 trials with data available; and serious adverse events: 52 out of 93 interventions/controls, 95 out of 192 trials with data available.

## Web-appendix 8. Number of arms and randomized participants

| <b>Intervention</b>          | <b>No. of arms</b> | <b>No. of participants randomized</b> |
|------------------------------|--------------------|---------------------------------------|
| <b>Paracetamol</b>           |                    |                                       |
| Paracetamol <2000mg          | 1                  | 158                                   |
| Paracetamol 3000mg           | 3                  | 442                                   |
| Paracetamol 3900-4000mg      | 11                 | 2614                                  |
| <b>NSAIDs</b>                |                    |                                       |
| Aceclofenac 200mg            | 7                  | 1179                                  |
| Celecoxib 100mg              | 2                  | 419                                   |
| Celecoxib 200mg              | 44                 | 11362                                 |
| Celecoxib 400mg              | 4                  | 661                                   |
| Diclofenac ≤75mg             | 4                  | 519                                   |
| Diclofenac 100-105mg         | 12                 | 2113                                  |
| Diclofenac 114-133mg         | 3                  | 812                                   |
| Diclofenac 150mg             | 17                 | 3709                                  |
| Diclofenac topical 70-81mg   | 6                  | 987                                   |
| Diclofenac topical 140-160mg | 8                  | 3124                                  |
| Diflunisal 750mg             | 1                  | 0                                     |
| Diflunisal 1000mg            | 1                  | 140                                   |
| Etodolac 600mg               | 4                  | 454                                   |
| Etoricoxib 5-10mg            | 1                  | 231                                   |
| Etoricoxib 30mg              | 6                  | 1135                                  |
| Etoricoxib 60mg              | 4                  | 939                                   |
| Etoricoxib 90mg              | 2                  | 307                                   |
| S-flurbiprofen plaster ≤20mg | 1                  | 248                                   |
| S-flurbiprofen plaster 40mg  | 1                  | 134                                   |
| Ibuprofen 400mg              | 1                  | 82                                    |
| Ibuprofen 1200mg             | 6                  | 1055                                  |
| Ibuprofen 2400mg             | 6                  | 1208                                  |
| Ibuprofen topical 1500mg     | 1                  | 138                                   |
| Indomethacin 75mg            | 2                  | 356                                   |
| Indomethacin 105mg           | 1                  | 113                                   |
| Indomethacin 150mg           | 1                  | 123                                   |

Comparative effectiveness of non-steroidal anti-inflammatory drugs and opioid therapy

|                              |    |      |
|------------------------------|----|------|
| Indomethacin 210mg           | 1  | 110  |
| Isoxicam 200mg               | 3  | 391  |
| Isoxicam 300mg               | 1  | 112  |
| Ketoprofen 200mg             | 1  | 118  |
| Ketoprofen topical 50mg      | 1  | 223  |
| Ketoprofen topical 100mg     | 2  | 456  |
| Ketoprofen topical 200-220mg | 4  | 863  |
| Lornoxicam 16mg              | 1  | 137  |
| Lumiracoxib 100mg            | 4  | 2165 |
| Lumiracoxib 200mg            | 4  | 1409 |
| Lumiracoxib 400mg            | 5  | 1404 |
| Meclofenamate sodium 300mg   | 1  | 211  |
| Meloxicam ≤10mg              | 4  | 886  |
| Meloxicam 15mg               | 7  | 1184 |
| Nabumetone 1000mg            | 4  | 1034 |
| Nabumetone 1327mg            | 1  | 191  |
| Nabumetone 1500-1831mg       | 7  | 1399 |
| Naproxcinod 250mg            | 1  | 111  |
| Naproxcinod 750mg            | 4  | 708  |
| Naproxcinod 1500mg           | 6  | 1468 |
| Naproxcinod 2250mg           | 1  | 124  |
| Naproxen ≤750mg              | 8  | 2370 |
| Naproxen 1000mg              | 27 | 5869 |
| Nimesulide 200mg             | 3  | 418  |
| Nimesulide 800mg             | 1  | 146  |
| Oxaprozin 1200mg             | 3  | 393  |
| Oxaprozin 1800mg             | 1  | 81   |
| Piroxicam 20mg               | 10 | 2183 |
| Piroxicam 25.5mg             | 1  | 147  |
| Piroxicam topical 15mg       | 1  | 117  |
| Piroxicam topical 20mg       | 1  | 124  |
| Polmacoxib 2mg               | 1  | 146  |
| Rofecoxib 5mg                | 1  | 149  |
| Rofecoxib 12.5mg             | 13 | 3554 |
| Rofecoxib 25mg               | 14 | 3330 |
| Rofecoxib 50mg               | 1  | 97   |
| Tiaprofenic acid 600mg       | 1  | 307  |

Comparative effectiveness of non-steroidal anti-inflammatory drugs and opioid therapy

|                                       |     |       |
|---------------------------------------|-----|-------|
| Tolfenamic acid 600mg                 | 1   | 116   |
| Valdecoxib 5mg                        | 2   | 321   |
| Valdecoxib 10mg                       | 2   | 317   |
| Valdecoxib 20mg                       | 1   | 202   |
| Zaltoprofen 240mg                     | 1   | 105   |
| <b>Opioids</b>                        |     |       |
| Buprenorphine sublingual 0.87mg       | 1   | 120   |
| Buprenorphine transdermal 0.28-0.36mg | 5   | 828   |
| Codeine 105-127mg                     | 2   | 263   |
| Dextropropoxyphene 300mg              | 1   | 129   |
| Fentanyl transdermal 0.6mg            | 1   | 216   |
| Hydromorphone 8mg                     | 1   | 319   |
| Hydromorphone 13.9-16mg               | 2   | 469   |
| Hydromorphone 34mg                    | 1   | 100   |
| Morphine with naltrexone 43.5mg       | 1   | 171   |
| Oxycodone ≤40mg                       | 5   | 705   |
| Oxycodone ≥48mg                       | 3   | 883   |
| Oxymorphone 40mg                      | 1   | 121   |
| Oxymorphone 80mg                      | 1   | 121   |
| Tapentadol <316mg                     | 5   | 1422  |
| Tramadol 100-131mg                    | 5   | 930   |
| Tramadol 200mg                        | 6   | 858   |
| Tramadol 275-300mg                    | 7   | 1319  |
| Tramadol 400mg                        | 1   | 205   |
| Tramadol with paracetamol 154-225mg   | 2   | 350   |
| <b>Placebos</b>                       |     |       |
| Placebo oral                          | 109 | 18712 |
| Placebo topical                       | 22  | 4503  |
| Placebo oral and topical              | 1   | 127   |

### Web-appendix 9. Network plot

Network of comparisons included in the analysis of osteoarthritis pain.

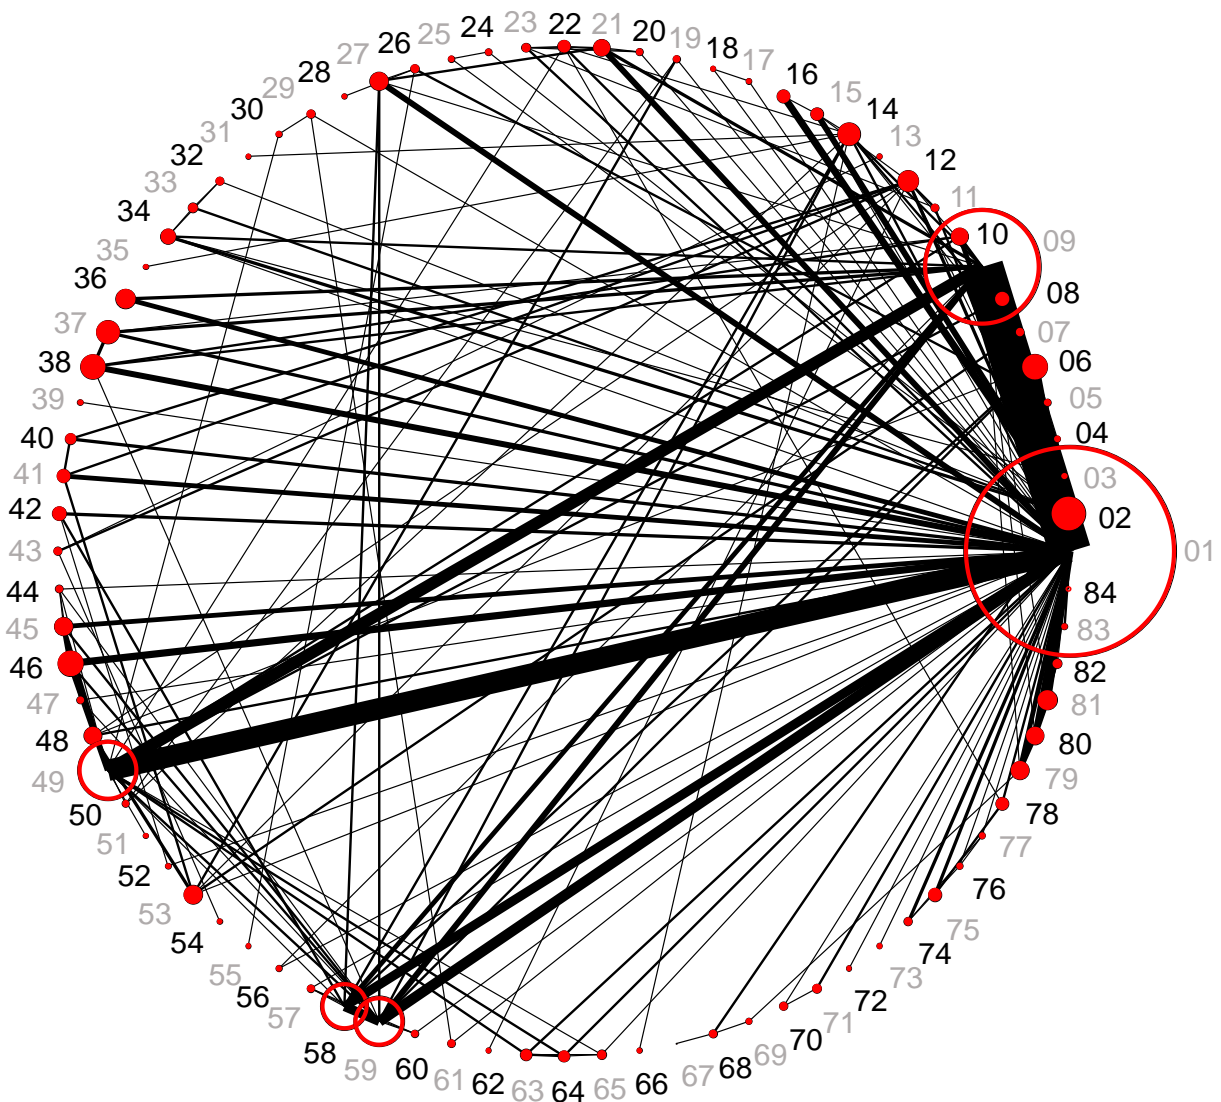

The size of every circle is proportional to the number of randomly assigned patients and indicates the sample size. The width of the lines corresponds to the number of trials. Larger nodes were made hollow to allow the visualization of adjacent nodes. 01=placebo oral. 02=placebo topical. 03=placebo oral and topical. 04=paracetamol <2000 mg. 05=paracetamol 3000 mg. 06=paracetamol 3990-4000 mg. 07=aceclofenac 200 mg. 08=celecoxib 100 mg. 09=celecoxib 200 mg. 10=celecoxib 400 mg. 11=diclofenac  $\leq 75$  mg. 12=diclofenac 100-105 mg. 13=diclofenac 114-133 mg. 14=diclofenac 150 mg. 15=diclofenac topical 70-81 mg. 16=diclofenac topical 140-160 mg. 17=diflunisal 750 mg. 18=diflunisal 1000 mg. 19=etodolac 600 mg. 20=etoricoxib 5-10 mg. 21=etoricoxib 30 mg. 22=etoricoxib 60 mg. 23=etoricoxib 90 mg. 24=S-flurbiprofen plaster  $\leq 20$  mg. 25=S-flurbiprofen plaster 40 mg. 26=ibuprofen 1200 mg. 27=ibuprofen 2400 mg. 28=ibuprofen topical 1500 mg. 29=indomethacin 75 mg.

## Comparative effectiveness of non-steroidal anti-inflammatory drugs and opioid therapy

30=isoxicam 200 mg. 31=ketoprofen 200 mg. 32=ketoprofen topical 50 mg. 33=ketoprofen topical 100 mg. 34=ketoprofen topical 200-220 mg. 35=lornoxicam 16 mg. 36=lumarixocib 100 mg. 37=lumaricoxib 200 mg. 38=lumaricoxib 400 mg. 39=meclofenamate sodium 300 mg. 40=meloxicam  $\leq 10$  mg. 41=meloxicam 15 mg. 42=nabumetone 1000 mg. 43=nabumetone 1500-1831 mg. 44=naproxcinod 250 mg. 45=naproxcinod 750 mg. 46= naproxcinod 1500 mg. 47= naproxcinod 2250 mg. 48=naproxen  $\leq 750$  mg. 49=naproxen 1000 mg. 50=nimesulide 200 mg. 51=nimesulide 800 mg. 52=oxaprozin 1200 mg. 53=piroxicam 20 mg. 54=piroxicam 25.5 mg. 55=piroxicam topical 15 mg. 56=polmacoxib 2 mg. 57=rofecoxib 5 mg. 58=rofecoxib 12.5 mg. 59=rofecoxib 25 mg. 60=rofecoxib 50 mg. 61=tiaprofenic acid 600 mg. 62=tolfenamic acid 600 mg. 63=valdecoxib 5 mg. 64=valdecoxib 10 mg. 65=valdecoxib 20 mg. 66=zaltoprofen 240 mg. 67=buprenorphine sublingual 0.87 mg. 68=buprenorphine transdermal 0.28-0.36 mg. 69=codeine 105-127 mg. 70=hydromorphone 8 mg. 71=hydromorphone 13.9-16 mg. 72=hydromorphone 34 mg. 73=morphine with naltrexone 43.5 mg. 74=oxycodone  $\leq 40$  mg. 75=oxycodone  $\geq 48$  mg. 76=oxymorphone 40 mg. 77=oxymorphone 80 mg. 78=tapentadol  $< 316$  mg. 79=tramadol 100-131 mg. 80=tramadol 200 mg. 81=tramadol 275-300 mg. 82=tramadol 400 mg. 83=tramadol/paracetamol 154-225 mg. 84=fentanyl transdermal 0.6 mg

**Web-appendix 10. Number of trials reporting efficacy estimates by drug category and timepoint**

| Timepoint | Drug Type |         |             |                   |                       | Total |
|-----------|-----------|---------|-------------|-------------------|-----------------------|-------|
|           | NSAIDs    | Opioids | Paracetamol | NSAIDs vs opioids | NSAIDs vs Paracetamol |       |
| Baseline  | 147       | 29      | 5           | 2                 | 9                     | 192   |
|           | 31.89     | 29.29   | 38.46       | 20.00             | 37.50                 | 31.63 |
| 1 week    | 27        | 15      | 1           | 1                 | 4                     | 48    |
|           | 5.86      | 15.15   | 7.69        | 10.00             | 16.67                 | 7.91  |
| 2 weeks   | 71        | 13      | 1           | 2                 | 3                     | 90    |
|           | 15.40     | 13.13   | 7.69        | 20.00             | 12.50                 | 14.83 |
| 4 weeks   | 72        | 17      | 1           | 2                 | 2                     | 94    |
|           | 15.62     | 17.17   | 7.69        | 20.00             | 8.33                  | 15.49 |
| 6 weeks   | 54        | 8       | 1           | 1                 | 5                     | 69    |
|           | 11.71     | 8.08    | 7.69        | 10.00             | 20.83                 | 11.37 |
| 12 weeks  | 64        | 17      | 3           | 2                 | 1                     | 87    |
|           | 13.88     | 17.17   | 23.08       | 20.00             | 4.17                  | 14.33 |
| 24 weeks  | 18        | 0       | 1           | 0                 | 0                     | 19    |
|           | 3.90      | 0.00    | 7.69        | 0.00              | 0.00                  | 3.13  |
| 48 weeks  | 7         | 0       | 0           | 0                 | 0                     | 7     |
|           | 1.52      | 0.00    | 0.00        | 0.00              | 0.00                  | 1.15  |
| >52 weeks | 1         | 0       | 0           | 0                 | 0                     | 1     |
|           | <1        | 0.00    | 0.00        | 0.00              | 0.00                  | <1    |

First row has frequencies, and second row has column percentages.

NSAIDs refer to trials that investigated the efficacy of non-steroidal anti-inflammatory drugs only.

Opioids denote trials that investigated the efficacy of opioid drugs only.

Comparative effectiveness of non-steroidal anti-inflammatory drugs and opioid therapy

Web-appendix 11. Trial characteristics

| Author (year)   | Interventions                                                                                             | Number of participants | % of Women | Age | Joints       | LOCF    | Risk of Bias           |                     |                       |                              |                         |
|-----------------|-----------------------------------------------------------------------------------------------------------|------------------------|------------|-----|--------------|---------|------------------------|---------------------|-----------------------|------------------------------|-------------------------|
|                 |                                                                                                           |                        |            |     |              |         | Allocation concealment | Blinding of Patient | Blinding of Therapist | Blinding of Outcome Assessor | Incomplete outcome data |
| Afilalo (2010)  | Placebo oral<br>Oxycodone (48.2 mg/day)<br>Tapentadol (299.3 mg/day)                                      | 1030                   | 60         | 58  | Knee         | Yes     | Low                    | Low                 | Low                   | Low                          | High                    |
| Agrawal (1999)  | Placebo oral<br>Diclofenac (150 mg/day)/misoprostol<br>Nabumetone (1500 mg/day)<br>Naproxen (1000 mg/day) | 1398                   | 58         | 62  | Knee and hip | Unclear | Unclear                | Low                 | Low                   | Low                          | Unclear                 |
| Alho (1988)     | Naproxen (750 mg/day)<br>Piroxicam (20 mg/day)                                                            | 252                    | 72         | 70  | Hip          | Unclear | Unclear                | Low                 | Low                   | Low                          | Low                     |
| Altman (1998)   | Placebo oral<br>Naproxen (1000 mg/day)                                                                    | 495                    | 38         | 63  | Knee         | Yes     | Unclear                | High                | Unclear               | High                         | High                    |
| Altman (2007)   | Placebo oral<br>Paracetamol (1950 mg/day)<br>Paracetamol (3900 mg/day)                                    | 483                    | 67         | 62  | Knee and hip | Unclear | Unclear                | Low                 | Low                   | Low                          | Low                     |
| Altman (2015)   | Placebo oral<br>Meloxicam (5 mg/day)<br>Meloxicam (10 mg/day)                                             | 403                    | 66         | 61  | Knee and hip | Unclear | Unclear                | Low                 | Unclear               | Low                          | High                    |
| Ardia (1994)    | Diclofenac (100 mg/day)<br>Tolfenamic acid (600 mg/day)                                                   | 228                    | 67         | 60  | Knee and hip | No      | Unclear                | Low                 | Low                   | Low                          | High                    |
| Asmus (2014)    | Placebo oral<br>Celecoxib (200 mg/day)                                                                    | 380                    | 61         | 60  | Knee         | Yes     | Unclear                | Low                 | Low                   | Low                          | High                    |
| Asmus (2014)    | Placebo oral<br>Celecoxib (200 mg/day)                                                                    | 388                    | 68         | 59  | Knee         | Yes     | Unclear                | Low                 | Low                   | Low                          | High                    |
| Babul (2004)    | Placebo oral<br>Tramadol (276 mg/day)                                                                     | 246                    | 62         | 61  | Knee         | Unclear | Unclear                | Low                 | Low                   | Low                          | Low                     |
| Baer (2005)     | Placebo topical<br>Diclofenac_Topical (77.04 mg/day)                                                      | 216                    | 56         | 65  | Knee         | Yes     | Low                    | Low                 | Low                   | Low                          | High                    |
| Baerwald (2010) | Placebo oral<br>Naproxinod (1500 mg/day)<br>Naproxen (1000 mg/day)                                        | 810                    | 66         | 63  | Hip          | Yes     | Unclear                | Low                 | Unclear               | Low                          | Low                     |
| Bakshi (1991)   | Placebo oral<br>Diclofenac (150 mg/day)                                                                   | 314                    | 59         | 69  | Knee and hip | Unclear | Unclear                | Low                 | Low                   | Low                          | High                    |
| Bakshi (1996)   | Diclofenac (100 mg/day)                                                                                   | 216                    | 63         | 64  | Knee         | Yes     | Unclear                | Low                 | Low                   | Low                          | High                    |



Comparative effectiveness of non-steroidal anti-inflammatory drugs and opioid therapy

| Author (Year)          | Intervention                                                                                                                | N    | Events | Events | Events | Site         | Quality | Confidence | Confidence | Confidence | Confidence | Confidence |
|------------------------|-----------------------------------------------------------------------------------------------------------------------------|------|--------|--------|--------|--------------|---------|------------|------------|------------|------------|------------|
| Banerjee (2016)        | Diclofenac (75 mg/day)<br>Etoricoxib (60 mg/day)<br>Tapentadol (200 mg/day)                                                 | 244  | 43     | 54     | 54     | Knee and hip | Yes     | Unclear    | High       | High       | High       | High       |
| Baraf (2010)           | Placebo topical<br>Diclofenac topical (160 mg/day)                                                                          | 420  | 64     | 61     | 61     | Knee         | Yes     | Low        | Low        | Low        | Low        | High       |
| Barthel (2010)         | Placebo topical<br>Diclofenac topical (160 mg/day)                                                                          | 492  | 66     | 59     | 59     | Knee         | Yes     | Unclear    | Low        | Low        | Low        | High       |
| Becvar (1999)          | Diclofenac (100 mg/day)<br>Nabumetone (1500 mg/day)                                                                         | 394  | 77     | 61     | 61     | Knee and hip | Unclear | Unclear    | High       | High       | High       | High       |
| Behrens (1985)         | Diclofenac (75 mg/day)<br>Isoxicam (300 mg/day)                                                                             | 240  | 61     | 63     | 63     | Knee and hip | Unclear | Unclear    | Low        | Low        | Low        | High       |
| Bellamy (1995)         | Diclofenac (125 mg/day)<br>Nabumetone (1327 mg/day)                                                                         | 382  | 70     | 62     | 62     | Knee and hip | Unclear | Unclear    | Low        | Low        | Low        | Unclear    |
| Benevolenskaya (2003)  | Placebo oral<br>Lumiracoxib (100 mg/day)                                                                                    | 244  | NR     | NR     | NR     | Knee and hip | Unclear | Unclear    | Unclear    | Unclear    | Unclear    | Low        |
| Bensen (1999)          | Placebo oral<br>Celecoxib (100 mg/day)<br>Celecoxib (200 mg/day)<br>Celecoxib (400 mg/day)<br>Naproxen (1000 mg/day)        | 1004 | 72     | 62     | 62     | Knee         | Yes     | Unclear    | Low        | Low        | Low        | High       |
| Bierma-Zeinstra (2017) | Ibuprofen (1200 mg/day)<br>Ibuprofen (2400 mg/day)                                                                          | 464  | 41     | 52     | 52     | Knee         | No      | Low        | Low        | Low        | Low        | High       |
| Bihlet (2020)          | Placebo topical<br>Diclofenac topical (70.4 mg/day)<br>Diclofenac topical (140.8 mg/day)<br>Diclofenac topical (160 mg/day) | 444  | 67     | 64     | 64     | Knee         | Unclear | Low        | Low        | Low        | Low        | High       |
| Bin (2007)             | Celecoxib (200 mg/day)<br>Lumiracoxib (200 mg/day)                                                                          | 703  | 85     | 61     | 61     | Knee         | Yes     | Unclear    | Low        | Low        | Low        | Low        |
| Bingham (2007)         | Placebo oral<br>Celecoxib (200 mg/day)<br>Etoricoxib (30 mg/day)                                                            | 599  | 67     | 62     | 62     | Knee and hip | Yes     | Unclear    | Low        | Low        | Low        | High       |
| Bingham (2007)         | Placebo oral<br>Celecoxib (200 mg/day)<br>Etoricoxib (30 mg/day)                                                            | 608  | 66     | 62     | 62     | Knee and hip | Yes     | Unclear    | Low        | Low        | Low        | High       |
| Birbara (2006)         | Placebo oral<br>Celecoxib (200 mg/day)<br>Rofecoxib (12.5 mg/day)                                                           | 395  | 72     | 60     | 60     | Knee         | Yes     | Unclear    | Low        | Low        | Low        | High       |
| Birbara (2006)         | Placebo oral<br>Celecoxib (200 mg/day)                                                                                      | 413  | 65     | 61     | 61     | Knee         | Yes     | Unclear    | Low        | Low        | Low        | High       |

Comparative effectiveness of non-steroidal anti-inflammatory drugs and opioid therapy

|                      |                                                                                              |      |    |    |              |         |         |      |         |      |      |
|----------------------|----------------------------------------------------------------------------------------------|------|----|----|--------------|---------|---------|------|---------|------|------|
| Bocanegra (1998)     | Rofecoxib (12.5 mg/day)<br>Placebo oral                                                      | 572  | 69 | 62 | Knee and hip | Unclear | Unclear | Low  | Low     | Low  | Low  |
| Bolnot-Delmas (1996) | Diclofenac (150 mg/day)<br>Diclofenac (150 mg/day)/misoprostol                               | 522  | 70 | 60 | Knee and hip | Unclear | Unclear | Low  | Unclear | Low  | Low  |
| Boswell (2008)       | Placebo oral                                                                                 | 649  | 65 | 63 | Knee         | Yes     | Unclear | Low  | Low     | Low  | High |
| Boswell (2008)       | Celecoxib (200 mg/day)                                                                       | 1331 | 68 | 60 | Knee         | Yes     | Unclear | Low  | Low     | Low  | High |
| Boureau (2004)       | Paracetamol (3000 mg/day)<br>Ibuprofen (1200 mg/day)                                         | 222  | 73 | 66 | Knee and hip | Unclear | Unclear | Low  | Low     | Low  | High |
| Burch (2007)         | Placebo oral<br>Tramadol (275 mg/day)                                                        | 646  | 63 | 62 | Knee         | Unclear | Low     | Low  | Low     | Low  | High |
| Busquier (1997)      | Aceclofenac (200 mg/day)<br>Piroxicam (20 mg/day)                                            | 240  | 91 | 59 | Knee         | Unclear | Unclear | Low  | Low     | Low  | High |
| Cannon (2000)        | Diclofenac (150 mg/day)<br>Rofecoxib (12.5 mg/day)<br>Rofecoxib (25 mg/day)                  | 784  | 67 | 64 | Knee and hip | Unclear | Unclear | Low  | Low     | Low  | Low  |
| Cardoe (1986)        | Naproxen (1000 mg/day)<br>Isoxicam (200 mg/day)                                              | 230  | 68 | 63 | Knee and hip | Unclear | Unclear | Low  | Low     | Low  | High |
| Caruso (1987)        | Placebo oral<br>Naproxen (750 mg/day)                                                        | 734  | 74 | 59 | Knee and hip | No      | Unclear | Low  | Low     | Low  | High |
| Clegg (2006)         | Placebo oral<br>Celecoxib (200 mg/day)                                                       | 1583 | 64 | 59 | Knee         | Yes     | Unclear | Low  | Low     | Low  | Low  |
| Conaghan (2011)      | Codeine (127.2 mg/day)<br>Buprenorphine transdermal (.30 mg/day)                             | 220  | 66 | 71 | Knee and hip | Yes     | Unclear | High | High    | High | High |
| Conaghan (2013)      | Placebo oral<br>Placebo topical<br>Celecoxib (200 mg/day)<br>Ketoprofen topical (200 mg/day) | 928  | 67 | 61 | Knee         | Yes     | Unclear | High | High    | High | High |
| Conaghan (2013)      | Placebo topical<br>Ketoprofen topical (100 mg/day)                                           | 471  | 64 | 61 | Knee         | Yes     | Unclear | High | High    | High | Low  |
| Dahlberg (2009)      | Diclofenac (100 mg/day)<br>Celecoxib (200 mg/day)                                            | 925  | 69 | 71 | Knee and hip | Yes     | Low     | Low  | Low     | Low  | High |
| Day (2000)           | Placebo oral<br>Ibuprofen (2400 mg/day)<br>Rofecoxib (12.5 mg/day)<br>Rofecoxib (25 mg/day)  | 809  | 80 | 64 | Knee and hip | No      | Unclear | Low  | Low     | Low  | Low  |
| DeLemos (2011)       | Placebo oral                                                                                 | 1011 | 63 | 60 | Knee         | Yes     | Unclear | Low  | Low     | Low  | High |

Comparative effectiveness of non-steroidal anti-inflammatory drugs and opioid therapy

|                   | Celecoxib (200 mg/day)<br>Tramadol (100 mg/day)<br>Tramadol (200 mg/day)<br>Tramadol (300 mg/day)                 |     |    |    | and hip      |         |         |     |         |     |         |  |
|-------------------|-------------------------------------------------------------------------------------------------------------------|-----|----|----|--------------|---------|---------|-----|---------|-----|---------|--|
| Dickson (1991)    | Ibuprofen (1200 mg/day)<br>Piroxicam topical (15 mg/day)                                                          | 235 | 66 | 62 | Knee         | Unclear | Unclear | Low | Low     | Low | High    |  |
| Doherty (1992)    | Diclofenac (117 mg/day)<br>Diclofenac (116 mg/day)/misoprostol                                                    | 455 | 63 | 62 | Knee and hip | Unclear | Unclear | Low | Low     | Low | High    |  |
| Doherty (2011)    | Paracetamol (3000 mg/day)<br>Ibuprofen (1200 mg/day)                                                              | 892 | 49 | 61 | Knee         | Yes     | Unclear | Low | Low     | Low | High    |  |
| Eberl (1982)      | Indomethacin (150 mg/day)<br>Isoxicam (200 mg/day)                                                                | 246 | 63 | 63 | Knee and hip | Unclear | Unclear | Low | Low     | Low | Unclear |  |
| Ehrich (2001)     | Placebo oral<br>Rofecoxib (5 mg/day)<br>Rofecoxib (12.5 mg/day)<br>Rofecoxib (25 mg/day)<br>Rofecoxib (50 mg/day) | 672 | 71 | 62 | Knee and hip | Yes     | Unclear | Low | Low     | Low | High    |  |
| Ekman (2014)      | Placebo oral<br>Naproxen (1000 mg/day)                                                                            | 849 | 63 | 61 | Knee and hip | Yes     | Unclear | Low | Low     | Low | High    |  |
| Ekman (2014)      | Placebo oral<br>Naproxen (1000 mg/day)                                                                            | 832 | 60 | 61 | Knee         | Yes     | Unclear | Low | Low     | Low | High    |  |
| Emery (2008)      | Celecoxib (200 mg/day)<br>Diclofenac (150 mg/day)                                                                 | 249 | 22 | 64 | Hip          | Yes     | Unclear | Low | Low     | Low | High    |  |
| Emkey (2004)      | Placebo oral<br>Tramadol (154mg/day) with Paracetamol                                                             | 307 | 68 | 61 | Knee and hip | Yes     | Unclear | Low | Low     | Low | High    |  |
| Essex (2012)      | Celecoxib (200 mg/day)<br>Naproxen (1000 mg/day)                                                                  | 589 | 66 | 60 | Knee         | Unclear | Unclear | Low | Unclear | Low | High    |  |
| Essex (2012)      | Placebo oral<br>Celecoxib (200 mg/day)<br>Naproxen (1000 mg/day)                                                  | 322 | 80 | 58 | Knee         | Unclear | Unclear | Low | Unclear | Low | High    |  |
| Essex (2014)      | Placebo oral<br>Celecoxib (200 mg/day)<br>Naproxen (1000 mg/day)                                                  | 318 | 66 | 60 | Knee         | Unclear | Unclear | Low | Low     | Low | High    |  |
| Essex (2016)      | Placebo oral<br>Celecoxib (200 mg/day)<br>Naproxen (1000 mg/day)                                                  | 367 | 67 | 65 | Knee         | Unclear | Unclear | Low | Unclear | Low | High    |  |
| Etropolski (2011) | Placebo oral<br>Oxycodone (31 mg/day)<br>Tapentadol (192 mg/day)<br>Tapentadol (278 mg/day)                       | 596 | 58 | 58 | Knee and hip | Yes     | Unclear | Low | Low     | Low | High    |  |

Comparative effectiveness of non-steroidal anti-inflammatory drugs and opioid therapy

|                     |                                                                                                                     |      |    |    |                 |         |         |     |         |     |         |
|---------------------|---------------------------------------------------------------------------------------------------------------------|------|----|----|-----------------|---------|---------|-----|---------|-----|---------|
| Fioravanti (2002)   | Naproxen (1000 mg/day)<br>Nimesulide (800 mg/day)                                                                   | 287  | 75 | 66 | Knee<br>and hip | Unclear | Low     | Low | Low     | Low | High    |
| Fishman (2007)      | Placebo oral<br>Tramadol (100 mg/day)<br>Tramadol (200 mg/day)<br>Tramadol (300 mg/day)                             | 552  | 60 | 61 | Knee            | Yes     | Low     | Low | Low     | Low | High    |
| Fleischmann (2005)  | Placebo oral<br>Celecoxib (200 mg/day)<br>Lumiracoxib (200 mg/day)<br>Lumiracoxib (400 mg/day)                      | 1608 | 66 | 61 | Knee            | Yes     | Unclear | Low | Low     | Low | High    |
| Fraenkel (2020)     | Placebo oral<br>Meloxicam (15 mg/day)                                                                               | 364  | 13 | 58 | Knee            | Yes     | Unclear | Low | Low     | Low | High    |
| Friedmann (2011)    | Placebo oral<br>Oxycodone (55 mg/day)                                                                               | 412  | 70 | 58 | Knee<br>and hip | Yes     | Unclear | Low | Unclear | Low | High    |
| Gana (2006)         | Placebo oral<br>Tramadol (100 mg/day)<br>Tramadol (200 mg/day)<br>Tramadol (300 mg/day)<br>Tramadol (400 mg/day)    | 1020 | 62 | 58 | Knee<br>and hip | Yes     | Low     | Low | Low     | Low | High    |
| Ghosh (2007)        | Placebo oral<br>Diclofenac (75 mg/day)<br>Etoricoxib (90 mg/day)                                                    | 585  | 63 | 55 | Knee            | Unclear | Unclear | Low | Low     | Low | High    |
| Gibofsky (2003)     | Placebo oral<br>Celecoxib (200 mg/day)<br>Rofecoxib (25 mg/day)                                                     | 477  | 67 | 63 | Knee            | Yes     | Unclear | Low | Low     | Low | High    |
| Gibofsky (2014)     | Placebo oral<br>Diclofenac (70 mg/day)<br>Diclofenac (105 mg/day)                                                   | 305  | 67 | 62 | Knee<br>and hip | Yes     | Unclear | Low | Low     | Low | Low     |
| Golden (2004)       | Placebo oral<br>Paracetamol (4000 mg/day)<br>Naproxen (550 mg/day)                                                  | 465  | 69 | 61 | Knee            | Unclear | Unclear | Low | Low     | Low | High    |
| Gordo (2017)        | Placebo oral<br>Celecoxib (200 mg/day)<br>Ibuprofen (2400 mg/day)                                                   | 388  | 73 | 63 | Knee            | Unclear | Unclear | Low | Low     | Low | High    |
| Goregaonkar (2009)  | Diclofenac (150 mg/day)<br>Lornoxicam (16 mg/day)                                                                   | 273  | 42 | 48 | Knee<br>and hip | No      | Low     | Low | Low     | Low | High    |
| Gottesdiener (2002) | Placebo oral<br>Etoricoxib (5 mg/day)<br>Etoricoxib (10 mg/day)<br>Etoricoxib (30 mg/day)<br>Etoricoxib (60 mg/day) | 617  | 72 | 61 | Knee            | Yes     | Unclear | Low | Low     | Low | Unclear |

Comparative effectiveness of non-steroidal anti-inflammatory drugs and opioid therapy

|                         |                                                                                                                             |      |    |    |              |         |         |     |         |     |         |
|-------------------------|-----------------------------------------------------------------------------------------------------------------------------|------|----|----|--------------|---------|---------|-----|---------|-----|---------|
| Hartrick (2009)         | Etoricoxib (90 mg/day)                                                                                                      | 674  | 48 | 61 | Knee and hip | Yes     | Unclear | Low | Low     | Low | High    |
|                         | Placebo oral<br>Oxycodone (33 mg/day)<br>Tapentadol (189 mg/day)<br>Tapentadol (272 mg/day)                                 |      |    |    |              |         |         |     |         |     |         |
| Herrero-Beaumont (2007) | Placebo oral                                                                                                                | 325  | 86 | 64 | Knee         | Yes     | Low     | Low | Low     | Low | High    |
| Hochberg (2011)         | Paracetamol (3000 mg/day)                                                                                                   | 615  | 63 | 62 | Knee         | Yes     | Low     | Low | Unclear | Low | High    |
|                         | Placebo oral<br>Celecoxib (200 mg/day)<br>Naproxen (1000 mg/day) with esomeprazole                                          |      |    |    |              |         |         |     |         |     |         |
| Hochberg (2011)         | Placebo oral<br>Celecoxib (200 mg/day)<br>Naproxen (1000 mg/day) with esomeprazole                                          | 619  | 63 | 62 | Knee         | Yes     | Low     | Low | Unclear | Low | High    |
| Hosie (1996)            | Diclofenac (100 mg/day)<br>Meloxicam (7.5 mg/day)                                                                           | 336  | 59 | 64 | Knee and hip | Unclear | Unclear | Low | Low     | Low | High    |
| Hosie (1997)            | Meloxicam (15 mg/day)<br>Piroxicam (20 mg/day)                                                                              | 455  | 57 | 65 | Knee and hip | Yes     | Unclear | Low | Low     | Low | Low     |
| Husby (1986)            | Naproxen (750 mg/day)<br>Piroxicam (20 mg/day)                                                                              | 2035 | 70 | 67 | Knee and hip | Unclear | Unclear | Low | Low     | Low | Low     |
| Huskisson (1999)        | Diclofenac (150 mg/day)<br>Nimesulide (200 mg/day)                                                                          | 279  | 65 | 65 | Knee and hip | Unclear | Unclear | Low | Low     | Low | Low     |
| James (2010)            | Buprenorphine sublingual (.87 mg/day)<br>Buprenorphine transdermal (.30 mg/day)                                             | 238  | 63 | 64 | Knee and hip | Unclear | Unclear | Low | Low     | Low | High    |
| Jensen (1994)           | Dextropropoxyphene (300 mg/day)<br>Tramadol (300 mg/day)                                                                    | 264  | 79 | 67 | Knee and hip | Unclear | Unclear | Low | Low     | Low | Unclear |
| Kageyama (1987)         | Placebo topical<br>Piroxicam topical (20 mg/day)                                                                            | 246  | 82 | NR | Knee         | Unclear | Unclear | Low | Low     | Low | Unclear |
| Karlsson (2009)         | Placebo oral<br>Naproxcinod (750 mg/day)<br>Naproxcinod (1500 mg/day)<br>Naproxcinod (2250 mg/day)<br>Rofecoxib (25 mg/day) | 543  | 65 | 62 | Knee and hip | Yes     | Unclear | Low | Low     | Low | High    |
| Katz (2010)             | Placebo oral<br>Morphine (43.5 mg/day) with naltrexone                                                                      | 344  | 58 | 55 | Knee and hip | Yes     | Low     | Low | Low     | Low | Low     |
| Kennedy (1994)          | Diclofenac (150 mg/day)                                                                                                     | 239  | 70 | 64 | Knee         | Unclear | Unclear | Low | Low     | Low | High    |

Comparative effectiveness of non-steroidal anti-inflammatory drugs and opioid therapy

| Study (Year)      | Intervention                     | n    | Events | Events | Site         | Quality | Confidence | Confidence | Confidence | Confidence | Confidence |
|-------------------|----------------------------------|------|--------|--------|--------------|---------|------------|------------|------------|------------|------------|
| Kivitz (2001)     | Ketoprofen (200 mg/day)          | 491  | 70     | 60     | Knee         | Yes     | Unclear    | Low        | Low        | Low        | Unclear    |
|                   | Placebo oral                     |      |        |        |              |         |            |            |            |            |            |
| Kivitz (2001)     | Ibuprofen (400 mg/day)           | 1061 | 66     | 63     | Hip          | Yes     | Unclear    | Low        | Low        | Low        | High       |
|                   | Oxaprozin (1200 mg/day)          |      |        |        |              |         |            |            |            |            |            |
|                   | Oxaprozin (1800 mg/day)          |      |        |        |              |         |            |            |            |            |            |
|                   | Placebo oral                     |      |        |        |              |         |            |            |            |            |            |
| Kivitz (2002)     | Celecoxib (100 mg/day)           | 1019 | 65     | 60     | Knee         | Yes     | Unclear    | Low        | Low        | Low        | High       |
|                   | Celecoxib (200 mg/day)           |      |        |        |              |         |            |            |            |            |            |
|                   | Celecoxib (400 mg/day)           |      |        |        |              |         |            |            |            |            |            |
|                   | Naproxen (1000 mg/day)           |      |        |        |              |         |            |            |            |            |            |
| Kivitz (2004)     | Placebo oral                     | 1042 | 68     | 63     | Knee         | Yes     | Unclear    | Low        | Low        | Low        | Unclear    |
|                   | Nabumetone (1000 mg/day)         |      |        |        |              |         |            |            |            |            |            |
|                   | Rofecoxib (12.5 mg/day)          |      |        |        |              |         |            |            |            |            |            |
|                   | Placebo oral                     |      |        |        |              |         |            |            |            |            |            |
| Kneer (2013)      | Placebo topical                  | 867  | 68     | 62     | Knee         | Yes     | Unclear    | Low        | Low        | Low        | High       |
|                   | Ketoprofen topical (50 mg/day)   |      |        |        |              |         |            |            |            |            |            |
|                   | Ketoprofen topical (100 mg/day)  |      |        |        |              |         |            |            |            |            |            |
|                   | Ketoprofen topical (200 mg/day)  |      |        |        |              |         |            |            |            |            |            |
| Kornasoff (1997)  | Aceclofenac (200 mg/day)         | 374  | 64     | 61     | Knee         | Unclear | Unclear    | Low        | Low        | Low        | Unclear    |
| Kriegel (2001)    | Naproxen (1000 mg/day)           | 370  | 72     | 65     | Knee         | Yes     | Unclear    | Low        | Low        | Low        | Low        |
|                   | Nimesulide (200 mg/day)          |      |        |        |              |         |            |            |            |            |            |
| Langford (2006)   | Placebo transdermal              | 416  | 64     | 66     | Knee and hip | Yes     | Low        | Low        | Low        | Low        | High       |
|                   | Fentanyl transdermal (.6 mg/day) |      |        |        |              |         |            |            |            |            |            |
| Laws (1990)       | Diclofenac (100 mg/day)          | 243  | 56     | 64     | Knee and hip | No      | Unclear    | Low        | Low        | Low        | Unclear    |
|                   | Nabumetone (1000 mg/day)         |      |        |        |              |         |            |            |            |            |            |
| Lee (1985)        | Placebo oral                     | 422  | 67     | 61     | Knee         | No      | Unclear    | Unclear    | Unclear    | Unclear    | High       |
|                   | Diflunisal (750 mg/day)          |      |        |        |              |         |            |            |            |            |            |
| Lee (2017)        | Diflunisal (1000 mg/day)         | 362  | 85     | 62     | Knee and hip | Yes     | Low        | Low        | Low        | Low        | Low        |
|                   | Placebo oral                     |      |        |        |              |         |            |            |            |            |            |
| Lehmann (2005)    | Celecoxib (200 mg/day)           | 1684 | 70     | 62     | Knee         | Yes     | Unclear    | Low        | Low        | Low        | Low        |
|                   | Polmacoxib (2 mg/day)            |      |        |        |              |         |            |            |            |            |            |
| Levenstein (1985) | Placebo oral                     | 309  | 72     | 59     | Knee and hip | Unclear | Unclear    | Low        | Low        | Low        | High       |
|                   | Indomethacin (75 mg/day)         |      |        |        |              |         |            |            |            |            |            |
|                   | Isoxicam (200 mg/day)            |      |        |        |              |         |            |            |            |            |            |

Comparative effectiveness of non-steroidal anti-inflammatory drugs and opioid therapy

|                              |                                                                                             |     |    |    |                 |         |         |     |     |     |         |
|------------------------------|---------------------------------------------------------------------------------------------|-----|----|----|-----------------|---------|---------|-----|-----|-----|---------|
| Linden (1996)                | Meloxicam (15 mg/day)<br>Piroxicam (20 mg/day)                                              | 285 | 56 | 67 | Hip             | Yes     | Unclear | Low | Low | Low | Low     |
| Lohmander (2005)             | Placebo oral<br>Naproxinod (1500 mg/day)<br>Naproxen (1000 mg/day)                          | 970 | 73 | 59 | Knee<br>and hip | Unclear | Unclear | Low | Low | Low | High    |
| Lucker (1994)                | Etodolac (600 mg/day)<br>Nimesulide (200 mg/day)                                            | 200 | 67 | 64 | Knee            | Unclear | Unclear | Low | Low | Low | High    |
| Lund (1998)                  | Placebo oral<br>Meloxicam (7.5 mg/day)<br>Meloxicam (15 mg/day)                             | 513 | 58 | 68 | Knee            | Yes     | Unclear | Low | Low | Low | Low     |
| Makarowski (1996)            | Placebo oral<br>Nabumetone (1500 mg/day)<br>Oxaprozin (1200 mg/day)                         | 347 | 68 | 61 | Knee            | Unclear | Unclear | Low | Low | Low | Unclear |
| Makarowski (2002)            | Placebo oral<br>Naproxen (1000 mg/day)<br>Valdecoxib (5 mg/day)<br>Valdecoxib (10 mg/day)   | 467 | 68 | 62 | Hip             | Yes     | Unclear | Low | Low | Low | High    |
| Malonne (2004)               | Placebo oral<br>Tramadol (200 mg/day)                                                       | 231 | 72 | 67 | Knee<br>and hip | Unclear | Unclear | Low | Low | Low | High    |
| Matsumoto (2005)             | Placebo oral<br>Oxycodone (40 mg/day)<br>Oxymorphone (40 mg/day)<br>Oxymorphone (80 mg/day) | 491 | 60 | 62 | Knee<br>and hip | Yes     | Unclear | Low | Low | Low | High    |
| McKenna (2001)               | Placebo oral<br>Celecoxib (200 mg/day)<br>Diclofenac (150 mg/day)                           | 600 | 65 | 62 | Knee            | Unclear | Unclear | Low | Low | Low | High    |
| Melo-Gomes (1993)            | Diclofenac (100 mg/day)/misoprostol<br>Naproxen (750 mg/day)<br>Piroxicam (20 mg/day)       | 643 | 76 | 60 | Knee<br>and hip | Unclear | Unclear | Low | Low | Low | Low     |
| Miceli-Richard (2004)        | Placebo oral<br>Paracetamol (4000 mg/day)                                                   | 779 | 75 | 70 | Knee            | Yes     | Unclear | Low | Low | Low | Low     |
| Morgan (2001)                | Diclofenac (133 mg/day)<br>Nabumetone (1596 mg/day)                                         | 335 | 70 | 72 | Knee<br>and hip | Unclear | Unclear | Low | Low | Low | High    |
| Mullican (2001)              | Codeine (105 mg/day)<br>Tramadol (131 mg/day)                                               | 462 | 62 | 58 | Knee<br>and hip | Yes     | Unclear | Low | Low | Low | High    |
| Munera (2010)                | Placebo transdermal<br>Buprenorphine transdermal (.30 mg/day)                               | 315 | 67 | 61 | Knee<br>and hip | Yes     | Unclear | Low | Low | Low | High    |
| Mylykangas-Luosujarvi (2002) | Naproxen (1000 mg/day)<br>Rofecoxib (12.5 mg/day)                                           | 944 | 78 | 62 | Knee<br>and hip | No      | Unclear | Low | Low | Low | Low     |

Comparative effectiveness of non-steroidal anti-inflammatory drugs and opioid therapy

|                                      |                                                                                                |      |    |    |                 |         |         |         |         |         |      |
|--------------------------------------|------------------------------------------------------------------------------------------------|------|----|----|-----------------|---------|---------|---------|---------|---------|------|
| NCT00531427 (2010)                   | Placebo topical<br>Buprenorphine_Transdermal<br>(.36 mg/day)                                   | 570  | 62 | 59 | Knee            | Unclear | Unclear | Low     | Unclear | Low     | Low  |
| NCT00631319 (2009)                   | Placebo oral<br>Hydromorphone (34 mg/day)                                                      | 200  | 54 | 56 | Knee<br>and hip | Yes     | Unclear | Low     | Unclear | Low     | Low  |
| NCT00832416 (2009)                   | Placebo oral<br>Tramadol (100 mg/day)<br>Tramadol (200 mg/day)<br>Tramadol (300 mg/day)        | 565  | 60 | 60 | Knee            | Yes     | Unclear | Unclear | Unclear | Unclear | High |
| NCT00979953 (2010)                   | Placebo oral<br>Oxycodone (40 mg/day)                                                          | 408  | 59 | 57 | Knee            | Yes     | Unclear | Low     | Unclear | Low     | High |
| NCT01430559 (2020)                   | Placebo oral<br>Meloxicam (15 mg/day)                                                          | 293  | 78 | NR | Knee            | Yes     | Unclear | Low     | Low     | Low     | High |
| NCT01768520 (2019)                   | Placebo oral<br>Celecoxib (200 mg/day)                                                         | 338  | 77 | 62 | Knee            | Yes     | Unclear | Unclear | Unclear | Unclear | High |
| NCT01967550 (2015)                   | Placebo topical<br>Diclofenac topical (160 mg/day)                                             | 304  | 64 | 65 | Knee            | Unclear | Unclear | Unclear | Unclear | Unclear | High |
| NCT02121002 (2021)                   | Placebo topical<br>Diclofenac topical (160 mg/day)                                             | 1176 | 64 | 52 | Knee            | Yes     | Unclear | Low     | Low     | Low     | High |
| NCT02596451 (2017)                   | Placebo topical<br>Diclofenac topical (160 mg/day)                                             | 1164 | 63 | 56 | Knee            | Unclear | Unclear | Low     | Low     | Low     | High |
| NCT02913521 (2021)                   | Placebo topical<br>Diclofenac topical (160 mg/day)                                             | 934  | 62 | 57 | Knee            | Unclear | Unclear | Low     | Low     | Low     | High |
| Niethard (2005)                      | Placebo topical<br>Diclofenac topical (160 mg/day)                                             | 238  | 63 | 66 | Knee            | Yes     | Low     | Low     | Low     | Low     | High |
| Novartis (2002)                      | Placebo oral<br>Lumiracoxib (400 mg/day)<br>Rofecoxib (25 mg/day)                              | 511  | NR | NR | Hip             | Unclear | Unclear | Unclear | Unclear | Unclear | Low  |
| Novartis<br>[CCOX189A2303]<br>(2002) | Placebo oral<br>Celecoxib (400 mg/day)<br>Lumiracoxib (200 mg/day)<br>Lumiracoxib (400 mg/day) | 408  | 59 | 65 | Knee            | Yes     | Unclear | Low     | Low     | Low     | Low  |
| Pareek (2006)                        | Diclofenac (150 mg/day)<br>Aceclofenac (200 mg/day)                                            | 247  | 67 | 53 | Knee            | No      | Low     | Low     | Low     | Low     | High |
| Pareek (2011)                        | Diclofenac (150 mg/day)<br>Zaltoprofen (240 mg/day)                                            | 213  | 59 | 53 | Knee            | Yes     | Unclear | Low     | Low     | Low     | High |
| Pareek (2013)                        | Aceclofenac (200 mg/day)<br>Diclofenac (150 mg/day)                                            | 591  | 66 | 53 | Knee            | Yes     | Unclear | Low     | Low     | Low     | High |
| Paul (2009)                          | Placebo oral<br>Aceclofenac (200 mg/day)<br>Nabumetone (1500 mg/day)                           | 423  | 55 | 53 | Knee            | Unclear | Unclear | Low     | Low     | Low     | High |
| Paulsen (1991)                       | Etodolac (600 mg/day)<br>Piroxicam (20 mg/day)                                                 | 220  | 77 | 58 | Knee            | Unclear | Unclear | Low     | Low     | Low     | High |



Comparative effectiveness of non-steroidal anti-inflammatory drugs and opioid therapy

|                  |                                                                                             |     |    |    |                 |         |         |     |         |     |      |
|------------------|---------------------------------------------------------------------------------------------|-----|----|----|-----------------|---------|---------|-----|---------|-----|------|
| Petrick (1983)   | Placebo oral<br>Meclofenamate (300 mg/day)                                                  | 417 | 69 | 65 | Knee<br>and hip | Unclear | Unclear | Low | Low     | Low | Low  |
| Pincus (2001)    | Paracetamol (4000 mg/day)<br>Diclofenac (150<br>mg/day)/misoprostol                         | 227 | 70 | 61 | Knee<br>and hip | Unclear | Unclear | Low | Low     | Low | High |
| Pincus (2004)    | Placebo oral<br>Paracetamol (4000 mg/day)<br>Celecoxib (200 mg/day)                         | 524 | 63 | 63 | Knee<br>and hip | Yes     | Unclear | Low | Low     | Low | Low  |
| Pincus (2004)    | Placebo oral<br>Paracetamol (4000 mg/day)<br>Celecoxib (200 mg/day)                         | 556 | 66 | 63 | Knee<br>and hip | Yes     | Unclear | Low | Low     | Low | Low  |
| Prior (2014)     | Placebo oral<br>Paracetamol (3900 mg/day)                                                   | 542 | 74 | 62 | Knee<br>and hip | Unclear | Unclear | Low | Low     | Low | Low  |
| Puopolo (2007)   | Placebo oral<br>Etoricoxib (30 mg/day)<br>Ibuprofen (2400 mg/day)                           | 548 | 76 | 63 | Knee<br>and hip | Unclear | Low     | Low | Low     | Low | High |
| Rauck (2013)     | Placebo oral<br>Hydromorphone (8 mg/day)<br>Hydromorphone (16 mg/day)                       | 990 | 63 | 60 | Knee<br>and hip | Yes     | Unclear | Low | Low     | Low | High |
| Reed (2018)      | Placebo oral<br>Paracetamol (3990 mg/day)<br>Paracetamol (4000 mg/day)                      | 708 | 60 | 61 | Knee<br>and hip | Yes     | Low     | Low | Low     | Low | High |
| Reginster (2007) | Placebo oral<br>Etoricoxib (60 mg/day)<br>Naproxen (1000 mg/day)                            | 997 | 72 | 63 | Knee<br>and hip | Unclear | Unclear | Low | Low     | Low | High |
| Reginster (2017) | Placebo oral<br>Celecoxib (200 mg/day)                                                      | 604 | 77 | 65 | Knee            | No      | Unclear | Low | Unclear | Low | High |
| Rogind (1997)    | Etodolac (600 mg/day)<br>Piroxicam (20 mg/day)                                              | 271 | 79 | 67 | Knee<br>and hip | Unclear | Unclear | Low | Low     | Low | High |
| Roth (2004)      | Placebo topical<br>Diclofenac_Topical (77.04<br>mg/day)                                     | 326 | 68 | 64 | Knee            | Unclear | Low     | Low | Low     | Low | High |
| Rother (2007)    | Placebo oral and topical<br>Celecoxib (200 mg/day)<br>Ketoprofen topical (220 mg/day)       | 397 | 60 | 63 | Knee            | Unclear | Low     | Low | Low     | Low | Low  |
| Rother (2013)    | Placebo topical<br>Ketoprofen topical (200 mg/day)                                          | 555 | 62 | 62 | Knee            | Yes     | Unclear | Low | Low     | Low | Low  |
| Saag (2000)      | Placebo oral<br>Ibuprofen (2400 mg/day)<br>Rofecoxib (12.5 mg/day)<br>Rofecoxib (25 mg/day) | 736 | 74 | 61 | Knee<br>and hip | Unclear | Unclear | Low | Low     | Low | Low  |
| Saag (2000)      | Diclofenac (150 mg/day)                                                                     | 693 | 80 | 62 | Knee            | Unclear | Unclear | Low | Low     | Low | Low  |

Comparative effectiveness of non-steroidal anti-inflammatory drugs and opioid therapy

|                  | Rofecoxib (12.5 mg/day)<br>Rofecoxib (25 mg/day) |      |    |    |                 |         |         |      |         |      |         |  |
|------------------|--------------------------------------------------|------|----|----|-----------------|---------|---------|------|---------|------|---------|--|
| Schiff (1996)    | Placebo oral                                     | 347  | 69 | 64 | Knee            | Unclear | Unclear | Low  | Low     | Low  | Unclear |  |
|                  | Naproxen (1000 mg/day)                           |      |    |    |                 |         |         |      |         |      |         |  |
| Schiff (2004)    | Placebo oral                                     | 461  | 69 | 61 | Knee            | Unclear | Unclear | Low  | Low     | Low  | High    |  |
|                  | Ibuprofen (1200 mg/day)                          |      |    |    |                 |         |         |      |         |      |         |  |
|                  | Naproxen (550 mg/day)                            |      |    |    |                 |         |         |      |         |      |         |  |
| Schnitzer (1999) | Placebo oral                                     | 240  | 61 | 61 | Knee            | Unclear | Unclear | Low  | Low     | Low  | Unclear |  |
|                  | Tramadol (200 mg/day)                            |      |    |    |                 |         |         |      |         |      |         |  |
| Schnitzer (2005) | Placebo oral                                     | 672  | 62 | 60 | Knee            | Yes     | Unclear | Low  | Low     | Low  | High    |  |
|                  | Naproxcinod (250 mg/day)                         |      |    |    |                 |         |         |      |         |      |         |  |
|                  | Naproxcinod (750 mg/day)                         |      |    |    |                 |         |         |      |         |      |         |  |
|                  | Naproxcinod (1500 mg/day)                        |      |    |    |                 |         |         |      |         |      |         |  |
|                  | Naproxen (1000 mg/day)                           |      |    |    |                 |         |         |      |         |      |         |  |
|                  | Rofecoxib (25 mg/day)                            |      |    |    |                 |         |         |      |         |      |         |  |
| Schnitzer (2005) | Paracetamol (4000 mg/day)                        | 1578 | 67 | 62 | Knee            | Yes     | Unclear | Low  | Low     | Low  | High    |  |
|                  | Celecoxib (200 mg/day)                           |      |    |    |                 |         |         |      |         |      |         |  |
|                  | Rofecoxib (12.5 mg/day)                          |      |    |    |                 |         |         |      |         |      |         |  |
|                  | Rofecoxib (25 mg/day)                            |      |    |    |                 |         |         |      |         |      |         |  |
| Schnitzer (2009) | Paracetamol (3900 mg/day)                        | 403  | 58 | 60 | Knee            | Unclear | Unclear | Low  | Low     | Low  | High    |  |
|                  | Rofecoxib (12.5 mg/day)                          |      |    |    |                 |         |         |      |         |      |         |  |
|                  | Rofecoxib (25 mg/day)                            |      |    |    |                 |         |         |      |         |      |         |  |
| Schnitzer (2010) | Placebo oral                                     | 918  | 70 | 61 | Knee            | Yes     | Unclear | Low  | Unclear | Low  | High    |  |
|                  | Naproxcinod (750 mg/day)                         |      |    |    |                 |         |         |      |         |      |         |  |
|                  | Naproxcinod (1500 mg/day)                        |      |    |    |                 |         |         |      |         |      |         |  |
|                  | Naproxen (1000 mg/day)                           |      |    |    |                 |         |         |      |         |      |         |  |
| Schnitzer (2011) | Placebo oral                                     | 1020 | 70 | 60 | Knee            | Yes     | Unclear | Low  | Unclear | Low  | High    |  |
|                  | Naproxcinod (750 mg/day)                         |      |    |    |                 |         |         |      |         |      |         |  |
|                  | Naproxcinod (1500 mg/day)                        |      |    |    |                 |         |         |      |         |      |         |  |
|                  | Naproxen (1000 mg/day)                           |      |    |    |                 |         |         |      |         |      |         |  |
| Schnitzer (2011) | Placebo oral                                     | 1262 | 62 | 62 | Hip             | Yes     | Unclear | Low  | Low     | Low  | Low     |  |
|                  | Celecoxib (200 mg/day)                           |      |    |    |                 |         |         |      |         |      |         |  |
|                  | Lumiracoxib (100 mg/day)                         |      |    |    |                 |         |         |      |         |      |         |  |
| Schnitzer (2015) | Celecoxib (200 mg/day)                           | 1424 | NR | NR | Knee<br>and hip | Yes     | Unclear | Low  | Low     | Low  | High    |  |
|                  | Naproxen (1000 mg/day)                           |      |    |    |                 |         |         |      |         |      |         |  |
| Scott (2000)     | Diclofenac (100 mg/day)                          | 399  | 57 | 63 | Knee<br>and hip | Unclear | Unclear | Low  | Low     | Low  | High    |  |
|                  | Nabumetone (1500 mg/day)                         |      |    |    |                 |         |         |      |         |      |         |  |
| Scott (2000)     | Nabumetone (1831 mg/day)                         | 295  | 48 | 63 | Knee<br>and hip | Unclear | Unclear | Low  | Low     | Low  | High    |  |
|                  | Piroxicam (25.5 mg/day)                          |      |    |    |                 |         |         |      |         |      |         |  |
| Scott (2000)     | Placebo oral                                     | 812  | 70 | 61 | Knee            | Unclear | Unclear | High | Low     | High | Unclear |  |
|                  | Indomethacin (75 mg/day)                         |      |    |    |                 |         |         |      |         |      |         |  |
|                  | Tiaprofenic acid (600 mg/day)                    |      |    |    |                 |         |         |      |         |      |         |  |

Comparative effectiveness of non-steroidal anti-inflammatory drugs and opioid therapy

|                    |                                                                                                 |      |    |    |              |         |         |      |         |         |         |
|--------------------|-------------------------------------------------------------------------------------------------|------|----|----|--------------|---------|---------|------|---------|---------|---------|
| Serrie (2017)      | Placebo oral<br>Oxycodone (54.1 mg/day)<br>Tapentadol (315.2 mg/day)                            | 990  | 71 | 62 | Knee         | Yes     | Low     | Low  | Low     | Low     | High    |
| Shannon (2005)     | Placebo topical<br>Buprenorphine transdermal (.30 mg/day)                                       | 327  | 67 | 61 | Knee and hip | Unclear | Unclear | Low  | Unclear | Unclear | High    |
| Sheldon (2005)     | Placebo oral<br>Celecoxib (200 mg/day)<br>Lumiracoxib (100 mg/day)                              | 1551 | 62 | 61 | Knee         | Yes     | Unclear | Low  | Low     | Low     | Low     |
| Silverfield (2002) | Placebo oral<br>Tramadol (225 mg/day) with Paracetamol                                          | 308  | 72 | 60 | Knee and hip | Yes     | Unclear | Low  | Low     | Low     | High    |
| Simon (2009)       | Placebo oral<br>Diclofenac_Topical (77.04 mg/day)<br>Diclofenac (100 mg/day)<br>Placebo topical | 775  | 62 | 62 | Knee         | Yes     | Unclear | Low  | Low     | Low     | High    |
| Smugar (2006)      | Placebo oral<br>Celecoxib (200 mg/day)<br>Rofecoxib (12.5 mg/day)<br>Rofecoxib (25 mg/day)      | 1521 | 68 | 62 | Knee and hip | Yes     | Unclear | Low  | Low     | Low     | High    |
| Smugar (2006)      | Placebo oral<br>Celecoxib (200 mg/day)<br>Rofecoxib (25 mg/day)                                 | 1082 | 66 | 62 | Knee and hip | Yes     | Unclear | Low  | Low     | Low     | High    |
| Sowers (2005)      | Naproxen (1000 mg/day)<br>Celecoxib (200 mg/day)<br>Rofecoxib (25 mg/day)                       | 404  | 60 | 63 | Knee and hip | Yes     | Unclear | Low  | Low     | Low     | High    |
| Spierings (2013)   | Placebo oral<br>Oxycodone (25.8 mg/day)                                                         | 614  | 62 | 57 | Knee and hip | Yes     | Unclear | High | Unclear | High    | High    |
| Tannenbaum (2004)  | Placebo oral<br>Celecoxib (200 mg/day)<br>Lumiracoxib (200 mg/day)<br>Lumiracoxib (400 mg/day)  | 1702 | 69 | 64 | Knee         | Yes     | Unclear | Low  | Low     | Low     | Low     |
| Temple (2006)      | Paracetamol (4000 mg/day)<br>Naproxen (750 mg/day)                                              | 581  | 68 | 59 | Knee and hip | Unclear | Unclear | Low  | Low     | Low     | Unclear |
| The (1997)         | Diclofenac (100 mg/day)<br>Meloxicam (15 mg/day)                                                | 258  | 81 | 71 | Knee         | Yes     | Unclear | Low  | Low     | Low     | Low     |
| Torri (1994)       | Aceclofenac (200 mg/day)<br>Piroxicam (20 mg/day)                                               | 205  | 62 | 57 | Knee         | Unclear | Unclear | Low  | Low     | Low     | High    |
| Tugwell (2004)     | Diclofenac (150 mg/day)<br>Diclofenac topical (75 mg/day)                                       | 622  | 57 | 64 | Knee         | Yes     | Low     | Low  | Low     | Low     | High    |
| Underwood (2008)   | Ibuprofen (1200 mg/day)                                                                         | 282  | 54 | 63 | Knee         | Yes     | Low     | High | High    | High    | High    |

Comparative effectiveness of non-steroidal anti-inflammatory drugs and opioid therapy

|                     |                                  |     |    |    |              |         |         |         |         |         |         |  |
|---------------------|----------------------------------|-----|----|----|--------------|---------|---------|---------|---------|---------|---------|--|
|                     | Ibuprofen topical (1500mg/day)   |     |    |    |              |         |         |         |         |         |         |  |
| Vojtassak (2011)    | Placebo oral                     | 288 | 72 | 67 | Knee and hip | Unclear | Low     | Low     | Low     | Low     | High    |  |
|                     | Hydromorphone (13.9 mg/day)      |     |    |    |              |         |         |         |         |         |         |  |
| Wadsworth (2016)    | Placebo topical                  | 260 | 67 | 61 | Knee         | Yes     | Low     | Unclear | Unclear | Unclear | High    |  |
|                     | Diclofenac topical (80.8 mg/day) |     |    |    |              |         |         |         |         |         |         |  |
| Ward (1995)         | Aceclofenac (200 mg/day)         | 397 | 56 | 62 | Knee         | Yes     | Unclear | Low     | Low     | Low     | Unclear |  |
|                     | Diclofenac (150 mg/day)          |     |    |    |              |         |         |         |         |         |         |  |
| Weaver (1995)       | Placebo oral                     | 328 | 71 | 63 | Knee         | Yes     | Unclear | Low     | Low     | Low     | Low     |  |
|                     | Nabumetone (1000 mg/day)         |     |    |    |              |         |         |         |         |         |         |  |
|                     | Oxaprozin (1200 mg/day)          |     |    |    |              |         |         |         |         |         |         |  |
| Weaver (2006)       | Placebo oral                     | 978 | 70 | 63 | Knee         | Yes     | Unclear | Low     | Low     | Low     | Unclear |  |
|                     | Nabumetone (1000 mg/day)         |     |    |    |              |         |         |         |         |         |         |  |
|                     | Rofecoxib (12.5 mg/day)          |     |    |    |              |         |         |         |         |         |         |  |
| Wiesenhutter (2005) | Placebo oral                     | 528 | 70 | 62 | Knee and hip | Unclear | Unclear | Low     | Low     | Low     | High    |  |
|                     | Etoricoxib (30 mg/day)           |     |    |    |              |         |         |         |         |         |         |  |
|                     | Ibuprofen (2400 mg/day)          |     |    |    |              |         |         |         |         |         |         |  |
| Williams (1989)     | Placebo oral                     | 210 | 55 | 63 | Knee and hip | Unclear | Unclear | Low     | Low     | Low     | High    |  |
|                     | Etodolac (600 mg/day)            |     |    |    |              |         |         |         |         |         |         |  |
| Williams (2000)     | Placebo oral                     | 686 | 66 | 63 | Knee         | Yes     | Unclear | Low     | Low     | Low     | High    |  |
|                     | Celecoxib (200 mg/day)           |     |    |    |              |         |         |         |         |         |         |  |
| Williams (2001)     | Placebo oral                     | 718 | 70 | 62 | Knee         | Yes     | Unclear | Low     | Low     | Low     | High    |  |
|                     | Celecoxib (200 mg/day)           |     |    |    |              |         |         |         |         |         |         |  |
| Wittenberg (2006)   | Placebo oral                     | 364 | 58 | 65 | Knee         | Unclear | Unclear | Low     | Low     | Low     | Low     |  |
|                     | Celecoxib (400 mg/day)           |     |    |    |              |         |         |         |         |         |         |  |
|                     | Lumiracoxib (400 mg/day)         |     |    |    |              |         |         |         |         |         |         |  |
| Yataba (2017)       | Placebo topical                  | 509 | 84 | 67 | Knee         | Yes     | Unclear | Low     | Low     | Low     | High    |  |
|                     | S-Flurbiprofen (10mg/day)        |     |    |    |              |         |         |         |         |         |         |  |
|                     | S-Flurbiprofen (20mg/day)        |     |    |    |              |         |         |         |         |         |         |  |
|                     | S-Flurbiprofen (40mg/day)        |     |    |    |              |         |         |         |         |         |         |  |
| Yocum (2000)        | Placebo oral                     | 779 | 65 | 63 | Knee and hip | Yes     | Unclear | Low     | Low     | Low     | High    |  |
|                     | Diclofenac (100 mg/day)          |     |    |    |              |         |         |         |         |         |         |  |
|                     | Meloxicam (3.75 mg/day)          |     |    |    |              |         |         |         |         |         |         |  |
|                     | Meloxicam (7.5 mg/day)           |     |    |    |              |         |         |         |         |         |         |  |
|                     | Meloxicam (15 mg/day)            |     |    |    |              |         |         |         |         |         |         |  |
| Yoo (2014)          | Celecoxib (200 mg/day)           | 239 | 90 | 63 | Knee         | Unclear | Unclear | Low     | Low     | Low     | High    |  |
|                     | Etoricoxib (30 mg/day)           |     |    |    |              |         |         |         |         |         |         |  |
| Young (1983)        | Indomethacin (105 mg/day)        | 223 | 59 | 62 | Hip          | Unclear | Unclear | Unclear | Unclear | Unclear | Unclear |  |
|                     | Indomethacin (210 mg/day)        |     |    |    |              |         |         |         |         |         |         |  |
| Zacher (2003)       | Diclofenac (150 mg/day)          | 516 | 80 | 63 | Knee and hip | Unclear | Unclear | Low     | Low     | Low     | High    |  |
|                     | Etoricoxib (60 mg/day)           |     |    |    |              |         |         |         |         |         |         |  |

**Web-appendix 12. Summary risk of bias**

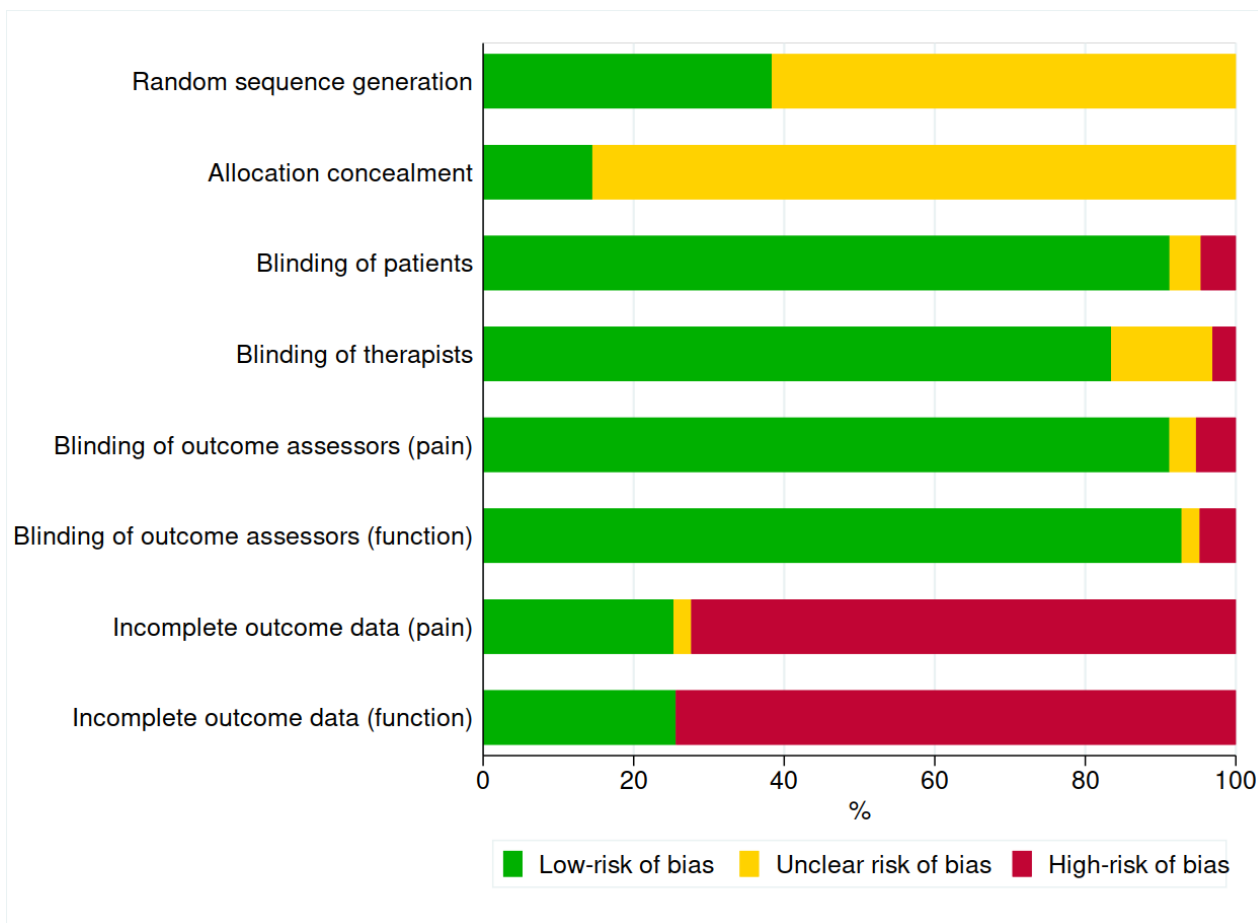

**Web-appendix 13. Dose-response analysis**

| <b>Intervention</b>     | <b>P for linear dose-effect*</b> |
|-------------------------|----------------------------------|
| <b>Paracetamol</b>      |                                  |
| Paracetamol <2000mg     |                                  |
| Paracetamol 3000mg      | 0.80                             |
| Paracetamol 3900-4000mg |                                  |
| <b>NSAIDS - Oral</b>    |                                  |
| Aceclofenac 200mg       | -                                |
| Celecoxib 100mg         |                                  |
| Celecoxib 200mg         | 0.030                            |
| Celecoxib 400mg         |                                  |
| Diclofenac ≤75mg        |                                  |
| Diclofenac 100-105mg    | 0.17                             |
| Diclofenac 114-133mg    |                                  |
| Diclofenac 150mg        |                                  |
| Diflunisal 750mg        | 0.69                             |
| Diflunisal 1000mg       |                                  |
| Etodolac 600mg          | -                                |
| Etoricoxib 5-10mg       |                                  |
| Etoricoxib 30mg         | 0.014                            |
| Etoricoxib 60mg         |                                  |
| Etoricoxib 90mg         |                                  |
| Ibuprofen 1200mg        |                                  |
| Ibuprofen 1500-1600mg   | 0.44                             |
| Ibuprofen 2400mg        |                                  |
| Isoxicam 200mg          | 0.98                             |
| Isoxicam 300mg          |                                  |
| Ketoprofen 200mg        | -                                |
| Lornoxicam 16mg         | -                                |
| Lumiracoxib 100mg       |                                  |
| Lumiracoxib 200mg       | 0.95                             |
| Lumiracoxib 400mg       |                                  |
| Meloxicam ≤10mg         | 0.23                             |
| Meloxicam 15mg          |                                  |
| Nabumetone 1000mg       | 0.56                             |
| Nabumetone 1500-1830mg  |                                  |
| Naproxcinod 250mg       |                                  |
| Naproxcinod 750mg       | 0.015                            |
| Naproxcinod 1500mg      |                                  |
| Naproxcinod 2250mg      |                                  |

Comparative effectiveness of non-steroidal anti-inflammatory drugs and opioid therapy

|                                       |       |
|---------------------------------------|-------|
| Naproxen ≤750mg                       | 0.89  |
| Naproxen 1000mg                       |       |
| Nimesulide 200mg                      | 0.75  |
| Nimesulide 800mg                      |       |
| Piroxicam 20mg                        | 0.98  |
| Piroxicam 25.5mg                      |       |
| Polmacoxib 2mg                        | -     |
| Rofecoxib 5mg                         |       |
| Rofecoxib 12.5mg                      | 0.44  |
| Rofecoxib 25mg                        |       |
| Rofecoxib 50mg                        |       |
| Tiaprofenic acid 600mg                | -     |
| Valdecoxib 5mg                        |       |
| Valdecoxib 10mg                       | 0.68  |
| Valdecoxib 20mg                       |       |
| Zaltoprofen 240mg                     | -     |
| <b>NSAIDs - Topical</b>               |       |
| Diclofenac topical 70-81mg            | 0.63  |
| Diclofenac topical 140-160mg          |       |
| S-flurbiprofen plaster ≤20mg          | 0.63  |
| S-flurbiprofen plaster 40mg           |       |
| Ketoprofen topical 50mg               |       |
| Ketoprofen topical 100mg              | 0.89  |
| Ketoprofen topical 200-220mg          |       |
| Piroxicam topical 15mg                | -     |
| <b>Opioids</b>                        |       |
| Buprenorphine sublingual 0.87mg       | -     |
| Buprenorphine transdermal 0.30-0.36mg | -     |
| Codeine 100-130mg                     | -     |
| Dextropropoxyphene 300mg              | -     |
| Fentanyl transdermal 0.6mg            | -     |
| Hydromorphone 8mg                     |       |
| Hydromorphone 13.9-16mg               | 0.54  |
| Hydromorphone 34mg                    |       |
| Morphine with naltrexone 43.5mg       | -     |
| Oxycodone ≤40mg                       | 0.66  |
| Oxycodone ≥48mg                       |       |
| Oxymorphone 40mg                      | 0.80  |
| Oxymorphone 80mg                      |       |
| Tapentadol <316mg                     | -     |
| Tramadol 100-131mg                    | 0.035 |

## Comparative effectiveness of non-steroidal anti-inflammatory drugs and opioid therapy

|                                |   |
|--------------------------------|---|
| Tramadol 200mg                 |   |
| Tramadol 275-300mg             |   |
| Tramadol 400mg                 |   |
| Tramadol/paracetamol 154-225mg | - |
| <b>Placebos</b>                |   |
| Placebo topical                | - |
| Placebo oral and topical       | - |

\*Lower p-values indicate stronger evidence of a linear association between drug dose and treatment effects (i.e. association between higher doses and larger treatment effects).



Comparative effectiveness of non-steroidal anti-inflammatory drugs and opioid therapy

Web-appendix 14. Differences in pain intensity expressed as effect sizes comparing each intervention to oral placebo over time

|                            | Effect size (95% CrI)/Pr(MID)  |                                |                               |
|----------------------------|--------------------------------|--------------------------------|-------------------------------|
|                            | Week 1                         | Week 6                         | Week 12                       |
| <b>Paracetamol</b>         |                                |                                |                               |
| Paracetamol <2000mg        | -0.05 (-0.92 to 0.79) / 23.8   | -0.07 (-0.56 to 0.44) / 11.8   | -0.05 (-0.30 to 0.20) / 0.6   |
| Paracetamol 3000mg         | -0.25 (-0.65 to 0.16) / 28.4   | -0.21 (-0.81 to 0.39) / 29.7   | -0.17 (-0.69 to 0.34) / 22.9  |
| Paracetamol 3900-4000mg    | -0.14 (-0.28 to -0.01) / 0.1   | -0.15 (-0.25 to -0.05) / 0.0   | -0.12 (-0.24 to 0.01) / 0.0   |
| <b>NSAIDs - Oral</b>       |                                |                                |                               |
| Aceclofenac 200mg          | -0.61 (-0.87 to -0.35) / 96.4  | -0.56 (-0.78 to -0.34) / 95.1  | -0.56 (-0.78 to -0.33) / 95.1 |
| Celecoxib 100mg            | -0.11 (-0.43 to 0.21) / 5.4    | -0.10 (-0.26 to 0.06) / 0.0    | -0.07 (-0.23 to 0.09) / 0.0   |
| Celecoxib 200mg            | -0.34 (-0.43 to -0.26) / 27.5  | -0.35 (-0.40 to -0.30) / 20.0  | -0.32 (-0.37 to -0.26) / 2.5  |
| Celecoxib 400mg            | -0.39 (-0.58 to -0.20) / 58.1  | -0.32 (-0.47 to -0.16) / 24.7  | -0.26 (-0.41 to -0.10) / 7.5  |
| Diclofenac ≤75mg           | -0.59 (-0.93 to -0.23) / 88.2  | -0.42 (-0.65 to -0.18) / 65.1  | -0.36 (-0.59 to -0.14) / 46.7 |
| Diclofenac 100-105mg       | -0.53 (-0.80 to -0.26) / 87.8  | -0.47 (-0.63 to -0.31) / 88.4  | -0.42 (-0.54 to -0.30) / 76.8 |
| Diclofenac 114-133mg       | -0.66 (-1.90 to 0.56) / 68.2   | -0.64 (-1.40 to 0.11) / 75.9   | -0.65 (-1.06 to -0.25) / 91.2 |
| Diclofenac 150mg           | -0.59 (-0.77 to -0.40) / 98.7  | -0.56 (-0.68 to -0.45) / 99.9  | -0.53 (-0.65 to -0.40) / 99.4 |
| Diflunisal 750mg           | -0.45 (-1.18 to 0.29) / 58.4   | -0.33 (-0.69 to 0.03) / 41.2   | -0.33 (-0.92 to 0.27) / 44.7  |
| Diflunisal 1000mg          | -0.42 (-1.17 to 0.32) / 55.4   | -0.40 (-0.77 to -0.04) / 57.0  | -0.40 (-1.01 to 0.21) / 54.2  |
| Etodolac 600mg             | -0.89 (-1.14 to -0.64) / 100.0 | -0.57 (-0.83 to -0.31) / 93.1  | -0.44 (-0.69 to -0.18) / 69.2 |
| Etoricoxib 5-10mg          | -0.18 (-0.42 to 0.06) / 5.4    | -0.21 (-0.43 to 0.02) / 7.5    | -0.16 (-0.54 to 0.22) / 13.8  |
| Etoricoxib 30mg            | -0.51 (-0.69 to -0.33) / 93.5  | -0.48 (-0.63 to -0.34) / 94.3  | -0.44 (-0.56 to -0.32) / 86.0 |
| Etoricoxib 60mg            | -0.70 (-0.92 to -0.48) / 99.9  | -0.65 (-0.82 to -0.48) / 99.9  | -0.46 (-0.63 to -0.29) / 84.6 |
| Etoricoxib 90mg            | -0.89 (-1.15 to -0.62) / 100.0 | -0.84 (-1.09 to -0.59) / 100.0 | -0.88 (-1.27 to -0.49) / 99.5 |
| Ibuprofen 1200mg           | -0.50 (-0.84 to -0.17) / 78.5  | -0.31 (-0.92 to 0.30) / 42.1   | -0.30 (-0.85 to 0.26) / 39.9  |
| Ibuprofen 2400mg           | -0.51 (-0.73 to -0.29) / 89.0  | -0.37 (-0.50 to -0.25) / 52.8  | -0.32 (-0.47 to -0.16) / 24.6 |
| Indomethacin 75mg          | -0.59 (-1.07 to -0.11) / 81.2  | -0.30 (-0.74 to 0.14) / 37.6   | -0.20 (-0.69 to 0.30) / 23.9  |
| Isoxicam 200mg             | -0.45 (-0.91 to 0.02) / 62.5   | -0.59 (-1.08 to -0.09) / 80.6  | -0.47 (-1.09 to 0.14) / 63.2  |
| Ketoprofen 200mg           | -0.59 (-0.96 to -0.23) / 88.6  | -0.60 (-1.06 to -0.13) / 83.0  | -0.63 (-1.01 to -0.25) / 91.5 |
| Lornoxicam 16mg            | -0.74 (-1.34 to -0.14) / 88.9  | -0.73 (-1.32 to -0.14) / 88.1  | -0.70 (-1.45 to 0.06) / 80.1  |
| Lumiracoxib 100mg          | -0.35 (-0.62 to -0.08) / 43.1  | -0.33 (-0.52 to -0.13) / 33.8  | -0.31 (-0.43 to -0.19) / 15.3 |
| Lumiracoxib 200mg          | -0.40 (-0.62 to -0.18) / 59.6  | -0.36 (-0.54 to -0.19) / 46.1  | -0.33 (-0.48 to -0.18) / 29.4 |
| Lumiracoxib 400mg          | -0.45 (-0.64 to -0.26) / 78.8  | -0.39 (-0.59 to -0.18) / 55.9  | -0.33 (-0.46 to -0.20) / 26.0 |
| Meclofenamate sodium 300mg | -0.43 (-0.97 to 0.11) / 59.0   | -0.31 (-0.88 to 0.25) / 41.8   | -0.31 (-1.05 to 0.43) / 43.8  |
| Meloxicam ≤10mg            | -0.28 (-0.51 to -0.05) / 22.5  | -0.33 (-0.52 to -0.13) / 33.9  | -0.27 (-0.42 to -0.12) / 9.8  |
| Meloxicam 15mg             | -0.33 (-0.54 to -0.12) / 36.3  | -0.48 (-0.66 to -0.30) / 88.2  | -0.44 (-0.59 to -0.29) / 82.2 |
| Nabumetone 1000mg          | -0.24 (-0.42 to -0.05) / 7.8   | -0.22 (-0.37 to -0.08) / 2.3   | -0.19 (-0.48 to 0.11) / 10.7  |
| Nabumetone 1500-1831mg     | -0.43 (-1.20 to 0.34) / 56.3   | -0.41 (-0.89 to 0.08) / 56.3   | -0.42 (-0.71 to -0.13) / 62.7 |

Comparative effectiveness of non-steroidal anti-inflammatory drugs and opioid therapy

|                                       |                               |                               |                               |
|---------------------------------------|-------------------------------|-------------------------------|-------------------------------|
| Naproxinod 250mg                      | -0.02 (-0.28 to 0.24) / 0.3   | 0.04 (-0.21 to 0.29) / 0.1    | 0.08 (-0.37 to 0.53) / 2.6    |
| Naproxinod 750mg                      | -0.40 (-0.57 to -0.23) / 62.9 | -0.31 (-0.43 to -0.19) / 16.6 | -0.28 (-0.43 to -0.13) / 11.0 |
| Naproxinod 1500mg                     | -0.50 (-0.66 to -0.35) / 95.2 | -0.44 (-0.54 to -0.34) / 92.2 | -0.38 (-0.51 to -0.26) / 57.2 |
| Naproxinod 2250mg                     | -0.58 (-0.84 to -0.32) / 94.1 | -0.47 (-0.73 to -0.22) / 77.9 | -0.45 (-0.90 to 0.02) / 62.5  |
| Naproxen ≤750mg                       | -0.43 (-0.64 to -0.22) / 71.4 | -0.38 (-0.63 to -0.13) / 52.3 | -0.37 (-0.59 to -0.15) / 51.4 |
| Naproxen 1000mg                       | -0.42 (-0.54 to -0.31) / 81.7 | -0.39 (-0.45 to -0.32) / 68.1 | -0.32 (-0.39 to -0.25) / 7.0  |
| Nimesulide 200mg                      | -0.54 (-0.89 to -0.20) / 84.4 | -0.35 (-0.65 to -0.06) / 45.7 | -0.26 (-0.49 to -0.03) / 16.9 |
| Nimesulide 800mg                      | -0.50 (-0.83 to -0.17) / 78.6 | -0.44 (-0.93 to 0.05) / 61.0  | -0.37 (-0.70 to -0.04) / 49.5 |
| Oxaprozin 1200mg                      | -0.50 (-0.78 to -0.21) / 81.9 | -0.61 (-0.89 to -0.32) / 94.6 | -0.59 (-1.11 to -0.08) / 79.4 |
| Piroxicam 20mg                        | -0.53 (-0.72 to -0.33) / 94.4 | -0.48 (-0.67 to -0.28) / 86.4 | -0.49 (-0.67 to -0.30) / 88.6 |
| Piroxicam 25.5mg                      | -0.55 (-1.88 to 0.81) / 60.0  | -0.53 (-1.43 to 0.37) / 63.2  | -0.53 (-1.19 to 0.12) / 68.8  |
| Polmacoxib 2mg                        | -0.32 (-0.94 to 0.32) / 43.4  | -0.28 (-0.55 to -0.02) / 24.9 | -0.26 (-0.75 to 0.25) / 33.1  |
| Rofecoxib 5mg                         | -0.36 (-1.08 to 0.35) / 49.0  | -0.34 (-0.60 to -0.09) / 42.2 | -0.32 (-0.79 to 0.16) / 41.5  |
| Rofecoxib 12.5mg                      | -0.42 (-0.54 to -0.30) / 79.1 | -0.41 (-0.49 to -0.33) / 86.3 | -0.38 (-0.51 to -0.26) / 58.4 |
| Rofecoxib 25mg                        | -0.53 (-0.65 to -0.40) / 99.4 | -0.48 (-0.55 to -0.40) / 99.6 | -0.45 (-0.56 to -0.34) / 92.4 |
| Rofecoxib 50mg                        | -0.79 (-1.51 to -0.07) / 87.2 | -0.77 (-1.05 to -0.49) / 99.8 | -0.75 (-1.23 to -0.27) / 93.9 |
| Tiaprofenic acid 600mg                | -0.39 (-1.06 to 0.28) / 52.0  | -0.27 (-0.74 to 0.22) / 33.5  | -0.24 (-0.76 to 0.29) / 30.8  |
| Tolfenamic acid 600mg                 | -0.69 (-1.12 to -0.27) / 93.2 | -0.65 (-1.45 to 0.13) / 76.0  | -0.62 (-1.51 to 0.28) / 70.3  |
| Valdecoxib 5mg                        | -0.26 (-0.61 to 0.08) / 27.4  | -0.29 (-0.47 to -0.11) / 18.8 | -0.26 (-0.44 to -0.08) / 11.7 |
| Valdecoxib 10mg                       | -0.36 (-0.71 to -0.03) / 48.7 | -0.32 (-0.50 to -0.14) / 29.4 | -0.28 (-0.46 to -0.10) / 16.7 |
| Valdecoxib 20mg                       | -0.42 (-0.87 to 0.04) / 58.2  | -0.37 (-0.59 to -0.14) / 48.5 | -0.32 (-0.52 to -0.12) / 31.1 |
| Zaltoprofen 240mg                     | -0.72 (-1.10 to -0.34) / 96.6 | -0.78 (-1.39 to -0.17) / 90.7 | -0.75 (-1.53 to 0.02) / 83.6  |
| <b>NSAIDs - Topical</b>               |                               |                               |                               |
| Diclofenac topical 70-81mg            | -0.43 (-0.77 to -0.08) / 63.1 | -0.54 (-0.77 to -0.31) / 92.3 | -0.44 (-0.60 to -0.27) / 78.9 |
| Diclofenac topical 140-160mg          | -0.35 (-0.66 to -0.02) / 44.0 | -0.61 (-0.87 to -0.35) / 96.3 | -0.51 (-0.71 to -0.31) / 91.9 |
| S-flurbiprofen plaster ≤20mg          | -0.20 (-0.60 to 0.20) / 20.6  | -0.25 (-0.92 to 0.42) / 36.2  | -0.19 (-0.94 to 0.62) / 32.8  |
| S-flurbiprofen plaster 40mg           | -0.30 (-0.73 to 0.13) / 38.0  | -0.41 (-1.20 to 0.37) / 53.9  | -0.35 (-1.24 to 0.58) / 48.4  |
| Ibuprofen topical 1500mg              | -0.38 (-1.41 to 0.64) / 50.9  | -0.19 (-1.03 to 0.66) / 33.7  | -0.18 (-0.80 to 0.44) / 27.2  |
| Ketoprofen topical 50mg               | -0.16 (-1.00 to 0.67) / 31.3  | -0.15 (-0.64 to 0.33) / 18.7  | -0.10 (-0.35 to 0.16) / 1.9   |
| Ketoprofen topical 100mg              | -0.48 (-1.01 to 0.04) / 65.4  | -0.22 (-0.49 to 0.06) / 14.1  | -0.20 (-0.42 to 0.02) / 6.3   |
| Ketoprofen topical 200-220mg          | -0.17 (-0.51 to 0.18) / 12.0  | -0.23 (-0.39 to -0.06) / 4.4  | -0.19 (-0.36 to -0.02) / 2.0  |
| Piroxicam topical 15mg                | 0.19 (-0.63 to 1.03) / 9.0    | 0.39 (-0.49 to 1.25) / 4.3    | 0.40 (-0.54 to 1.33) / 5.6    |
| <b>Opioids</b>                        |                               |                               |                               |
| Buprenorphine sublingual 0.87mg       | -0.19 (-0.75 to 0.37) / 26.3  | -0.35 (-1.39 to 0.69) / 48.7  | -0.34 (-1.42 to 0.76) / 47.8  |
| Buprenorphine transdermal 0.28-0.36mg | -0.19 (-0.51 to 0.13) / 13.9  | -0.36 (-0.73 to 0.01) / 47.9  | -0.35 (-0.61 to -0.08) / 43.5 |
| Codeine 105-127mg                     | -0.04 (-0.33 to 0.25) / 1.3   | -0.19 (-0.62 to 0.24) / 19.9  | -0.21 (-0.58 to 0.16) / 19.9  |
| Fentanyl transdermal 0.6mg            | -0.36 (-0.76 to 0.04) / 47.8  | -0.31 (-0.69 to 0.07) / 37.6  | -0.24 (-0.85 to 0.37) / 33.9  |
| Hydromorphone 8mg                     | -0.04 (-0.88 to 0.83) / 21.7  | -0.01 (-0.53 to 0.50) / 8.7   | -0.03 (-0.26 to 0.21) / 0.2   |

Comparative effectiveness of non-steroidal anti-inflammatory drugs and opioid therapy

|                                 |                               |                               |                               |
|---------------------------------|-------------------------------|-------------------------------|-------------------------------|
| Hydromorphone 13.9-16mg         | -0.20 (-0.49 to 0.09) / 12.3  | -0.16 (-0.51 to 0.18) / 12.0  | -0.19 (-0.39 to -0.00) / 4.0  |
| Hydromorphone 34mg              | -0.00 (-0.99 to 0.98) / 23.4  | -0.00 (-0.61 to 0.60) / 11.6  | -0.00 (-0.34 to 0.33) / 1.6   |
| Morphine with naltrexone 43.5mg | -0.25 (-1.21 to 0.71) / 40.2  | -0.25 (-0.82 to 0.32) / 34.1  | -0.24 (-0.53 to 0.05) / 19.8  |
| Oxycodone ≤40mg                 | -0.08 (-0.42 to 0.27) / 4.9   | -0.09 (-0.41 to 0.22) / 4.5   | -0.03 (-0.29 to 0.24) / 0.6   |
| Oxycodone ≥48mg                 | -0.26 (-0.43 to -0.08) / 10.1 | -0.17 (-0.33 to -0.01) / 0.9  | -0.13 (-0.28 to 0.02) / 0.1   |
| Oxymorphone 40mg                | -0.22 (-0.88 to 0.45) / 32.9  | -0.23 (-0.77 to 0.30) / 31.1  | -0.21 (-0.86 to 0.46) / 31.2  |
| Oxymorphone 80mg                | -0.30 (-0.95 to 0.37) / 41.6  | -0.32 (-0.86 to 0.22) / 42.3  | -0.29 (-0.95 to 0.38) / 40.3  |
| Tapentadol <316mg               | -0.13 (-0.31 to 0.04) / 0.5   | -0.34 (-0.50 to -0.17) / 33.9 | -0.33 (-0.49 to -0.18) / 31.9 |
| Tramadol 100-131mg              | -0.12 (-0.29 to 0.04) / 0.2   | -0.12 (-0.25 to 0.01) / 0.0   | -0.07 (-0.21 to 0.06) / 0.0   |
| Tramadol 200mg                  | -0.26 (-0.41 to -0.11) / 7.9  | -0.13 (-0.26 to 0.00) / 0.0   | -0.12 (-0.25 to 0.01) / 0.0   |
| Tramadol 275-300mg              | -0.28 (-0.43 to -0.13) / 11.2 | -0.31 (-0.43 to -0.20) / 18.1 | -0.29 (-0.41 to -0.18) / 9.0  |
| Tramadol 400mg                  | -0.20 (-0.45 to 0.05) / 8.4   | -0.23 (-0.46 to -0.01) / 11.8 | -0.20 (-0.43 to 0.03) / 7.7   |
| Tramadol/paracetamol 154-225mg  | -0.63 (-0.94 to -0.32) / 95.0 | -0.39 (-0.88 to 0.09) / 53.0  | -0.31 (-0.59 to -0.02) / 33.1 |
| <b>Placebos</b>                 |                               |                               |                               |
| Placebo topical                 | -0.10 (-0.38 to 0.19) / 3.1   | -0.23 (-0.39 to -0.06) / 4.6  | -0.15 (-0.30 to -0.01) / 0.2  |
| Placebo oral and topical        | 0.09 (-0.67 to 0.87) / 12.2   | 0.07 (-0.22 to 0.35) / 0.2    | 0.11 (-0.40 to 0.61) / 3.3    |

MID: between-group minimum clinically important difference; 95% CrI: 95% credible interval

Light green ES: lower bound of 95% CrI <0; dark green ES: lower bound of 95% CrI ≤-0.37

Comparative effectiveness of non-steroidal anti-inflammatory drugs and opioid therapy

**Web-appendix 15. Treatment effect estimates for pain (effect sizes [95% CrI]) adjusted by risk of bias**

|                         | Unadjusted            | Adjustment for risk of bias regarding |                       |                       |                              |                         |
|-------------------------|-----------------------|---------------------------------------|-----------------------|-----------------------|------------------------------|-------------------------|
|                         |                       | Allocation concealment                | Blinding of patients  | Blinding of therapist | Blinding of outcome assessor | Incomplete outcome data |
| <b>Paracetamol</b>      |                       |                                       |                       |                       |                              |                         |
| Paracetamol <2000mg     | -0.07 (-0.56 to 0.44) | -0.03 (-0.54 to 0.47)                 | -0.07 (-0.56 to 0.44) | -0.07 (-0.57 to 0.42) | -0.07 (-0.57 to 0.43)        | -0.06 (-0.56 to 0.44)   |
| Paracetamol 3000mg      | -0.21 (-0.81 to 0.39) | -0.21 (-0.81 to 0.39)                 | -0.21 (-0.83 to 0.37) | -0.21 (-0.81 to 0.38) | -0.22 (-0.82 to 0.38)        | -0.21 (-0.80 to 0.39)   |
| Paracetamol 3900-4000mg | -0.15 (-0.25 to 0.05) | -0.13 (-0.24 to 0.02)                 | -0.15 (-0.26 to 0.05) | -0.16 (-0.26 to 0.05) | -0.16 (-0.26 to 0.05)        | -0.15 (-0.25 to 0.05)   |
| <b>NSAIDs - Oral</b>    |                       |                                       |                       |                       |                              |                         |
| Acetofenac 200mg        | -0.56 (-0.78 to 0.34) | -0.54 (-0.76 to 0.32)                 | -0.56 (-0.78 to 0.33) | -0.56 (-0.78 to 0.34) | -0.55 (-0.78 to 0.34)        | -0.57 (-0.78 to 0.35)   |
| Celecoxib 100mg         | -0.10 (-0.26 to 0.06) | -0.06 (-0.23 to 0.11)                 | -0.10 (-0.26 to 0.06) | -0.11 (-0.27 to 0.05) | -0.10 (-0.26 to 0.06)        | -0.05 (-0.22 to 0.11)   |
| Celecoxib 200mg         | -0.35 (-0.40 to 0.30) | -0.32 (-0.39 to 0.24)                 | -0.35 (-0.40 to 0.31) | -0.36 (-0.41 to 0.31) | -0.35 (-0.40 to 0.30)        | -0.31 (-0.38 to 0.25)   |
| Celecoxib 400mg         | -0.32 (-0.47 to 0.16) | -0.28 (-0.45 to 0.11)                 | -0.32 (-0.47 to 0.17) | -0.33 (-0.48 to 0.17) | -0.32 (-0.47 to 0.17)        | -0.28 (-0.43 to 0.11)   |
| Diclofenac ≤75mg        | -0.42 (-0.65 to 0.18) | -0.39 (-0.63 to 0.16)                 | -0.42 (-0.65 to 0.19) | -0.42 (-0.65 to 0.19) | -0.42 (-0.65 to 0.19)        | -0.40 (-0.63 to 0.16)   |
| Diclofenac 100-105mg    | -0.47 (-0.63 to 0.31) | -0.45 (-0.62 to 0.27)                 | -0.47 (-0.64 to 0.31) | -0.48 (-0.64 to 0.31) | -0.47 (-0.64 to 0.31)        | -0.43 (-0.60 to 0.25)   |
| Diclofenac 114-133mg    | -0.64 (-1.40 to 0.11) | -0.63 (-1.38 to 0.13)                 | -0.70 (-1.46 to 0.07) | -0.67 (-1.44 to 0.08) | -0.70 (-1.45 to 0.06)        | -0.60 (-1.36 to 0.15)   |
| Diclofenac 150mg        | -0.56 (-0.68 to 0.45) | -0.53 (-0.66 to 0.40)                 | -0.56 (-0.68 to 0.45) | -0.57 (-0.68 to 0.46) | -0.56 (-0.68 to 0.45)        | -0.53 (-0.65 to 0.40)   |
| Diflunisal 750mg        | -0.33 (-0.69 to 0.03) | -0.29 (-0.66 to 0.07)                 | -0.42 (-0.80 to 0.04) | -0.38 (-0.75 to 0.00) | -0.42 (-0.80 to 0.04)        | -0.28 (-0.64 to 0.08)   |
| Diflunisal 1000mg       | -0.40 (-0.77 to 0.04) | -0.36 (-0.73 to 0.00)                 | -0.49 (-0.88 to 0.10) | -0.45 (-0.83 to 0.07) | -0.49 (-0.88 to 0.10)        | -0.35 (-0.72 to 0.02)   |
| Etodolac 600mg          | -0.57 (-0.83 to 0.31) | -0.54 (-0.81 to 0.27)                 | -0.57 (-0.84 to 0.31) | -0.57 (-0.84 to 0.31) | -0.57 (-0.83 to 0.31)        | -0.57 (-0.84 to 0.31)   |
| Etoricoxib 5-10mg       | -0.21 (-0.43 to 0.02) | -0.16 (-0.40 to 0.07)                 | -0.20 (-0.43 to 0.02) | -0.21 (-0.43 to 0.02) | -0.20 (-0.43 to 0.02)        | -0.15 (-0.39 to 0.08)   |
| Etoricoxib 30mg         | -0.48 (-0.63 to 0.34) | -0.44 (-0.61 to 0.28)                 | -0.49 (-0.63 to 0.34) | -0.49 (-0.63 to 0.34) | -0.48 (-0.63 to 0.34)        | -0.43 (-0.59 to 0.27)   |

Comparative effectiveness of non-steroidal anti-inflammatory drugs and opioid therapy

|                            |                        |                        |                        |                        |                        |                        |
|----------------------------|------------------------|------------------------|------------------------|------------------------|------------------------|------------------------|
| Etoricoxib 60mg            | -0.65 (-0.82 to -0.48) | -0.60 (-0.79 to -0.42) | -0.64 (-0.81 to -0.47) | -0.65 (-0.82 to -0.48) | -0.64 (-0.81 to -0.47) | -0.59 (-0.77 to -0.40) |
| Etoricoxib 90mg            | -0.84 (-1.09 to -0.59) | -0.80 (-1.06 to -0.54) | -0.83 (-1.09 to -0.59) | -0.84 (-1.09 to -0.59) | -0.84 (-1.09 to -0.59) | -0.79 (-1.05 to -0.53) |
| Ibuprofen 1200mg           | -0.31 (-0.92 to 0.30)  | -0.28 (-0.88 to 0.34)  | -0.32 (-0.94 to 0.28)  | -0.31 (-0.92 to 0.29)  | -0.32 (-0.93 to 0.29)  | -0.26 (-0.86 to 0.34)  |
| Ibuprofen 2400mg           | -0.37 (-0.50 to 0.25)  | -0.34 (-0.48 to 0.20)  | -0.38 (-0.50 to 0.25)  | -0.38 (-0.50 to 0.25)  | -0.38 (-0.50 to 0.25)  | -0.34 (-0.47 to 0.20)  |
| Indomethacin 75mg          | -0.30 (-0.74 to 0.14)  | -0.26 (-0.71 to 0.17)  | -0.37 (-0.83 to 0.08)  | -0.30 (-0.74 to 0.13)  | -0.37 (-0.83 to 0.09)  | -0.27 (-0.71 to 0.17)  |
| Isoxicam 200mg             | -0.59 (-1.08 to 0.09)  | -0.56 (-1.07 to 0.07)  | -0.62 (-1.13 to 0.12)  | -0.60 (-1.10 to 0.11)  | -0.62 (-1.11 to 0.12)  | -0.56 (-1.05 to 0.06)  |
| Ketoprofen 200mg           | -0.60 (-1.06 to 0.13)  | -0.53 (-1.01 to 0.05)  | -0.60 (-1.07 to 0.14)  | -0.60 (-1.07 to 0.13)  | -0.60 (-1.06 to 0.13)  | -0.51 (-0.98 to 0.03)  |
| Lornoxicam 16mg            | -0.73 (-1.32 to 0.14)  | -0.70 (-1.29 to 0.11)  | -0.74 (-1.32 to 0.14)  | -0.74 (-1.33 to 0.15)  | -0.73 (-1.31 to 0.14)  | -0.65 (-1.25 to 0.04)  |
| Lumiracoxib 100mg          | -0.33 (-0.52 to 0.13)  | -0.29 (-0.50 to 0.08)  | -0.34 (-0.54 to 0.14)  | -0.34 (-0.54 to 0.14)  | -0.34 (-0.54 to 0.14)  | -0.31 (-0.51 to 0.12)  |
| Lumiracoxib 200mg          | -0.36 (-0.54 to 0.19)  | -0.31 (-0.51 to 0.11)  | -0.37 (-0.54 to 0.19)  | -0.37 (-0.54 to 0.19)  | -0.36 (-0.54 to 0.19)  | -0.33 (-0.51 to 0.15)  |
| Lumiracoxib 400mg          | -0.39 (-0.59 to 0.18)  | -0.35 (-0.57 to 0.13)  | -0.40 (-0.61 to 0.19)  | -0.40 (-0.61 to 0.19)  | -0.40 (-0.61 to 0.19)  | -0.36 (-0.57 to 0.15)  |
| Meclofenamate sodium 300mg | -0.31 (-0.88 to 0.25)  | -0.28 (-0.84 to 0.30)  | -0.32 (-0.88 to 0.25)  | -0.31 (-0.88 to 0.27)  | -0.31 (-0.88 to 0.25)  | -0.31 (-0.88 to 0.26)  |
| Meloxicam ≤10mg            | -0.33 (-0.52 to 0.13)  | -0.29 (-0.50 to 0.08)  | -0.33 (-0.52 to 0.14)  | -0.36 (-0.56 to 0.16)  | -0.33 (-0.52 to 0.13)  | -0.28 (-0.49 to 0.08)  |
| Meloxicam 15mg             | -0.48 (-0.66 to 0.30)  | -0.44 (-0.63 to 0.25)  | -0.48 (-0.66 to 0.30)  | -0.49 (-0.67 to 0.30)  | -0.48 (-0.66 to 0.30)  | -0.44 (-0.62 to 0.25)  |
| Nabumetone 1000mg          | -0.22 (-0.37 to 0.08)  | -0.18 (-0.34 to 0.03)  | -0.23 (-0.37 to 0.08)  | -0.23 (-0.37 to 0.08)  | -0.22 (-0.36 to 0.08)  | -0.19 (-0.33 to 0.04)  |
| Nabumetone 1500-1831mg     | -0.41 (-0.89 to 0.08)  | -0.36 (-0.86 to 0.14)  | -0.47 (-0.97 to 0.03)  | -0.44 (-0.94 to 0.05)  | -0.47 (-0.97 to 0.04)  | -0.32 (-0.83 to 0.18)  |
| Naproxcinod 250mg          | 0.04 (-0.21 to 0.29)   | 0.08 (-0.18 to 0.34)   | 0.04 (-0.21 to 0.29)   | 0.03 (-0.23 to 0.28)   | 0.04 (-0.21 to 0.29)   | 0.09 (-0.18 to 0.35)   |
| Naproxcinod 750mg          | -0.31 (-0.43 to 0.19)  | -0.27 (-0.41 to 0.13)  | -0.31 (-0.44 to 0.19)  | -0.33 (-0.46 to 0.20)  | -0.31 (-0.44 to 0.19)  | -0.26 (-0.40 to 0.13)  |
| Naproxcinod 1500mg         | -0.44 (-0.54 to 0.34)  | -0.40 (-0.52 to 0.29)  | -0.45 (-0.55 to 0.35)  | -0.47 (-0.57 to 0.36)  | -0.44 (-0.55 to 0.34)  | -0.40 (-0.51 to 0.29)  |
| Naproxcinod 2250mg         | -0.47 (-0.73 to 0.22)  | -0.43 (-0.70 to 0.17)  | -0.47 (-0.73 to 0.22)  | -0.48 (-0.75 to 0.23)  | -0.47 (-0.73 to 0.21)  | -0.42 (-0.69 to 0.16)  |

Comparative effectiveness of non-steroidal anti-inflammatory drugs and opioid therapy

|                            |                        |                       |                       |                       |                       |                       |
|----------------------------|------------------------|-----------------------|-----------------------|-----------------------|-----------------------|-----------------------|
| Naproxen ≤750mg            | -0.38 (-0.63 to -0.13) | -0.34 (-0.60 to 0.08) | -0.38 (-0.63 to 0.13) | -0.38 (-0.63 to 0.13) | -0.38 (-0.63 to 0.13) | -0.33 (-0.59 to 0.08) |
| Naproxen 1000mg            | -0.39 (-0.45 to 0.32)  | -0.35 (-0.44 to 0.26) | -0.39 (-0.46 to 0.32) | -0.40 (-0.48 to 0.33) | -0.39 (-0.46 to 0.32) | -0.34 (-0.43 to 0.25) |
| Nimesulide 200mg           | -0.35 (-0.65 to 0.06)  | -0.28 (-0.61 to 0.03) | -0.36 (-0.65 to 0.06) | -0.36 (-0.65 to 0.06) | -0.36 (-0.65 to 0.06) | -0.31 (-0.61 to 0.01) |
| Nimesulide 800mg           | -0.44 (-0.93 to 0.05)  | -0.41 (-0.90 to 0.09) | -0.45 (-0.94 to 0.05) | -0.46 (-0.96 to 0.04) | -0.44 (-0.95 to 0.06) | -0.34 (-0.85 to 0.17) |
| Oxaprozin 1200mg           | -0.61 (-0.89 to 0.32)  | -0.57 (-0.87 to 0.27) | -0.61 (-0.89 to 0.32) | -0.61 (-0.89 to 0.32) | -0.61 (-0.89 to 0.32) | -0.59 (-0.87 to 0.30) |
| Piroxicam 20mg             | -0.48 (-0.67 to 0.28)  | -0.41 (-0.64 to 0.18) | -0.48 (-0.68 to 0.28) | -0.49 (-0.69 to 0.29) | -0.48 (-0.67 to 0.28) | -0.43 (-0.64 to 0.23) |
| Piroxicam 25.5mg           | -0.53 (-1.43 to 0.37)  | -0.44 (-1.37 to 0.51) | -0.58 (-1.51 to 0.32) | -0.55 (-1.46 to 0.37) | -0.59 (-1.49 to 0.33) | -0.39 (-1.35 to 0.55) |
| Polmacoxib 2mg             | -0.28 (-0.55 to 0.02)  | -0.26 (-0.52 to 0.01) | -0.28 (-0.55 to 0.02) | -0.28 (-0.54 to 0.02) | -0.28 (-0.55 to 0.02) | -0.26 (-0.52 to 0.01) |
| Rofecoxib 5mg              | -0.34 (-0.60 to 0.09)  | -0.31 (-0.57 to 0.04) | -0.35 (-0.60 to 0.09) | -0.35 (-0.60 to 0.09) | -0.35 (-0.60 to 0.09) | -0.30 (-0.56 to 0.03) |
| Rofecoxib 12.5mg           | -0.41 (-0.49 to 0.33)  | -0.37 (-0.48 to 0.27) | -0.42 (-0.49 to 0.34) | -0.42 (-0.50 to 0.34) | -0.42 (-0.50 to 0.34) | -0.37 (-0.47 to 0.28) |
| Rofecoxib 25mg             | -0.48 (-0.55 to 0.40)  | -0.44 (-0.54 to 0.33) | -0.48 (-0.56 to 0.40) | -0.48 (-0.56 to 0.41) | -0.48 (-0.56 to 0.40) | -0.44 (-0.53 to 0.34) |
| Rofecoxib 50mg             | -0.77 (-1.05 to 0.49)  | -0.73 (-1.02 to 0.44) | -0.77 (-1.05 to 0.49) | -0.77 (-1.05 to 0.49) | -0.77 (-1.05 to 0.49) | -0.73 (-1.01 to 0.43) |
| Tiaprofenic acid 600mg     | -0.27 (-0.74 to 0.22)  | -0.23 (-0.71 to 0.26) | -0.34 (-0.84 to 0.16) | -0.27 (-0.75 to 0.22) | -0.34 (-0.84 to 0.16) | -0.22 (-0.71 to 0.26) |
| Tolfenamic acid 600mg      | -0.65 (-1.45 to 0.13)  | -0.61 (-1.40 to 0.18) | -0.67 (-1.46 to 0.12) | -0.68 (-1.46 to 0.13) | -0.68 (-1.46 to 0.12) | -0.58 (-1.37 to 0.23) |
| Valdecoxib 5mg             | -0.29 (-0.47 to 0.11)  | -0.25 (-0.44 to 0.06) | -0.29 (-0.47 to 0.11) | -0.30 (-0.47 to 0.12) | -0.29 (-0.47 to 0.12) | -0.24 (-0.42 to 0.05) |
| Valdecoxib 10mg            | -0.32 (-0.50 to 0.14)  | -0.29 (-0.47 to 0.10) | -0.32 (-0.50 to 0.15) | -0.33 (-0.51 to 0.15) | -0.32 (-0.50 to 0.15) | -0.27 (-0.46 to 0.08) |
| Valdecoxib 20mg            | -0.37 (-0.59 to 0.14)  | -0.33 (-0.56 to 0.09) | -0.37 (-0.59 to 0.14) | -0.37 (-0.60 to 0.15) | -0.37 (-0.59 to 0.13) | -0.32 (-0.55 to 0.08) |
| Zaltoprofen 240mg          | -0.78 (-1.39 to 0.17)  | -0.71 (-1.34 to 0.09) | -0.78 (-1.39 to 0.17) | -0.79 (-1.39 to 0.17) | -0.78 (-1.40 to 0.17) | -0.69 (-1.31 to 0.07) |
| <b>NSAIDs - Topical</b>    |                        |                       |                       |                       |                       |                       |
| Diclofenac topical 70-81mg | -0.54 (-0.77 to 0.31)  | -0.52 (-0.76 to 0.28) | -0.57 (-0.81 to 0.34) | -0.56 (-0.80 to 0.33) | -0.57 (-0.81 to 0.33) | -0.46 (-0.72 to 0.21) |

Comparative effectiveness of non-steroidal anti-inflammatory drugs and opioid therapy

|                                       |                        |                        |                        |                        |                        |                        |
|---------------------------------------|------------------------|------------------------|------------------------|------------------------|------------------------|------------------------|
| Diclofenac topical 140-160mg          | -0.61 (-0.87 to -0.35) | -0.57 (-0.85 to -0.30) | -0.64 (-0.90 to -0.37) | -0.62 (-0.89 to -0.36) | -0.64 (-0.90 to -0.36) | -0.52 (-0.81 to -0.25) |
| S-flurbiprofen plaster ≤20mg          | -0.25 (-0.92 to 0.42)  | -0.18 (-0.88 to 0.50)  | -0.28 (-0.95 to 0.40)  | -0.27 (-0.94 to 0.40)  | -0.28 (-0.96 to 0.41)  | -0.17 (-0.86 to 0.53)  |
| S-flurbiprofen plaster 40mg           | -0.41 (-1.20 to 0.37)  | -0.35 (-1.14 to 0.44)  | -0.45 (-1.22 to 0.35)  | -0.44 (-1.20 to 0.34)  | -0.44 (-1.21 to 0.34)  | -0.34 (-1.13 to 0.47)  |
| Ibuprofen topical 1500mg              | -0.19 (-1.03 to 0.66)  | -0.16 (-0.99 to 0.68)  | -0.29 (-1.12 to 0.55)  | -0.24 (-1.09 to 0.60)  | -0.28 (-1.14 to 0.57)  | -0.09 (-0.93 to 0.76)  |
| Ketoprofen topical 50mg               | -0.15 (-0.64 to 0.33)  | -0.10 (-0.59 to 0.39)  | -0.20 (-0.69 to 0.29)  | -0.18 (-0.68 to 0.31)  | -0.20 (-0.69 to 0.30)  | -0.09 (-0.58 to 0.40)  |
| Ketoprofen topical 100mg              | -0.22 (-0.49 to 0.06)  | -0.16 (-0.46 to 0.13)  | -0.31 (-0.63 to -0.00) | -0.27 (-0.56 to 0.02)  | -0.31 (-0.62 to -0.00) | -0.18 (-0.46 to 0.10)  |
| Ketoprofen topical 200-220mg          | -0.23 (-0.39 to -0.06) | -0.19 (-0.37 to -0.01) | -0.26 (-0.43 to -0.09) | -0.25 (-0.41 to -0.08) | -0.26 (-0.43 to -0.08) | -0.19 (-0.36 to -0.01) |
| Piroxicam topical 15mg                | 0.39 (-0.49 to 1.25)   | 0.46 (-0.41 to 1.32)   | 0.38 (-0.49 to 1.23)   | 0.38 (-0.48 to 1.24)   | 0.38 (-0.48 to 1.23)   | 0.49 (-0.36 to 1.35)   |
| <b>Opioids</b>                        |                        |                        |                        |                        |                        |                        |
| Buprenorphine sublingual 0.87mg       | -0.35 (-1.39 to 0.69)  | -0.38 (-1.40 to 0.65)  | -0.38 (-1.38 to 0.66)  | -0.39 (-1.42 to 0.63)  | -0.36 (-1.40 to 0.68)  | -0.39 (-1.43 to 0.64)  |
| Buprenorphine transdermal 0.28-0.36mg | -0.36 (-0.73 to 0.01)  | -0.33 (-0.72 to 0.05)  | -0.37 (-0.75 to 0.01)  | -0.39 (-0.76 to -0.01) | -0.37 (-0.74 to 0.01)  | -0.33 (-0.71 to 0.05)  |
| Codeine 105-127mg                     | -0.19 (-0.62 to 0.24)  | -0.15 (-0.59 to 0.29)  | -0.25 (-0.69 to 0.19)  | -0.24 (-0.67 to 0.20)  | -0.25 (-0.69 to 0.19)  | -0.14 (-0.57 to 0.29)  |
| Fentanyl transdermal 0.6mg            | -0.31 (-0.69 to 0.07)  | -0.30 (-0.67 to 0.09)  | -0.34 (-0.72 to 0.04)  | -0.33 (-0.71 to 0.06)  | -0.34 (-0.72 to 0.04)  | -0.23 (-0.62 to 0.17)  |
| Hydromorphone 8mg                     | -0.01 (-0.53 to 0.50)  | 0.02 (-0.49 to 0.54)   | -0.01 (-0.53 to 0.50)  | -0.01 (-0.53 to 0.50)  | -0.01 (-0.53 to 0.49)  | 0.04 (-0.48 to 0.56)   |
| Hydromorphone 13.9-16mg               | -0.16 (-0.51 to 0.18)  | -0.14 (-0.49 to 0.20)  | -0.16 (-0.50 to 0.18)  | -0.16 (-0.50 to 0.19)  | -0.16 (-0.50 to 0.18)  | -0.11 (-0.46 to 0.23)  |
| Hydromorphone 34mg                    | -0.00 (-0.61 to 0.60)  | 0.03 (-0.56 to 0.64)   | 0.00 (-0.60 to 0.60)   | -0.04 (-0.66 to 0.57)  | -0.00 (-0.61 to 0.60)  | -0.00 (-0.60 to 0.60)  |
| Morphine with naltrexone 43.5mg       | -0.25 (-0.82 to 0.32)  | -0.24 (-0.80 to 0.34)  | -0.24 (-0.82 to 0.33)  | -0.24 (-0.83 to 0.33)  | -0.24 (-0.81 to 0.34)  | -0.25 (-0.83 to 0.32)  |
| Oxycodone ≤40mg                       | -0.09 (-0.41 to 0.22)  | -0.05 (-0.38 to 0.27)  | -0.14 (-0.47 to 0.19)  | -0.13 (-0.45 to 0.19)  | -0.14 (-0.47 to 0.19)  | -0.05 (-0.37 to 0.28)  |
| Oxycodone ≥48mg                       | -0.17 (-0.33 to -0.01) | -0.16 (-0.32 to -0.00) | -0.18 (-0.34 to -0.02) | -0.18 (-0.34 to -0.02) | -0.18 (-0.34 to -0.02) | -0.12 (-0.29 to 0.06)  |
| Oxymorphone 40mg                      | -0.23 (-0.77 to 0.30)  | -0.20 (-0.75 to 0.36)  | -0.26 (-0.80 to 0.28)  | -0.25 (-0.79 to 0.28)  | -0.26 (-0.79 to 0.29)  | -0.19 (-0.73 to 0.36)  |
| Oxymorphone 80mg                      | -0.32 (-0.86 to 0.22)  | -0.28 (-0.81 to 0.25)  | -0.33 (-0.87 to 0.21)  | -0.33 (-0.86 to 0.20)  | -0.34 (-0.88 to 0.20)  | -0.26 (-0.80 to 0.28)  |

Comparative effectiveness of non-steroidal anti-inflammatory drugs and opioid therapy

|                                |                        |                        |                        |                        |                        |                        |
|--------------------------------|------------------------|------------------------|------------------------|------------------------|------------------------|------------------------|
|                                | 0.22)                  | 0.26)                  | 0.19)                  | 0.21)                  | 0.20)                  | 0.28)                  |
| Tapentadol <316mg              | -0.34 (-0.50 to -0.17) | -0.32 (-0.49 to -0.16) | -0.35 (-0.51 to -0.18) | -0.34 (-0.51 to -0.18) | -0.34 (-0.51 to -0.19) | -0.28 (-0.46 to -0.10) |
| Tramadol 100-131mg             | -0.12 (-0.25 to 0.01)  | -0.09 (-0.23 to 0.04)  | -0.14 (-0.27 to 0.00)  | -0.13 (-0.26 to 0.00)  | -0.14 (-0.27 to 0.00)  | -0.07 (-0.21 to 0.08)  |
| Tramadol 200mg                 | -0.13 (-0.26 to 0.00)  | -0.11 (-0.24 to 0.03)  | -0.15 (-0.28 to 0.02)  | -0.14 (-0.27 to 0.01)  | -0.14 (-0.28 to 0.01)  | -0.08 (-0.23 to 0.06)  |
| Tramadol 275-300mg             | -0.31 (-0.43 to -0.20) | -0.29 (-0.42 to -0.17) | -0.33 (-0.45 to -0.21) | -0.32 (-0.44 to -0.20) | -0.33 (-0.45 to -0.21) | -0.27 (-0.40 to -0.14) |
| Tramadol 400mg                 | -0.23 (-0.46 to -0.01) | -0.22 (-0.44 to -0.01) | -0.25 (-0.47 to -0.02) | -0.24 (-0.47 to -0.02) | -0.25 (-0.47 to -0.02) | -0.19 (-0.42 to -0.05) |
| Tramadol/Paracetamol 154-225mg | -0.39 (-0.88 to 0.09)  | -0.35 (-0.85 to 0.14)  | -0.39 (-0.88 to 0.10)  | -0.39 (-0.88 to 0.09)  | -0.39 (-0.89 to 0.10)  | -0.34 (-0.84 to 0.16)  |
| <b>Placebos</b>                |                        |                        |                        |                        |                        |                        |
| Placebo topical                | -0.23 (-0.39 to -0.06) | -0.21 (-0.38 to -0.04) | -0.25 (-0.42 to -0.08) | -0.24 (-0.41 to -0.07) | -0.25 (-0.42 to -0.08) | -0.19 (-0.37 to -0.02) |
| Placebo oral and topical       | 0.07 (-0.22 to 0.35)   | 0.11 (-0.18 to 0.41)   | 0.05 (-0.23 to 0.34)   | 0.06 (-0.23 to 0.34)   | 0.05 (-0.24 to 0.34)   | 0.11 (-0.19 to 0.40)   |

95% CrI: 95% credible interval

Light green ES: lower bound of 95% CrI <0; dark green ES: lower bound of 95% CrI ≤-0.37



**Web-appendix 16. Results for the primary outcome (pain) based on different prior distributions for the between-trial heterogeneity**

|                            | Effect size (95% CI)   |                        |
|----------------------------|------------------------|------------------------|
|                            | Gamma prior            | Normal prior           |
| <b>Paracetamol</b>         |                        |                        |
| Paracetamol <2000mg        | -0.07 (-0.56 to 0.44)  | -0.05 (-0.54 to 0.41)  |
| Paracetamol 3000mg         | -0.21 (-0.81 to 0.39)  | -0.23 (-0.84 to 0.31)  |
| Paracetamol 3900-4000mg    | -0.15 (-0.25 to -0.05) | -0.15 (-0.23 to -0.07) |
| <b>NSAIDs - Oral</b>       |                        |                        |
| Aceclofenac 200mg          | -0.56 (-0.78 to -0.34) | -0.54 (-0.73 to -0.35) |
| Celecoxib 100mg            | -0.10 (-0.26 to 0.06)  | -0.10 (-0.22 to 0.02)  |
| Celecoxib 200mg            | -0.35 (-0.40 to -0.30) | -0.36 (-0.40 to -0.32) |
| Celecoxib 400mg            | -0.32 (-0.47 to -0.16) | -0.32 (-0.44 to -0.20) |
| Diclofenac ≤75mg           | -0.42 (-0.65 to -0.18) | -0.38 (-0.58 to -0.18) |
| Diclofenac 100-105mg       | -0.47 (-0.63 to -0.31) | -0.47 (-0.61 to -0.32) |
| Diclofenac 114-133mg       | -0.64 (-1.40 to 0.11)  | -0.66 (-1.38 to 0.08)  |
| Diclofenac 150mg           | -0.56 (-0.68 to -0.45) | -0.56 (-0.66 to -0.47) |
| Diflunisal 750mg           | -0.33 (-0.69 to 0.03)  | -0.33 (-0.64 to -0.01) |
| Diflunisal 1000mg          | -0.40 (-0.77 to -0.04) | -0.40 (-0.72 to -0.08) |
| Etodolac 600mg             | -0.57 (-0.83 to -0.31) | -0.57 (-0.81 to -0.32) |
| Etoricoxib 5-10mg          | -0.21 (-0.43 to 0.02)  | -0.20 (-0.39 to -0.00) |
| Etoricoxib 30mg            | -0.48 (-0.63 to -0.34) | -0.49 (-0.61 to -0.35) |
| Etoricoxib 60mg            | -0.65 (-0.82 to -0.48) | -0.65 (-0.79 to -0.51) |
| Etoricoxib 90mg            | -0.84 (-1.09 to -0.59) | -0.81 (-1.02 to -0.59) |
| Ibuprofen 1200mg           | -0.31 (-0.92 to 0.30)  | -0.32 (-0.91 to 0.24)  |
| Ibuprofen 2400mg           | -0.37 (-0.50 to -0.25) | -0.38 (-0.48 to -0.27) |
| Indomethacin 75mg          | -0.30 (-0.74 to 0.14)  | -0.28 (-0.71 to 0.13)  |
| Isoxicam 200mg             | -0.59 (-1.08 to -0.09) | -0.60 (-1.07 to -0.14) |
| Ketoprofen 200mg           | -0.60 (-1.06 to -0.13) | -0.60 (-1.03 to -0.15) |
| Lornoxicam 16mg            | -0.73 (-1.32 to -0.14) | -0.74 (-1.29 to -0.16) |
| Lumiracoxib 100mg          | -0.33 (-0.52 to -0.13) | -0.33 (-0.51 to -0.15) |
| Lumiracoxib 200mg          | -0.36 (-0.54 to -0.19) | -0.37 (-0.51 to -0.23) |
| Lumiracoxib 400mg          | -0.39 (-0.59 to -0.18) | -0.39 (-0.58 to -0.20) |
| Meclofenamate sodium 300mg | -0.31 (-0.88 to 0.25)  | -0.32 (-0.87 to 0.22)  |
| Meloxicam ≤10mg            | -0.33 (-0.52 to -0.13) | -0.33 (-0.50 to -0.17) |
| Meloxicam 15mg             | -0.48 (-0.66 to -0.30) | -0.48 (-0.65 to -0.32) |
| Nabumetone 1000mg          | -0.22 (-0.37 to -0.08) | -0.24 (-0.35 to -0.13) |
| Nabumetone 1500-1831mg     | -0.41 (-0.89 to 0.08)  | -0.41 (-0.88 to 0.06)  |
| Naproxcinod 250mg          | 0.04 (-0.21 to 0.29)   | 0.04 (-0.17 to 0.25)   |
| Naproxcinod 750mg          | -0.31 (-0.43 to -0.19) | -0.31 (-0.40 to -0.21) |
| Naproxcinod 1500mg         | -0.44 (-0.54 to -0.34) | -0.44 (-0.52 to -0.36) |
| Naproxcinod 2250mg         | -0.47 (-0.73 to -0.22) | -0.47 (-0.68 to -0.25) |
| Naproxen ≤750mg            | -0.38 (-0.63 to -0.13) | -0.37 (-0.60 to -0.14) |
| Naproxen 1000mg            | -0.39 (-0.45 to -0.32) | -0.39 (-0.45 to -0.34) |
| Nimesulide 200mg           | -0.35 (-0.65 to -0.06) | -0.35 (-0.63 to -0.08) |
| Nimesulide 800mg           | -0.44 (-0.93 to 0.05)  | -0.45 (-0.90 to 0.02)  |
| Oxaprozin 1200mg           | -0.61 (-0.89 to -0.32) | -0.61 (-0.86 to -0.37) |
| Piroxicam 20mg             | -0.48 (-0.67 to -0.28) | -0.47 (-0.65 to -0.29) |
| Piroxicam 25.5mg           | -0.53 (-1.43 to 0.37)  | -0.53 (-1.42 to 0.35)  |
| Polmacoxib 2mg             | -0.28 (-0.55 to -0.02) | -0.29 (-0.50 to -0.07) |
| Rofecoxib 5mg              | -0.34 (-0.60 to -0.09) | -0.35 (-0.56 to -0.13) |
| Rofecoxib 12.5mg           | -0.41 (-0.49 to -0.33) | -0.42 (-0.48 to -0.35) |
| Rofecoxib 25mg             | -0.48 (-0.55 to -0.40) | -0.48 (-0.54 to -0.41) |
| Rofecoxib 50mg             | -0.77 (-1.05 to -0.49) | -0.77 (-1.02 to -0.53) |
| Tiaprofenic acid 600mg     | -0.27 (-0.74 to 0.22)  | -0.26 (-0.71 to 0.20)  |
| Tolfenamic acid 600mg      | -0.65 (-1.45 to 0.13)  | -0.66 (-1.40 to 0.14)  |
| Valdecoxib 5mg             | -0.29 (-0.47 to -0.11) | -0.30 (-0.43 to -0.15) |
| Valdecoxib 10mg            | -0.32 (-0.50 to -0.14) | -0.32 (-0.46 to -0.18) |
| Valdecoxib 20mg            | -0.37 (-0.59 to -0.14) | -0.37 (-0.54 to -0.19) |
| Zaltoprofen 240mg          | -0.78 (-1.39 to -0.17) | -0.79 (-1.37 to -0.20) |

Comparative effectiveness of non-steroidal anti-inflammatory drugs and opioid therapy

**NSAIDs - Topical**

|                              |                        |                        |
|------------------------------|------------------------|------------------------|
| Diclofenac topical 70-81mg   | -0.54 (-0.77 to -0.31) | -0.57 (-0.78 to -0.36) |
| Diclofenac topical 140-160mg | -0.61 (-0.87 to -0.35) | -0.64 (-0.87 to -0.41) |
| S-flurbiprofen plaster ≤20mg | -0.25 (-0.92 to 0.42)  | -0.27 (-0.95 to 0.36)  |
| S-flurbiprofen plaster 40mg  | -0.41 (-1.20 to 0.37)  | -0.45 (-1.22 to 0.30)  |
| Ibuprofen topical 1500mg     | -0.19 (-1.03 to 0.66)  | -0.20 (-1.03 to 0.59)  |
| Ketoprofen topical 50mg      | -0.15 (-0.64 to 0.33)  | -0.17 (-0.62 to 0.29)  |
| Ketoprofen topical 100mg     | -0.22 (-0.49 to 0.06)  | -0.24 (-0.46 to 0.00)  |
| Ketoprofen topical 200-220mg | -0.23 (-0.39 to -0.06) | -0.24 (-0.37 to -0.11) |
| Piroxicam topical 15mg       | 0.39 (-0.49 to 1.25)   | 0.38 (-0.47 to 1.17)   |

**Opioids**

|                                       |                        |                        |
|---------------------------------------|------------------------|------------------------|
| Buprenorphine sublingual 0.87mg       | -0.35 (-1.39 to 0.69)  | -0.40 (-1.40 to 0.63)  |
| Buprenorphine transdermal 0.28-0.36mg | -0.36 (-0.73 to 0.01)  | -0.38 (-0.73 to -0.03) |
| Codeine 105-127mg                     | -0.19 (-0.62 to 0.24)  | -0.20 (-0.61 to 0.19)  |
| Fentanyl transdermal 0.6mg            | -0.31 (-0.69 to 0.07)  | -0.34 (-0.66 to -0.02) |
| Hydromorphone 8mg                     | -0.01 (-0.53 to 0.50)  | -0.01 (-0.50 to 0.49)  |
| Hydromorphone 13.9-16mg               | -0.16 (-0.51 to 0.18)  | -0.16 (-0.49 to 0.16)  |
| Hydromorphone 34mg                    | -0.00 (-0.61 to 0.60)  | 0.01 (-0.57 to 0.59)   |
| Morphine with naltrexone 43.5mg       | -0.25 (-0.82 to 0.32)  | -0.25 (-0.79 to 0.29)  |
| Oxycodone ≤40mg                       | -0.09 (-0.41 to 0.22)  | -0.09 (-0.39 to 0.21)  |
| Oxycodone ≥48mg                       | -0.17 (-0.33 to -0.01) | -0.16 (-0.28 to -0.04) |
| Oxymorphone 40mg                      | -0.23 (-0.77 to 0.30)  | -0.23 (-0.76 to 0.28)  |
| Oxymorphone 80mg                      | -0.32 (-0.86 to 0.22)  | -0.32 (-0.84 to 0.20)  |
| Tapentadol <316mg                     | -0.34 (-0.50 to -0.17) | -0.31 (-0.44 to -0.19) |
| Tramadol 100-131mg                    | -0.12 (-0.25 to 0.01)  | -0.12 (-0.22 to -0.01) |
| Tramadol 200mg                        | -0.13 (-0.26 to 0.00)  | -0.13 (-0.24 to -0.03) |
| Tramadol 275-300mg                    | -0.31 (-0.43 to -0.20) | -0.31 (-0.41 to -0.22) |
| Tramadol 400mg                        | -0.23 (-0.46 to -0.01) | -0.23 (-0.41 to -0.06) |
| Tramadol/Paracetamol 154-225mg        | -0.39 (-0.88 to 0.09)  | -0.39 (-0.87 to 0.08)  |

**Placebos**

|                          |                        |                        |
|--------------------------|------------------------|------------------------|
| Placebo topical          | -0.23 (-0.39 to -0.06) | -0.26 (-0.39 to -0.12) |
| Placebo oral and topical | 0.07 (-0.22 to 0.35)   | 0.06 (-0.18 to 0.30)   |

All treatment effect estimates are comparisons to oral placebo. Negative values suggest that the intervention is better than the oral placebo. ES: effect size; 95% CrI: 95% credible interval. Light green ES: lower bound of 95% CrI <0; dark green ES: lower bound of 95% CrI ≤ -0.37

For the gamma prior,  $1/\tau^2 \sim \text{gamma}(0.1, 0.1) | (0, 2000)$ . For the half-normal prior,  $\tau \sim \text{normal}(0, 1) | (0, )$ .

Comparative effectiveness of non-steroidal anti-inflammatory drugs and opioid therapy

Web-appendix 17. Dropouts due to adverse events and treatment effect on osteoarthritis pain as compared to oral placebo, ordered according to the odds ratio of dropouts due to adverse events.

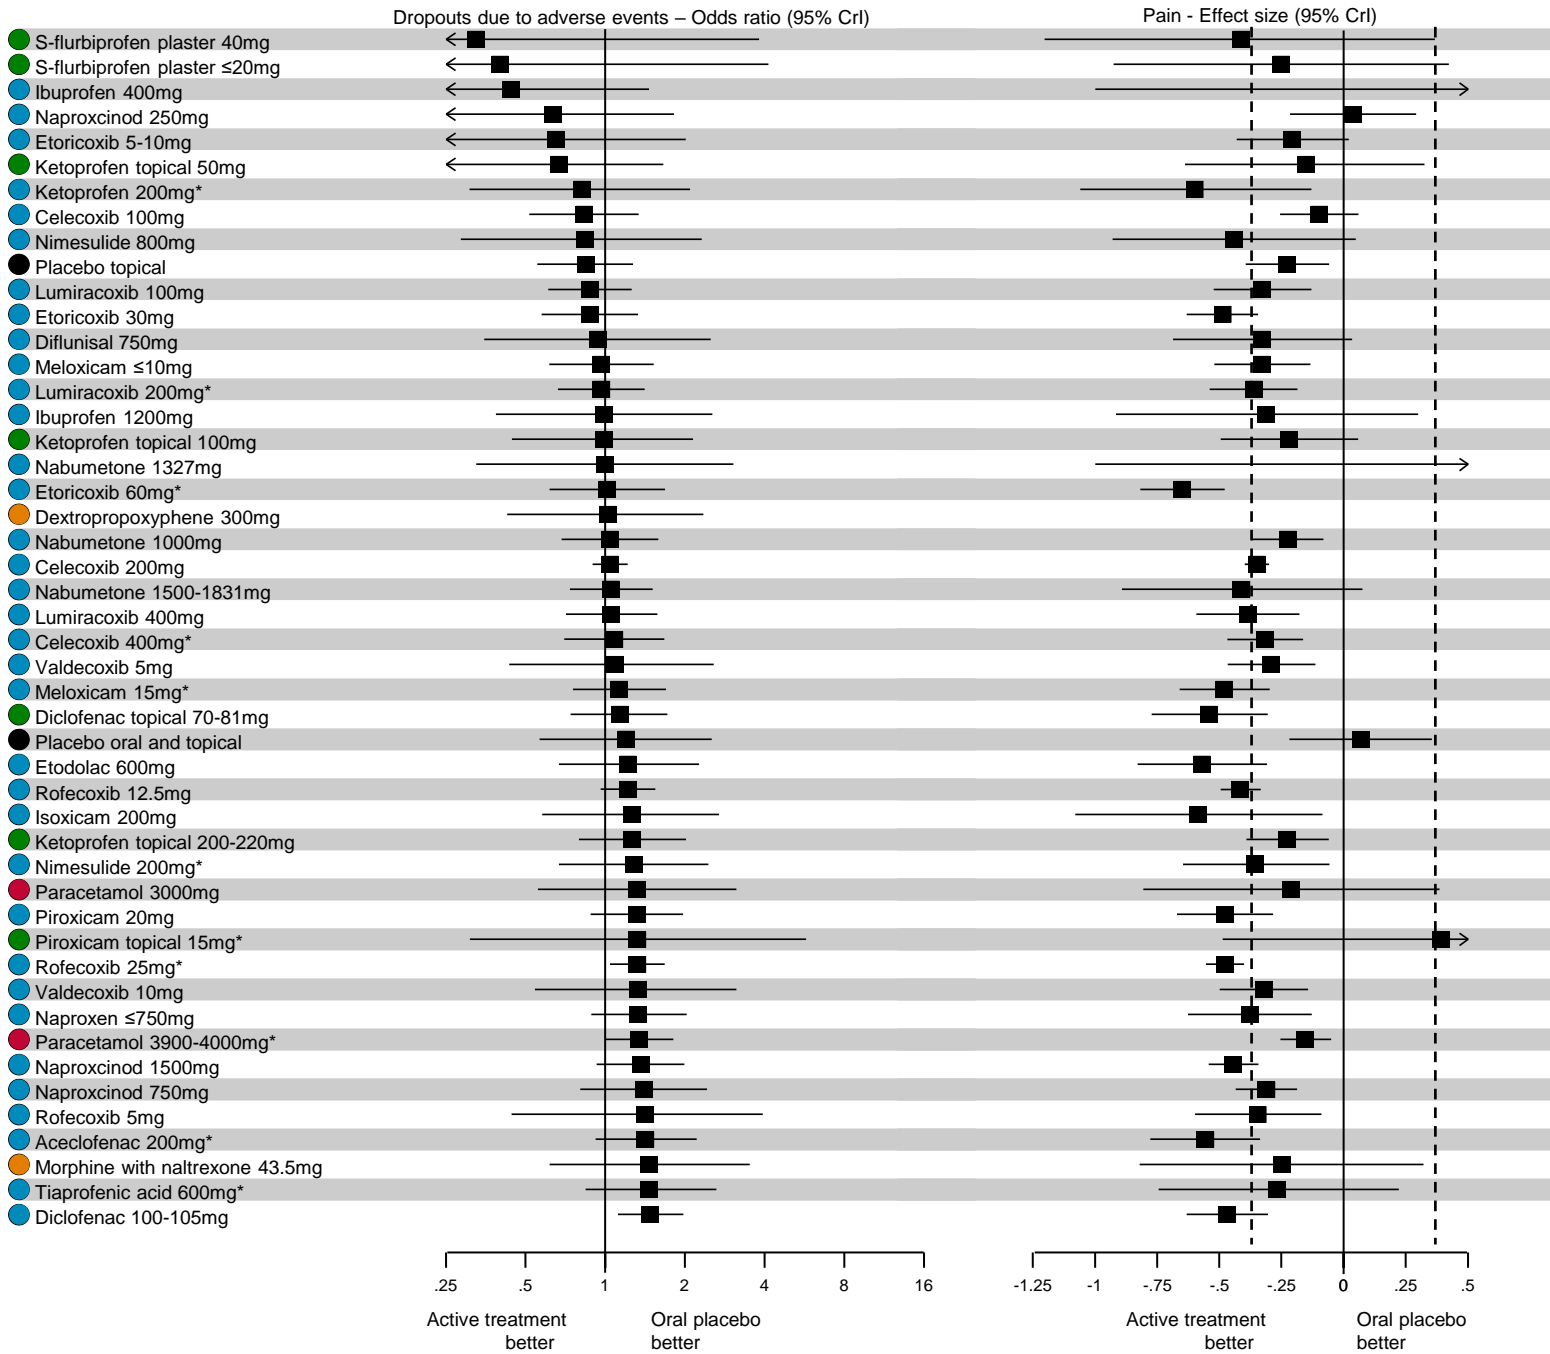

# Comparative effectiveness of non-steroidal anti-inflammatory drugs and opioid therapy

## Web-appendix 17 – Continued

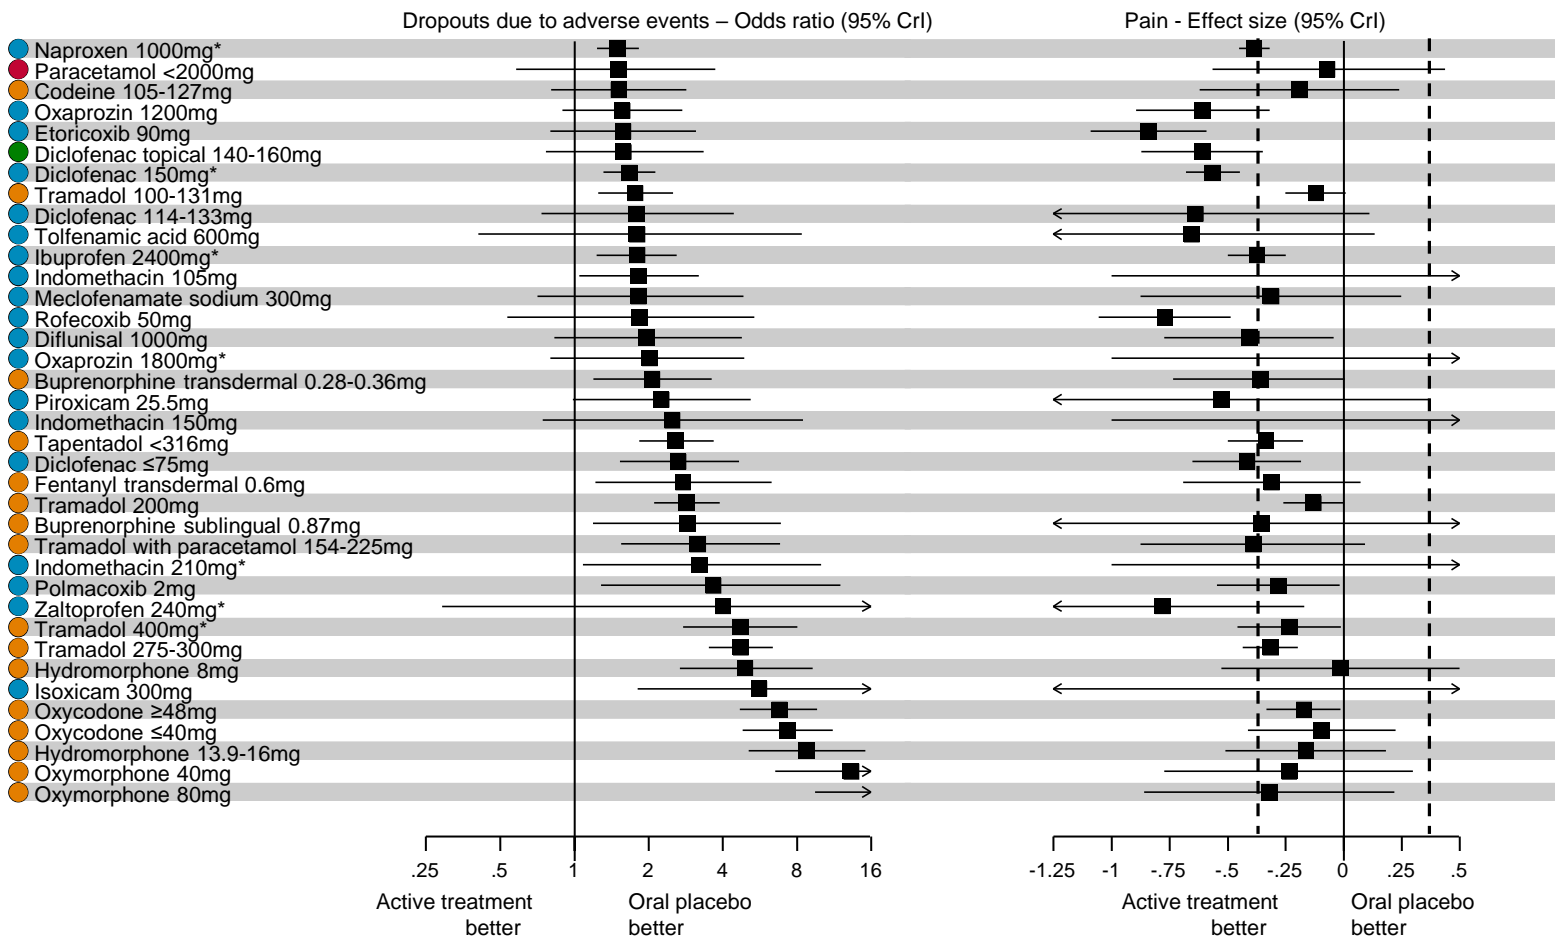

95% CrI: 95% credible interval. \*Maximum daily recommended dose. Blue: oral non-steroidal anti-inflammatory drugs; green: topical non-steroidal anti-inflammatory drugs; orange: opioids; red: paracetamol; black: placebo. Area between dashed lines shows treatment effect estimates below the minimum clinically important difference. See Figures 2-3 for caterpillar plot ordered according to the treatment effect size on osteoarthritis pain. See Tables 2-3 for specific estimates with 95% CrI and additional outcomes.

**Web-appendix 18. Model fit for pain and function**

|                 | <b>Data points</b> | <b>Residuals<br/>Number (%) within 1.96<br/>SND</b> | <b>Q-Q plots</b> |
|-----------------|--------------------|-----------------------------------------------------|------------------|
| <b>Pain</b>     | 1080               | 1069 (99%)                                          | Adequate         |
| <b>Function</b> | 735                | 731 (99%)                                           | Adequate         |

SND: Standard normal distribution

**Web-appendix 19. Model fit for safety outcomes**

|                                       | <b>Data points</b> | <b>Mean residual deviance</b> |
|---------------------------------------|--------------------|-------------------------------|
| <b>Dropouts due to adverse events</b> | 439                | 452                           |
| <b>Any adverse event</b>              | 364                | 382                           |
| <b>Serious adverse events</b>         | 253                | 274                           |

**Web-appendix 20. Assessment of inconsistency**

|                                       | <b>DIC</b> |
|---------------------------------------|------------|
| <b>Pain</b>                           |            |
| Consistency model                     | -1678      |
| Inconsistency model                   | -1670      |
| <b>Function</b>                       |            |
| Consistency model                     | -1125      |
| Inconsistency model                   | -1119      |
| <b>Dropouts due to adverse events</b> |            |
| Consistency model                     | 2603       |
| Inconsistency model                   | 2626       |
| <b>Any adverse event</b>              |            |
| Consistency model                     | 2634       |
| Inconsistency model                   | 2651       |
| <b>Serious adverse events</b>         |            |
| Consistency model                     | 1078       |
| Inconsistency model                   | 1087       |
